# Supplementary material for: Gold(i) catalysed regio- and stereoselective intermolecular hydroamination of internal alkynes: towards functionalised azoles
Source: Royal Society of Chemistry journal article supplement (doi:10.1039/c9ob00587k), 2019-01-01

## Supporting information

### Gold(I) catalysed regio- and stereoselective intermolecular hydroamination of internal alkynes: towards functionalized azoles.

Christophe Michon,<sup>\*a,b</sup> Joachim Gilbert,<sup>a,b</sup> Xavier Trivelli,<sup>c</sup> Fady Nahra,<sup>d</sup> Catherine S. J. Cazin,<sup>d</sup> Francine Agbossou-Niedercorn,<sup>a,b</sup> Steven P. Nolan<sup>\*d,e</sup>

<sup>a</sup> Univ. Lille, CNRS, Centrale Lille, ENSCL, Univ. Artois, UMR 8181 - UCCS - Unité de Catalyse et Chimie du Solide, F-59000 Lille, France

<sup>b</sup> ENSCL, UCCS-CCM-MOCAH UMR 8181, (Chimie-C7) CS 90108, 59652 Villeneuve d'Ascq Cedex, France

<sup>c</sup> UGSF CNRS, UMR 8576, Univ. Lille, 59655 Villeneuve d'Ascq Cedex France

<sup>d</sup> Department of Chemistry, Ghent University, Building S3, Krijgslaan 281, 9000 Gent, Belgium

<sup>e</sup> Department of Chemistry, College of Science, King Saud University, P.O. Box 2455, Riyadh 11451, Saudi Arabia

Email : christophe.michon@univ-lille.fr, Steven.Nolan@ugent.be

|                                                                                                                              |    |
|------------------------------------------------------------------------------------------------------------------------------|----|
| I) General remarks.                                                                                                          | 2  |
| II) General procedures.                                                                                                      | 2  |
| III) Characterization of compounds.                                                                                          | 3  |
| IV) NMR study of <sup>3</sup> J( <sup>1</sup> H- <sup>15</sup> N) coupling constants and of <sup>15</sup> N chemical shifts. | 17 |
| V) Hydrogenation of enamines <b>4</b> : screening of the reaction conditions.                                                | 18 |
| VI) References                                                                                                               | 19 |
| VII) <sup>1</sup> H, <sup>13</sup> C NMR spectra of isolated compounds.                                                      | 20 |

## I) General Remarks.

All reactions were carried out under air atmosphere and were repeated at least twice. All experiments under microwave irradiations were performed on a CEM Discover SP. Analytical grade solvents were used when needed. Analytical thin layer chromatography (TLC) was performed on Merck pre-coated 0.20 mm silica gel Alugram Sil 60 G/UV<sub>254</sub> plates. Flash chromatography was carried out with Macherey silica gel (Kieselgel 60). <sup>1</sup>H (300, 600 and 900 MHz) and <sup>13</sup>C (75 and 126 MHz) spectra were acquired on Bruker Avance II, II HD, III, III HD and NEO spectrometers. Assignment was accomplished using 1D and 2D NMR techniques: 1D-<sup>1</sup>H quantitative, 2D-<sup>1</sup>H-NOESY (*T*<sub>m</sub> = 0.3-0.4 s), 2D-<sup>13</sup>C-HSQC, 2D-<sup>13</sup>C-HSQC-TOCSY (*T*<sub>m</sub> = 50 ms), 2D-<sup>13</sup>C-HMBC (*J*<sub>app</sub> = 10 Hz), 2D-<sup>15</sup>N-HMBC (*J*<sub>app</sub> = 8 Hz), 1D-<sup>1</sup>H-NOESY (*T*<sub>m</sub> = 0.5 s) selective if necessary, 1D-<sup>1</sup>H-TOCSY (*T*<sub>m</sub> = 100 ms) selective if necessary. The definition of the (*Z*)/(*E*) (cis/trans) isomerism of pure or mixed isomers was established according the observed and non-observed NOEs profiles after full assignment of <sup>1</sup>H/<sup>13</sup>C/<sup>15</sup>N chemical shifts. Chemical shifts ( $\delta$ ) are reported downfield of Me<sub>4</sub>Si in ppm and coupling constants are expressed in Hz. 1,3,5-trimethoxybenzene and 1,2,4,5-tetrachlorobenzene were used as internal standards when needed. Gas chromatography analyses were done on GC Shimadzu 2010+ with FID detectors using Supelco SPB-5 column (30 m, 0.25 mm, 0.25  $\mu$ m) and with nitrogen as gas carrier. GC-MS analyses were performed on a Shimadzu QP2010+ (EI mode) using Supelco column SLBTM-5ms (30m, 0.25mm, 0.25 $\mu$ m). HRMS-ESI analyses were performed at PSM-EA 7365 GRITA-Pharm. Dept.-University of Lille. All reagents, e.g. alkynes and heterocycles, were used as received without any purification. [Au(IPr)(OH)] **1a**,<sup>1a</sup> [Au(IPr)][NTf<sub>2</sub>] **1b**<sup>1b,c</sup> and [{Au(IPr)}<sub>2</sub>( $\mu$ -OH)][BF<sub>4</sub>] **1c**<sup>1d</sup> were synthesized according to previous reports.<sup>1</sup>

## II) General Procedures for the catalyses:

### Synthetic procedure by heating with a sand bath - method A:

All reactions were performed in screw-capped vials containing a stirring bar. To a mixture of [{Au(IPr)}<sub>2</sub>( $\mu$ -OH)][BF<sub>4</sub>] (0.5 mol%), tetrabutylammonium triflate (5 mol%) and heterocycle (1 eq., 0.22 mmol) was added the alkyne reagent (1.3 eq., 0.29 mmol). The reaction mixture was stirred in a sand bath at 100°C for 72 hours. After cooling, the completion of the reaction was checked by GC analysis and the reaction mixture was purified by flash chromatography or preparative TLC using mixtures of petroleum ether and ethylacetate (70/30 to 95/5) to afford the corresponding product.

### Synthetic procedure by heating with microwave irradiations - method B:

All reactions were performed in capped closed tubes containing a stirring bar under monomode microwave at 150 °C for 45 minutes. To a mixture of [{Au(IPr)}<sub>2</sub>( $\mu$ -OH)][BF<sub>4</sub>] (0.5 mol%), tetrabutylammonium triflate (5 mol%) and heterocycle (1 eq., 0.22 mmol) was added the alkyne reagent (1.3 eq., 0.29 mmol). The reaction mixture was stirred at 150°C for 45 minutes. After cooling, the completion of the reaction was checked by GC analysis and the reaction mixture was purified by flash chromatography or preparative TLC using mixtures of petroleum ether and ethylacetate (70/30 to 95/5) to afford the corresponding product.

### Synthetic procedure for the hydrogenation of enamines at atmospheric pressure (e.g. 1 bar) – method C:

In a Schlenk tube connected to a 3 ways stopcock were placed enamine substrate (50 mg), palladium on carbon at 5% (1 mol%) and ethyl acetate (3 mL). The reaction mixture was then connected to a hydrogen balloon, purged 3 times through vacuum-hydrogen cycles and finally heated at the desired temperature for 15 hours. After cooling, the crude reaction mixture was filtered over a pad of Celite<sup>TM</sup> which was then washed with ethyl acetate (2 \* 10 mL) and the completion of the reaction was checked by GC analysis. When necessary, the reaction mixture was purified by flash chromatography or preparative TLC using mixtures of petroleum ether and ethyl acetate (70/30 to 95/5) to afford the corresponding product.

### Synthetic procedure for the hydrogenation of enamines at subatmospheric pressure (e.g. >1 bar) – method D:

In a stainless steel autoclave were placed enamine substrate (50 mg), palladium on carbon at 5% (1 mol%) and ethylacetate (3 mL). The autoclave was then connected to hydrogen gas, purged 3 times through vacuum-hydrogen cycles and finally pressurized at the chosen pressure. Heating (water bath) and stirring (magnetic stirring plate) were started and the reaction time was counted since the desired temperature was reached. The reactions were run at 60 or 80°C for 15 to 120 hours depending on the enamine to hydrogenate. After cooling (1 hour), the autoclave was degassed and subsequently opened. The crude reaction mixture was filtered over a pad of Celite<sup>TM</sup> which was then washed with ethyl acetate (2 \* 10 mL) and the completion of the reaction was checked by GC analysis. When necessary, the reaction mixture was purified by flash chromatography or preparative TLC using mixtures of petroleum ether and ethylacetate (70/30 to 95/5) to afford the corresponding product.

## III) Characterization of compounds.

### 4aa (Z)-1-(1,2-diphenylvinyl)-1H-benzo[d][1,2,3]triazole<sup>2</sup>

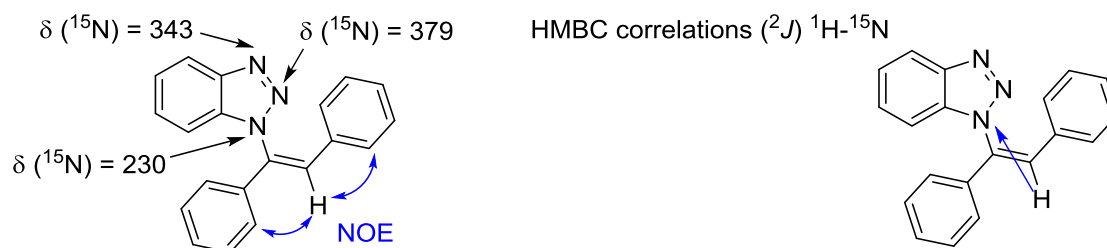

White solid (from 0.022 mmol of benzotriazole using method A, 0.043 g, 66% yield) or (from 1 mmol of benzotriazole using method B, 0.285 g, 96% yield), R<sub>f</sub> = 0.3, petroleum ether and ethyl acetate solvent mixture (9:1).

<sup>1</sup>H NMR (CDCl<sub>3</sub>): δ 8.05 (d, 1H, J = 6.7), 7.25 (m, 6H), 7.10 (m, 2H), 7.00 (m, 4H), 6.65 (d, 2H, J = 6.7).

<sup>13</sup>C NMR (CDCl<sub>3</sub>): δ 145.9 (C), 136.8 (C), 133.7 (C), 133.6 (C), 133.3 (C), 129.4 (1CH), 129.0 (2CH), 128.7 (4CH), 128.2 (1CH), 127.8 (1CH), 126.1 (2CH), 124.3 (1CH), 120.1 (1CH), 110.6 (1CH).

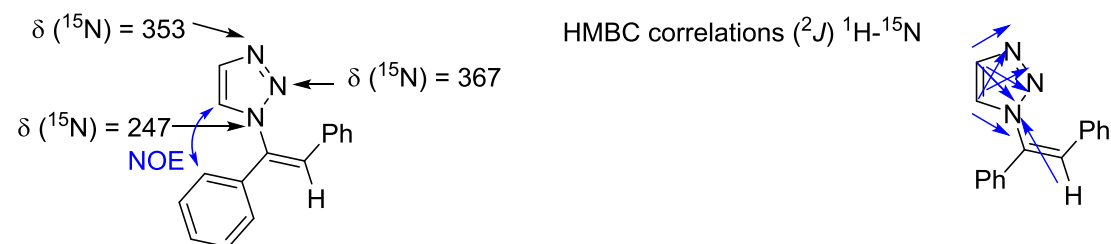

White solid. (0.017 g, 31 % yield using method A) or (from 1.1 mmol triazole using method B, 0.155 g, 57% yield), R<sub>f</sub> = 0.4, petroleum ether and ethyl acetate solvent mixture (8:2).

<sup>1</sup>H NMR (CDCl<sub>3</sub>): δ 7.85 (d, 1H, *J* = 1.0), 7.55 (d, 1H, *J* = 1.0), 7.37 (m, 3H), 7.21 (m, 6H), 6.79 (m, 2H).

<sup>13</sup>C NMR (CDCl<sub>3</sub>): δ 136.5 (C), 134.9 (C), 134.3 (CH), 133.3 (C), 129.5 (CH), 129.0 (2CH), 128.9 (CH), 128.8 (4CH), 127.0 (CH), 125.9 (CH), 125.8 (2CH).

HRMS (ESI+): m/z calcd for C<sub>16</sub>H<sub>14</sub>N<sub>3</sub> [MH<sup>+</sup>] 248.11822, found 248.11777.

**4ac (Z)-2-(1,2-diphenylvinyl)-2H-1,2,3-triazole**

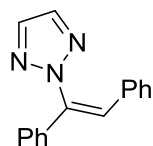

White solid (0.008 g, 15 % yield using method A) or (from 1.1 mmol triazole using method B, 0.058 g, 21% yield using method B), Rf = 0.7, petroleum ether and ethyl acetate solvent mixture (8:2).

<sup>1</sup>H NMR (CDCl<sub>3</sub>): δ 7.85 (s, 2H), 7.35 (m, 3H), 7.19 (m, 6H), 6.73 (m, 2H).

<sup>13</sup>C NMR (CDCl<sub>3</sub>): δ 138.2 (C), 136.9 (C), 135.6 (2CH), 133.9 (C), 129.2 (CH), 128.9 (2CH), 128.8 (2CH), 128.6 (CH), 128.5 (2CH), 127.2 (CH), 126.1 (2CH).

**4ad (Z,E)-1-(1,2-diphenylvinyl)-3-methylimidazolidin-2-one**

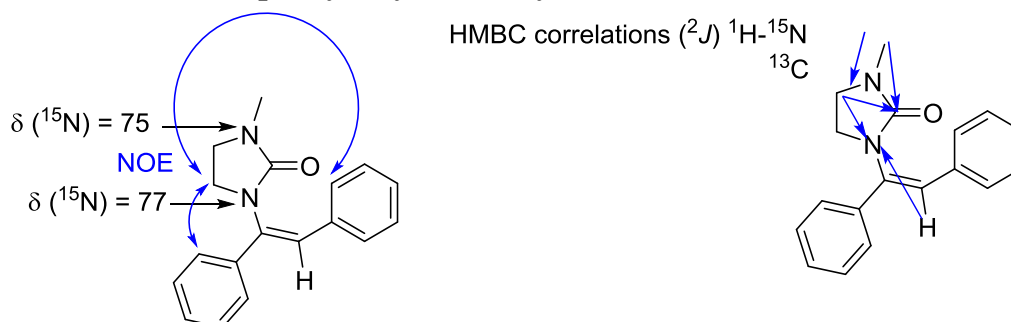

Mixture of (Z)/(E) isomers (68/32)

yellow oil (0.051 g, 83% yield using method A),  $R_f = 0.5$ , petroleum ether and ethyl acetate solvent mixture with 5% triethylamine (70:25:5).

**major (Z)-4ad:**

<sup>1</sup>H NMR (CDCl<sub>3</sub>): δ 7.36 (d, 4H, *J* = 7.8), 7.28 (m, 6H), 6.62 (s, 1H), 3.39 (m, 4H), 2.77 (s, 3H, Me).

<sup>13</sup>C NMR (CDCl<sub>3</sub>): δ 159.2 (CO), 138.0 (C), 136.7 (C), 136.2 (C), 129.1 (CH), 128.6 (CH), 128.5 (4CH), 128.3 (CH), 127.6 (CH), 125.5 (CH), 45.7 (CH<sub>2</sub>), 42.9 (CH<sub>2</sub>), 31.7 (CH<sub>3</sub>).

**minor (*E*)-4ad:**

$^1\text{H}$  NMR ( $\text{CDCl}_3$ ):  $\delta$  7.28 (m, 5H), 6.95 (m, 3H), 6.82 (d, 2H,  $J = 8.1$ ), 6.54 (s, 1H), 3.26 (m, 4H), 2.76 (s, 3H, Me).

$^{13}\text{C}$  NMR ( $\text{CDCl}_3$ ):  $\delta$  158.7 (CO), 138.2 (C), 136.2 (C), 135.7 (C), 129.7 (CH), 128.6 (2CH), 128.3 (CH), 127.8 (CH), 126.2 (2CH), 125.9 (CH), 118.4 (CH), 44.5 ( $\text{CH}_2$ ), 43.6 ( $\text{CH}_2$ ), 31.4 ( $\text{CH}_3$ ).

HRMS (ESI+):  $m/z$  calcd for  $\text{C}_{18}\text{H}_{19}\text{N}_2\text{O}$  [ $\text{MH}^+$ ] 279.14919, found 279.14798.

**4ba (*Z*)-dimethyl 2-(1H-benzo[d][1,2,3]triazol-1-yl)fumarate<sup>3</sup>**

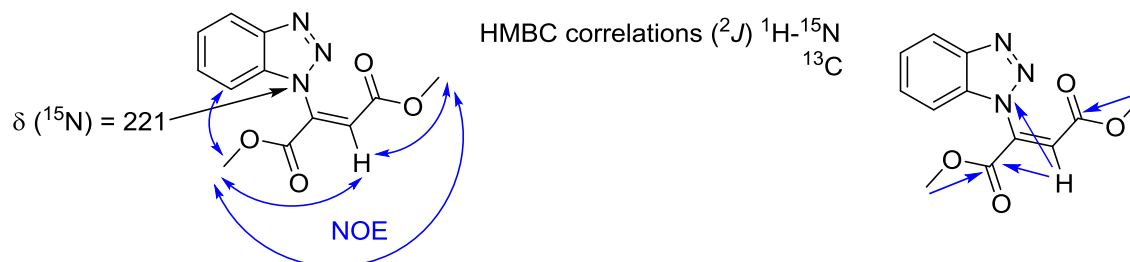

White solid (0.040 g, 69% yield of (*Z*) and (*E*) isomers (1/1) using method A with only 6 hours of reaction),  $R_f = 0.7$ , petroleum ether and ethyl acetate solvent mixture (7:3).

$^1\text{H}$  NMR ( $\text{CDCl}_3$ ):  $\delta$  8.07 (d, 1H,  $J = 8.3$ ), 7.52 (t, 1H,  $J = 8.2$ ), 7.42 (m, 2H), 7.34 (s, 1H), 3.89 (s, 3H), 3.57 (s, 3H).

$^{13}\text{C}$  NMR ( $\text{CDCl}_3$ ):  $\delta$  162.9 (C), 162.2 (C), 145.7 (C), 134.2 (C), 133.7 (C), 128.7 (CH), 128.6 (CH), 124.5 (CH), 120.3 (CH), 110.4 (CH), 53.9 ( $\text{CH}_3$ ), 52.6 ( $\text{CH}_3$ ).

**4ba (*E*)-dimethyl 2-(1H-benzo[d][1,2,3]triazol-1-yl)maleate<sup>3</sup>**

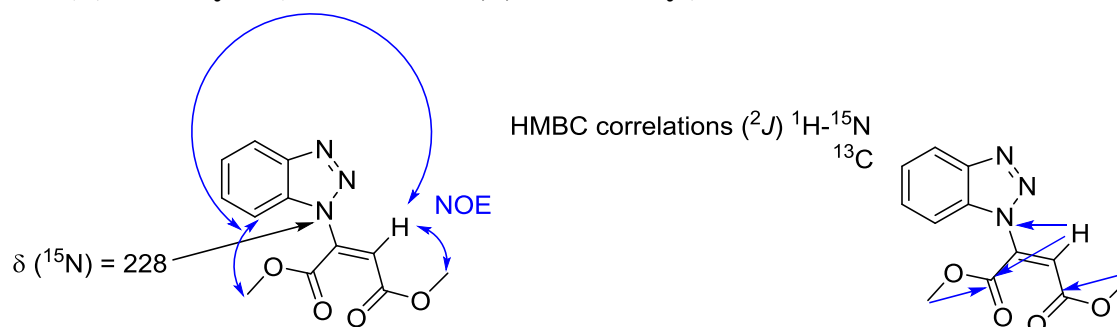

White solid (0.040 g, 69% yield) of (*Z*) and (*E*) isomers (1/1) using method A with only 6 hours of reaction),  $R_f = 0.5$ , petroleum ether and ethyl acetate solvent mixture (7:3).

$^1\text{H}$  NMR ( $\text{CDCl}_3$ ):  $\delta$  8.14 (d, 1H,  $J = 7.4$ ), 7.62 (m, 2H), 7.51 (m, 1H), 6.89 (s, 1H), 4.06 (s, 3H), 3.87 (s, 3H).

$^{13}\text{C}$  NMR ( $\text{CDCl}_3$ ):  $\delta$  164.7 (C), 162.4 (C), 146.7 (C), 140.4 (C), 131.2 (C), 129.9 (2CH), 125.7 (2CH), 121.1 (CH), 110.9 (CH), 109.9 (CH), 53.8 (CH), 52.6 (CH).

#### 4be (Z,E)-dimethyl 2-(1H-pyrazol-1-yl)maleate<sup>4</sup>

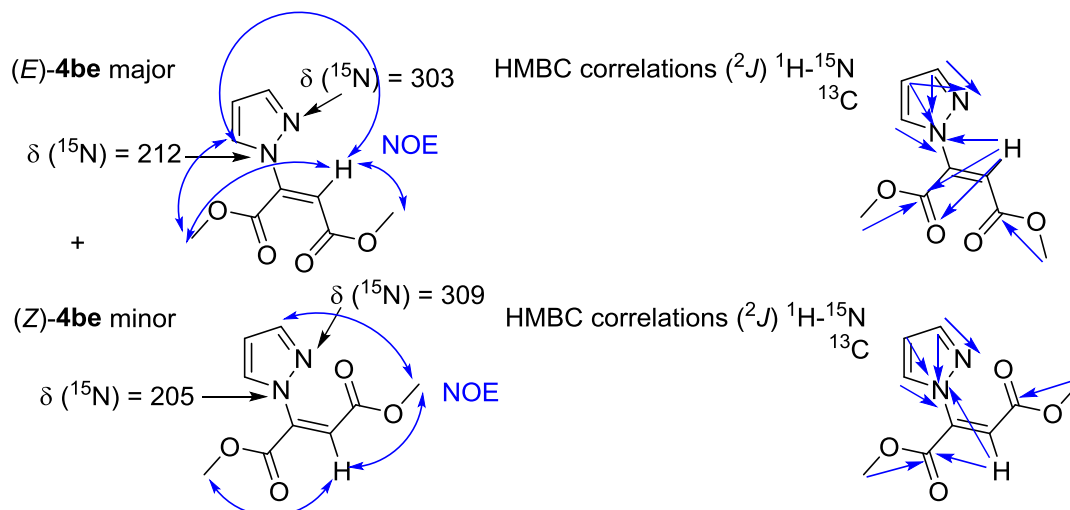

mixture of (Z)/(E) isomers (1/9).

Colorless oil (0.026 g, 56% yield using method A) or (from 1.1 mmol pyrazole using method B, 0.150 g, 65% yield),  $R_f = 0.3$ , petroleum ether and triethylamine solvent mixture (95:5).

**Major (Z)-4be isomer:**  $^1\text{H}$  NMR ( $\text{CDCl}_3$ ):  $\delta$  7.72 (d, 1H,  $J = 1.6$ ), 7.63 (d, 1H,  $J = 2.7$ ), 6.45 (dd, 1H,  $J = 2.7$ ,  $J = 1.6$ ), 6.39 (s, 1H), 4.00 (s, 3H), 3.77 (s, 3H).

$^{13}\text{C}$  NMR ( $\text{CDCl}_3$ ):  $\delta$  165.5 (CO), 163.4 (CO), 143.7 (CH), 143.6 (C), 128.6 (CH), 109.7 (CH), 104.5 (CH), 53.7 ( $\text{CH}_3$ ), 52.3 ( $\text{CH}_3$ ).

**Minor (E)-4be isomer:**  $^1\text{H}$  NMR ( $\text{CDCl}_3$ ):  $\delta$  7.82 (d, 1H,  $J = 1.6$ ), 7.64 (d, 1H,  $J = 2.7$ ), 6.83 (s, 1H), 6.40 (m, 1H), 3.88 (s, 3H, Me), 3.70 (s, 3H, Me).

$^{13}\text{C}$  NMR ( $\text{CDCl}_3$ ):  $\delta$  165.5 (CO), 163.4 (CO), 149.4 (C), 141.6 (CH), 131.9 (CH), 122.1 (CH), 107.5 (CH), 53.6 ( $\text{CH}_3$ ), 52.4 ( $\text{CH}_3$ ).

#### 4ca (Z)-ethyl-3-(1H-benzo[d][1,2,3]triazol-1-yl)-3-phenylacrylate<sup>5</sup>

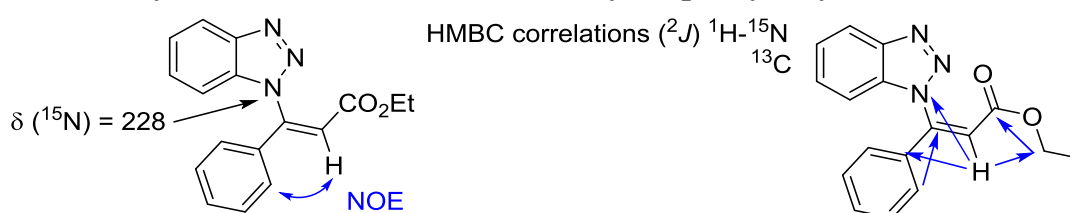

Colorless oil (0.054 g, 88% yield using method A) or (from 1.1 mmol benzotriazole using method B, 0.162 g, 50% yield),  $R_f = 0.6$ , petroleum ether and ethyl acetate solvent mixture (8:2).

$^1\text{H}$  NMR ( $\text{CDCl}_3$ ):  $\delta$  8.07 (dd, 1H,  $J = 6.8$ ), 7.34 (m, 5H), 7.18 (dd, 2H,  $J = 7.1$ ), 7.05 (dd, 1H,  $J = 6.8$ ), 6.55 (s, 1H), 3.89 (q, 2H,  $J = 7.2$ ), 0.85 (t, 3H,  $J = 7.2$ ).

$^{13}\text{C}$  NMR ( $\text{CDCl}_3$ ):  $\delta$  163.7 (CO), 145.8 (C), 144.8 (C), 134.2 (C), 133.9 (C), 131.6 (CH), 129.3 (CH), 128.3 (CH), 127.4 (CH), 124.4 (CH), 120.3 (CH), 116.6 (CH), 110.5 (CH), 61.0 ( $\text{CH}_2$ ), 13.8 ( $\text{CH}_3$ ).

#### 4cb (Z)-ethyl-3-phenyl-3-(1H-1,2,3-triazol-1-yl)acrylate

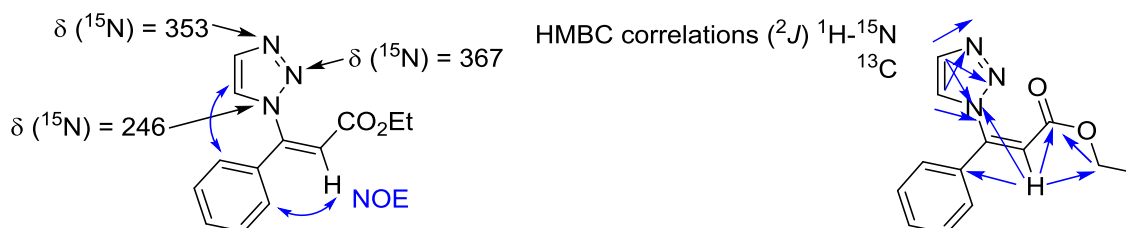

Orange solid (0.038 g, 70% yield using method A) or (from 1 mmol triazole using method B, 0.188 g, 70% yield),  $R_f$  = 0.3, petroleum ether and ethyl acetate solvent mixture (8:2).

$^1\text{H}$  NMR ( $\text{CDCl}_3$ ):  $\delta$  7.76 (bs, 1H), 7.66 (bs, 1H), 7.40 (t, 1H,  $J$  = 7.2), 7.32 (t, 2H,  $J$  = 7.4), 7.14 (d, 2H,  $J$  = 7.2), 6.42 (s, 1H), 4.03 (q, 2H,  $J$  = 7.2), 1.09 (t, 3H,  $J$  = 7.1).

$^{13}\text{C}$  NMR ( $\text{CDCl}_3$ ):  $\delta$  163.5 (CO), 145.4 (C), 134.4 (C), 133.5 (CH), 131.6 (CH), 129.2 (2CH), 127.2 (2CH), 125.9 (CH), 116.0 (CH), 61.2 ( $\text{CH}_2$ ), 14.1 ( $\text{CH}_3$ ).

HRMS (ESI+):  $m/z$  calcd for  $\text{C}_{13}\text{H}_{14}\text{N}_3\text{O}_2$  [ $\text{MH}^+$ ] 244.10805, found 244.10744.

#### 4ce (Z)-ethyl-3-phenyl-3-(1H-pyrazol-1-yl)acrylate<sup>6</sup>

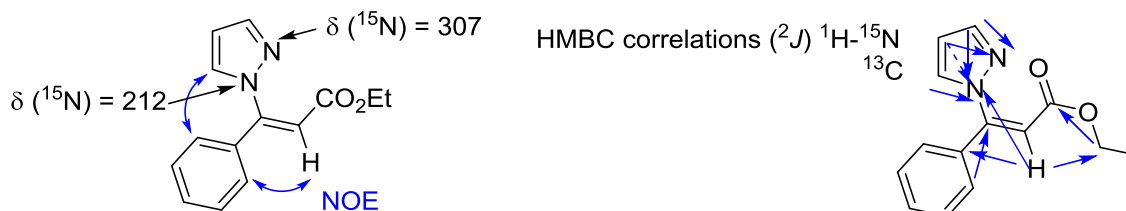

Colorless oil (0.033 g, 62% yield using method A) or (from 1.1 mmol pyrazole using method B, 0.198 g, 74% yield),  $R_f$  = 0.7, petroleum ether and ethyl acetate solvent mixture with 5% triethylamine (90:5:5).

$^1\text{H}$  NMR ( $\text{CDCl}_3$ ):  $\delta$  7.65 (d, 1H,  $J$  = 1.5), 7.56 (d, 1H,  $J$  = 2.4), 7.33 (m, 3H), 7.19 (d\*, 2H,  $J$  = 6.9), 6.37 (t\*, 1H,  $J$  = 2.1), 6.10 (s, 1H), 4.08 (q, 2H,  $J$  = 7.2), 1.13 (t, 3H,  $J$  = 7.1).

$^{13}\text{C}$  NMR ( $\text{CDCl}_3$ ):  $\delta$  164.6 (CO), 149.0 (C), 141.5 (CH), 135.9 (C), 132.5 (CH), 131.0 (CH), 128.8 (2CH), 128.2 (2CH), 112.2 (CH), 106.8 (CH), 60.8 ( $\text{CH}_2$ ), 14.2 ( $\text{CH}_3$ ).

#### 4cf (Z)-ethyl-3-(1H-indazol-1-yl)-3-phenylacrylate

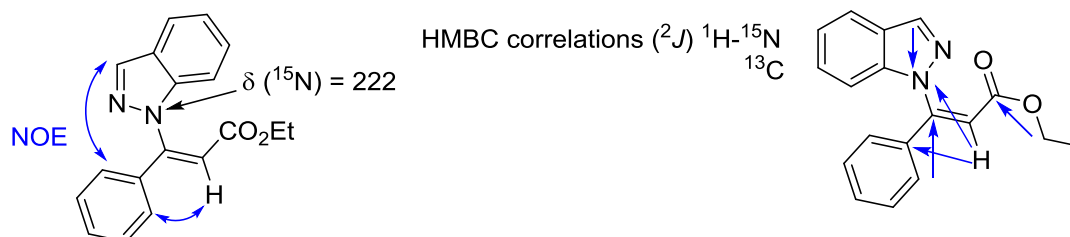

Colorless oil (0.042 g, 65% yield using method A),  $R_f$  = 0.4, petroleum ether and ethyl acetate solvent mixture (8:2).

$^1\text{H}$  NMR ( $\text{CDCl}_3$ ):  $\delta$  8.05 (d, 1H,  $J$  = 0.9), 7.64 (dd, 2H,  $J$  = 8.5), 7.29 (m, 4H), 7.16 (m, 3H), 7.05 (dd, 1H,  $J$  = 6.7), 6.39 (s, 1H), 3.98 (q, 2H,  $J$  = 7.2), 0.95 (t, 3H,  $J$  = 7.2).

$^{13}\text{C}$  NMR ( $\text{CDCl}_3$ ):  $\delta$  164.2 (CO), 149.7 (C), 149.3 (C), 135.4 (C), 131.2 (CH), 129.0 (2CH), 127.7 (2CH), 127.1 (CH), 126.0 (CH), 122.7 (CH), 121.9 (C), 120.7 (CH), 118.3 (CH), 115.0 (CH), 60.9 ( $\text{CH}_2$ ), 14.0 ( $\text{CH}_3$ ).

HRMS (ESI+):  $m/z$  calcd for  $C_{18}H_{17}N_2O_2$   $[MH^+]$  293.12845, found 293.12799.

**4de (Z)-3-phenyl-3-(1H-pyrazol-1-yl)acrylonitrile<sup>7</sup>**

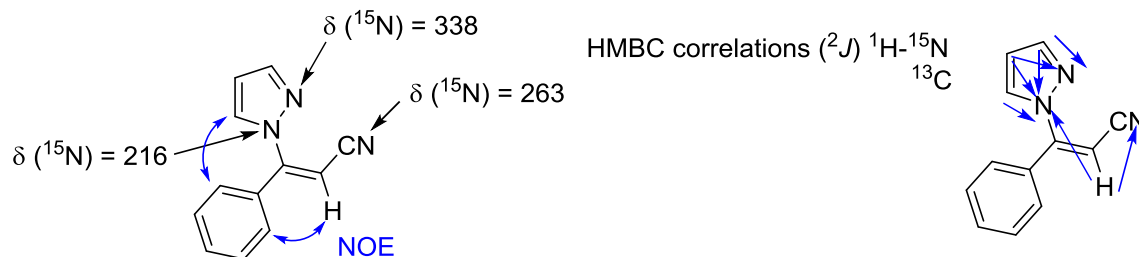

Colorless oil (0.039 g, 91% yield using method A) or (from 0.44 mmol pyrazole using method B, 0.058 g, 67% yield),  $R_f = 0.7$ , petroleum ether and ethyl acetate solvent mixture (8:2).

$^1H$  NMR ( $CDCl_3$ ):  $\delta$  7.84 (d, 1H,  $J = 1.5$ ), 7.73 (d, 1H,  $J = 2.6$ ), 7.54 (t, 1H,  $J = 7.5$ ), 7.45 (t, 2H,  $J = 7.5$ ), 7.36 (d, 2H,  $J = 7.1$ ), 6.50 (t, 1H,  $J = 2.2$ ), 5.35 (s, 1H).

$^{13}C$  NMR ( $CDCl_3$ ):  $\delta$  154.4 (C), 143.1 (CH), 133.9 (C), 131.8 (CH), 131.6 (CH), 129.1 (2CH), 128.9 (2CH), 116.3 (C), 108.7 (CH), 85.9 (CH).

**5de (Z)-3-phenyl-2-(1H-pyrazol-1-yl)acrylonitrile<sup>8</sup>**

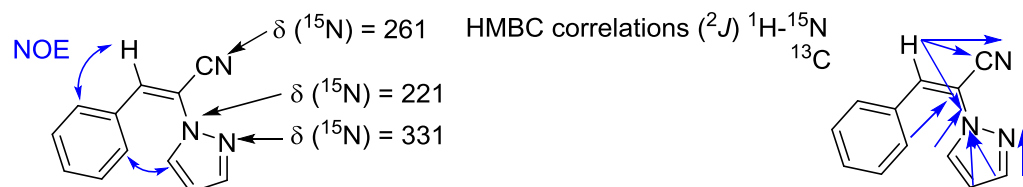

Colorless oil (0.004 g, 10% yield using method A) or (from 0.440 mmol pyrazole using method B, 0.012 g, 14% yield),  $R_f = 0.8$ , petroleum ether and ethyl acetate solvent mixture (8:2).

$^1H$  NMR ( $CDCl_3$ ):  $\delta$  7.71 (bs, 1H), 7.48 (m, 5H), 7.21 (t, 1H,  $J = 2.4$ ), 6.34 (t, 1H,  $J = 1.8$ ), 6.17 (s, 1H).

$^{13}C$  NMR ( $CDCl_3$ ):  $\delta$  155.1 (C), 143.8 (CH), 131.6 (CH), 131.1 (C), 130.9 (CH), 129.7 (2CH), 129.2 (2CH), 117.2 (C), 109.2 (CH), 85.6 (CH).



**4ea (Z)-1-(5-methylhex-2-en-3-yl)-1H-benzo[d][1,2,3]triazole and 5ea (Z)-1-(5-methylhex-2-en-2-yl)-1H-benzo[d][1,2,3]triazole**

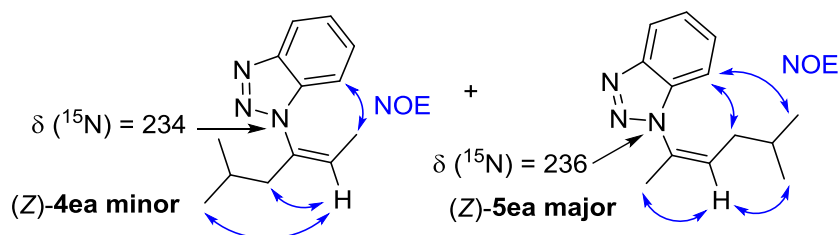

Mixture of **4ea** and **5ea** with a ratio of (23/77)

Colorless oil (0.036 g, 75% yield using method A),  $R_f = 0.8$ , petroleum ether and ethyl acetate solvent mixture (8:2).

**Minor product (Z)-4ea:**

$^1\text{H}$  NMR ( $\text{CDCl}_3$ ):  $\delta$  8.02 (d, 1H,  $J = 8.2$ ), 7.42 (t, 1H,  $J = 7.5$ ), 7.18 (m, 2H), 5.79 (m, 1H), 2.21 ( $\text{d}^*$ , 3H,  $J = 1.2$ ), 1.62 (m, 2H), 1.55 (m, 1H), 0.72 (d, 6H,  $J = 6.5$ ).

$^{13}\text{C}$  NMR ( $\text{CDCl}_3$ ):  $\delta$  145.5 (C), 132.9 (C), 131.5 (C), 129.1 (CH), 127.6 (CH), 124.0 (CH), 120.1 (CH), 110.3 (CH), 36.6 ( $\text{CH}_2$ ), 28.3 (CH), 22.3 ( $2\text{CH}_3$ ), 22.2 ( $\text{CH}_3$ ).

**Major product (Z)-5ea:**

$^1\text{H}$  NMR ( $\text{CDCl}_3$ ):  $\delta$  8.02 (d, 1H,  $J = 8.2$ ), 7.42 (t, 1H,  $J = 7.5$ ), 7.18 (m, 2H), 5.79 (m, 1H), 2.46 (d, 2H,  $J = 7.1$ ), 1.45 (d, 3H,  $J = 7.0$ ), 1.29 (m, 1H), 0.79 (d, 6H,  $J = 6.6$ ).

$^{13}\text{C}$  NMR ( $\text{CDCl}_3$ ):  $\delta$  145.4 (C), 135.5 (C), 131.7 (C), 127.7 (CH), 124.4 (CH), 123.9 (CH), 120.2 (CH), 110.4 (CH), 45.7 ( $\text{CH}_2$ ), 25.8 (CH), 22.5 ( $2\text{CH}_3$ ), 13.4 ( $\text{CH}_3$ ).

HRMS (ESI<sup>+</sup>):  $m/z$  calcd for  $\text{C}_{13}\text{H}_{18}\text{N}_3$  [ $\text{MH}^+$ ] 216.14952, found 216.14925.

**4fa (Z)-1-(1-phenylprop-1-en-2-yl)-1H-benzo[d][1,2,3]triazole and 5fa (Z)-1-(1-phenylprop-1-en-2-yl)-1H-benzo[d][1,2,3]triazole<sup>2</sup>**

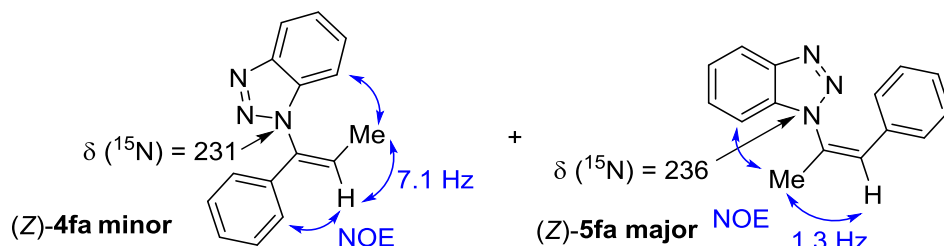

Mixture of **4fa** and **5fa** with a ratio of (3/7)

Pale yellow oil (0.045 g, 88% yield using method A),  $R_f = 0.5$ , petroleum ether and ethyl acetate solvent mixture (8:2).

**Minor product (Z)-4fa:**

$^1\text{H}$  NMR ( $\text{CDCl}_3$ ):  $\delta$  8.03 (d, 1H,  $J = 7.3$ ), 7.23 (m, 2H), 7.00 (m, 4H), 6.74 (bd, 1H,  $J = 1.3$ ), 6.68 (d, 2H,  $J = 7.5$ ), 2.49 (d, 3H,  $J = 1.5$ ).

$^{13}\text{C}$  NMR ( $\text{CDCl}_3$ ):  $\delta$  145.8 (C), 136.1 (C), 133.8 (C), 131.4 (C), 128.8 (CH), 128.5 (2CH), 128.1 (2CH), 127.9 (CH), 126.0 (CH), 124.0 (CH), 119.9 (CH), 110.8 (CH), 23.7 ( $\text{CH}_3$ ).

**Major product (Z)-5fa:**

$^1\text{H}$  NMR ( $\text{CDCl}_3$ ):  $\delta$  8.13 (d, 1H,  $J = 6.8$ ), 7.39 (m, 2H), 7.23 (m, 5H), 7.08 (m, 1H), 6.59 (q, 1H,  $J = 7.1$ ), 1.76 (d, 3H,  $J = 7.1$ ).

$^{13}\text{C}$  NMR ( $\text{CDCl}_3$ ):  $\delta$  145.7 (C), 135.8 (C), 133.7 (C), 131.7 (C), 128.7 (CH), 128.5 (CH), 128.1 (2CH), 128.0 (CH), 127.6 (CH), 125.5 (CH), 124.2 (CH), 120.2 (CH), 110.5 (CH), 14.0 ( $\text{CH}_3$ ).

**4fb (Z)-1-(1-phenylprop-1-en-2-yl)-1H-1,2,3-triazole and 5fb (Z)-1-(1-phenylprop-1-en-2-yl)-1H-1,2,3-triazole**

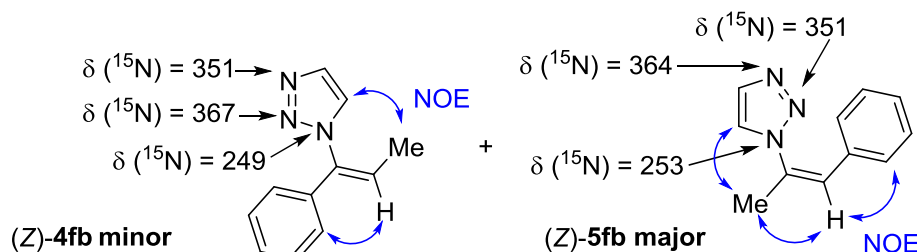

Mixture of **4fb** and **5fb** with a ratio of (23/77).

white solid (0.031 g, 76% yield using method A),  $R_f = 0.2$ , petroleum ether and ethyl acetate solvent mixture (8:2).

**Minor product (Z)-4fb:**

$^1\text{H}$  NMR ( $\text{CDCl}_3$ ):  $\delta$  7.61 (bd, 1H,  $J = 1.0$ ), 7.28 (m, 1H), 7.19 (m, 3H), 6.81 (m, 2H), 6.53 (bd, 1H,  $J = 1.2$ ), 2.44 (d, 3H,  $J = 1.0$ ).

$^{13}\text{C}$  NMR ( $\text{CDCl}_3$ ):  $\delta$  133.7 (C), 132.8 (C), 133.5 (CH), 128.7 (2CH), 128.4 (2CH), 128.1 (CH), 125.5 (CH), 124.3 (CH), 23.4 ( $\text{CH}_3$ ).

**Major product (Z)-5fb:**

$^1\text{H}$  NMR ( $\text{CDCl}_3$ ):  $\delta$  7.77 (bd, 1H,  $J = 1.1$ ), 7.57 (bd, 1H,  $J = 1.1$ ), 7.28 (m, 3H), 7.08 (m, 2H), 6.43 (q, 1H,  $J = 7.0$ ), 1.72 (d, 3H,  $J = 7.2$ ).

$^{13}\text{C}$  NMR ( $\text{CDCl}_3$ ):  $\delta$  137.6 (C), 136.4 (C), 128.9 (2CH), 128.4 (2CH), 128.1 (CH), 125.3 (CH), 124.9 (CH), 124.4 (CH), 13.8 ( $\text{CH}_3$ ).

HRMS (ESI+):  $m/z$  calcd for  $\text{C}_{11}\text{H}_{12}\text{N}_3$  [ $\text{MH}^+$ ] 186.10257, found 186.10220.

**4fe (Z)-1-(1-phenylprop-1-en-2-yl)-1H-pyrazole and 5fe (Z)-1-(1-phenylprop-1-en-1-yl)-1H-pyrazole<sup>9</sup>**

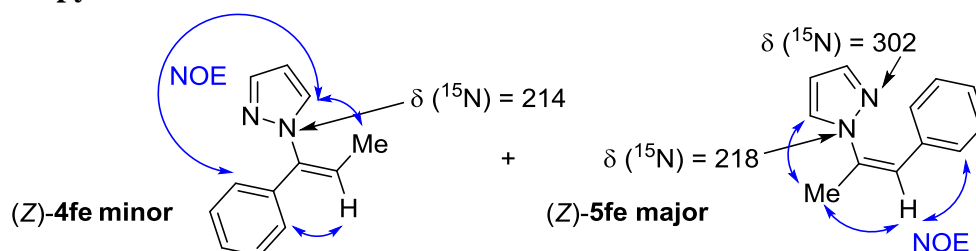

Mixture **4fe** and **5fe** with a ratio of (2/8)

Colorless oil (0.034 g, 83% yield using method A),  $R_f = 0.3$ , petroleum ether and ethyl acetate solvent mixture (9:1).

**Minor product (Z)-4fe:**

$^1\text{H}$  NMR ( $\text{CDCl}_3$ ):  $\delta$  7.56 (d, 1H,  $J = 1.5$ ), 7.08 (m, 4H), 6.74 (dd, 2H,  $J = 7.7$ ), 6.25 (bs, 1H), 6.11 (t, 1H,  $J = 2.1$ ), 2.34 (bd, 3H,  $J = 1.2$ ).

$^{13}\text{C}$  NMR ( $\text{CDCl}_3$ ):  $\delta$  140.1 (CH), 135.8 (C), 134.9 (C), 130.4 (CH), 128.5 (2CH), 128.4 (2CH), 127.3 (CH), 121.6 (CH), 106.1 (CH), 23.0 ( $\text{CH}_3$ ).

**Major product (Z)-5fe:**

$^1\text{H}$  NMR ( $\text{CDCl}_3$ ):  $\delta$  7.63 (d, 1H,  $J = 1.5$ ), 7.39 (d, 1H,  $J = 2.3$ ), 7.18 (m, 3H), 7.02 (m, 2H), 6.33 (t, 1H,  $J = 2.1$ ), 6.15 (q, 1H,  $J = 7.1$ ), 1.67 (d, 3H,  $J = 6.9$ ).

$^{13}\text{C}$  NMR ( $\text{CDCl}_3$ ):  $\delta$  140.1 (CH), 140.0 (C), 137.7 (C), 131.4 (CH), 128.6 (2CH), 128.3 (2CH), 125.8 (CH), 122.4 (CH), 105.9 (CH), 13.7 ( $\text{CH}_3$ ).

**4ga (Z)-1-(oct-4-en-4-yl)-1H-benzo[d][1,2,3]triazole<sup>2</sup>**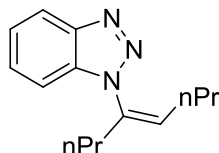

Pale yellow oil (0.035 g, 70% yield using method A) or (from 1.1 mmol benzotriazole using method B, 0.201 g, 80% yield),  $R_f = 0.9$ , petroleum ether and ethyl acetate solvent mixture with 5% triethylamine (70:25:5).

$^1\text{H}$  NMR ( $\text{CDCl}_3$ ):  $\delta$  8.01 (d, 1H,  $J = 7.1$ ), 7.4 (t, 1H,  $J = 6.6$ ), 7.38 (d + t, 2H), 5.83 (t, 1H,  $J = 7.3$ ), 2.59 (t, 2H,  $J = 7.5$ ), 1.71 (q, 2H,  $J = 7.5$ ), 1.33 (m, 4H), 0.90 (t, 3H,  $J = 7.5$ ), 0.80 (t, 3H,  $J = 7.5$ ).

$^{13}\text{C}$  NMR ( $\text{CDCl}_3$ ):  $\delta$  145.4 (C), 135.2 (C), 133.5 (C), 129.7 (CH), 127.7 (CH), 123.9 (CH), 120.1 (CH), 110.2 (CH), 38.4 ( $\text{CH}_2$ ), 29.5 ( $\text{CH}_2$ ), 22.4 ( $\text{CH}_2$ ), 20.4 ( $\text{CH}_2$ ), 13.7 ( $\text{CH}_3$ ), 13.4 ( $\text{CH}_3$ ).

**4gb (Z)-1-(oct-4-en-4-yl)-1H-1,2,3-triazole**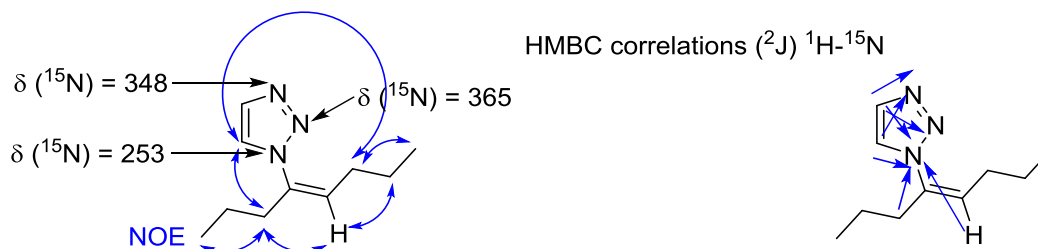

Colorless oil (0.022 g, 56% yield using method A) or (from 1.1 mmol triazole using method B, 0.088 g, 45% yield),  $R_f = 0.3$ , petroleum ether and triethylamine solvent mixture (95:5).

$^1\text{H}$  NMR ( $\text{CDCl}_3$ ):  $\delta$  7.71 (s, 1H), 7.52 (s, 1H), 5.56 (t, 1H,  $J = 7.5$ ), 2.47 (t, 2H,  $J = 7.5$ ), 1.85 (q, 2H,  $J = 7.5$ ), 1.34 (m, 4H), 0.85 (m, 6H).

$^{13}\text{C}$  NMR ( $\text{CDCl}_3$ ):  $\delta$  136.1 (C), 133.1 (CH), 127.4 (CH), 124.3 (CH), 38.3 ( $\text{CH}_2$ ), 29.2 ( $\text{CH}_2$ ), 22.6 ( $\text{CH}_2$ ), 20.2 ( $\text{CH}_2$ ), 13.7 ( $\text{CH}_3$ ), 13.3 ( $\text{CH}_3$ ).

HRMS (ESI+):  $m/z$  calcd for  $\text{C}_{10}\text{H}_{18}\text{N}_3$  [ $\text{MH}^+$ ] 180.14886, found 180.14952.

#### 4gc (Z)-2-(oct-4-en-4-yl)-2H-1,2,3-triazole

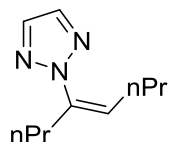

Colorless oil (0.004 g, 10% yield using method A) or (from 1.1 mmol triazole using method B, 0.047 g, 24% yield),  $R_f = 0.8$ , petroleum ether and triethylamine solvent mixture (95:5).

$^1\text{H}$  NMR ( $\text{CDCl}_3$ ):  $\delta$  7.69 (bs, 1H), 5.49 (t, 1H,  $J = 7.3$ ), 2.58 (t, 2H,  $J = 7.4$ ), 2.10 (q, 2H,  $J = 7.5$ ), 1.39 (m, 4H), 0.88 (m, 6H).

$^{13}\text{C}$  NMR ( $\text{CDCl}_3$ ):  $\delta$  143.2 (C), 134.1 (CH), 125.6 (2CH), 37.6 ( $\text{CH}_2$ ), 29.5 ( $\text{CH}_2$ ), 22.7 ( $\text{CH}_2$ ), 20.6 ( $\text{CH}_2$ ), 13.9 ( $\text{CH}_3$ ), 13.5 ( $\text{CH}_3$ ).

#### 4ge (Z)-1-(oct-4-en-4-yl)-1H-pyrazole

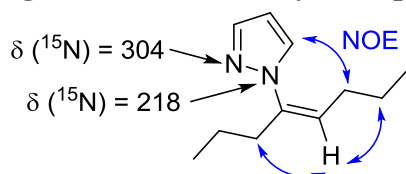

HMBC correlations ( $^2J$ )  $^1\text{H}$ - $^{15}\text{N}$

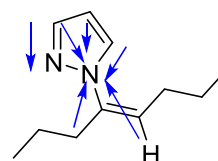

Colorless oil (0.025 g, 62% yield using method A) or (from 1.1 mmol pyrazole using method B, 0.146 g, 75% yield),  $R_f = 0.9$ , petroleum ether and ethyl acetate solvent mixture using 5% triethylamine (70:25:5).

$^1\text{H}$  NMR ( $\text{CDCl}_3$ ):  $\delta$  7.61 (d, 1H,  $J = 1.5$ ), 7.39 (d, 1H,  $J = 2.3$ ), 6.29 (t, 1H,  $J = 2.0$ ), 5.38 (t, 1H,  $J = 7.3$ ), 2.49 (t, 2H,  $J = 8.1$ ), 1.95 (q, 2H,  $J = 7.3$ ), 1.35 (m, 4H), 0.85 (m, 6H).

$^{13}\text{C}$  NMR ( $\text{CDCl}_3$ ):  $\delta$  139.6 (CH), 139.2 (C), 130.4 (CH), 124.2 (CH), 105.1 (CH), 38.2 ( $\text{CH}_2$ ), 29.3 ( $\text{CH}_2$ ), 22.9 ( $\text{CH}_2$ ), 20.4 ( $\text{CH}_2$ ), 13.9 ( $\text{CH}_3$ ), 13.5 ( $\text{CH}_3$ ).

HRMS (ESI+):  $m/z$  calcd for  $\text{C}_{11}\text{H}_{19}\text{N}_2$  [ $\text{MH}^+$ ] 179.15428, found 179.15398.

#### 4gg (Z)-1-(oct-4-en-4-yl)-1H-1,2,4-triazole

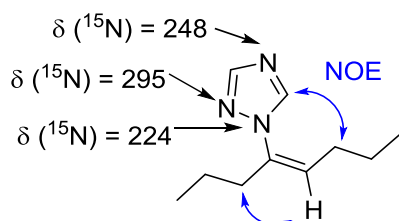

HMBC correlations ( $^2J$ )  $^1\text{H}$ - $^{15}\text{N}$

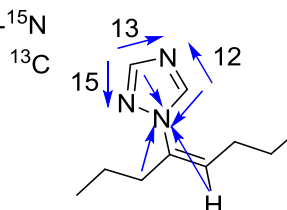

Colorless oil (volatile) (0.029 g, 74% yield using method A) or (from 1.1 mmol 1,2,4-triazole using method B, 0.124 g, 63% yield),  $R_f = 0.9$ , petroleum ether and triethylamine solvent mixture (95:5).

$^1\text{H}$  NMR ( $\text{CDCl}_3$ ):  $\delta$  8.07 (bs, 1H), 8.02 (bs, 1H), 5.53 (t, 1H,  $J = 7.5$ ), 2.45 (t, 2H,  $J = 7.2$ ), 1.91 (q, 2H,  $J = 7.5$ ), 1.36 (m, 4H), 0.89 (m, 6H, Me).

$^{13}\text{C}$  NMR ( $\text{CDCl}_3$ ):  $\delta$  152.0 (CH), 136.0 (C), 126.6 (2CH), 37.7 ( $\text{CH}_2$ ), 29.3 ( $\text{CH}_2$ ), 22.8 ( $\text{CH}_2$ ), 20.3 ( $\text{CH}_2$ ), 13.8 ( $\text{CH}_3$ ), 13.4 ( $\text{CH}_3$ ).

HRMS (ESI+):  $m/z$  calcd for  $\text{C}_{10}\text{H}_{18}\text{N}_3$  [ $\text{MH}^+$ ] 180.14952, found 180.14961.

**4gh (Z)-1-(oct-4-en-4-yl)-1H-imidazole**

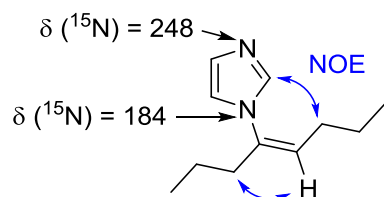

Colorless oil (0.009 g, 21% yield using method A) or (from 1.1 mmol imidazole using method B, 0.092 g, 47% yield),  $R_f = 0.3$ , petroleum ether and ethyl acetate solvent mixture (7:3).

$^1\text{H}$  NMR ( $\text{CDCl}_3$ ):  $\delta$  7.40 (s, 1H), 7.10 (s, 1H), 6.86 (s, 1H), 5.44 (t, 1H,  $J = 7.5$ ), 2.31 (t, 2H,  $J = 7.8$ ), 1.85 (q, 2H,  $J = 7.4$ ), 1.31 (m, 4H), 0.85 (m, 6H).

$^{13}\text{C}$  NMR ( $\text{CDCl}_3$ ):  $\delta$  137.0 (CH), 135.6 (C), 129.1 (CH), 126.3 (CH), 119.1 (CH), 39.1 ( $\text{CH}_2$ ), 29.0 ( $\text{CH}_2$ ), 22.8 ( $\text{CH}_2$ ), 20.3 ( $\text{CH}_2$ ), 13.8 ( $\text{CH}_3$ ), 13.4 ( $\text{CH}_3$ ).

HRMS (ESI<sup>+</sup>):  $m/z$  calcd for  $\text{C}_{11}\text{H}_{19}\text{N}_2$  [ $\text{MH}^+$ ] 179.15428, found 179.15434.

**6aa 1-(1,2-diphenylethyl)-1H-benzo[d][1,2,3]triazole<sup>10</sup>**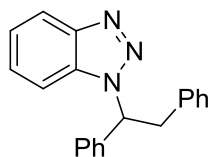

By using method C with 1 bar H<sub>2</sub> at 25°C during 15 h. White solid (0.037 g, 73% yield from 0.168 mmol of enamine), R<sub>f</sub> = 0.4, petroleum ether and ethyl acetate solvent mixture (95:5).

<sup>1</sup>H NMR (CDCl<sub>3</sub>): δ 8.12 (bd, 1H, *J* = 6.5), 7.42 (m, 8H), 7.23 (m, 5H), 6.08 (dd, 1H, *J* = 6.7), 4.27 (dd, 1H, *J* = 8.9), 3.87 (dd, 1H, *J* = 6.5).

<sup>13</sup>C NMR (CDCl<sub>3</sub>): δ 146.1 (C), 138.9 (C), 137.2 (C), 133.1 (C), 129.2 (2CH), 128.9 (2CH), 128.5 (2CH), 128.4 (CH), 127.2 (CH), 127.0 (2CH), 126.9 (CH), 123.9 (CH), 120.0 (CH), 109.7 (CH), 65.4 (CH), 41.5 (CH<sub>2</sub>).

**6ab 1-(1,2-diphenylethyl)-1H-1,2,3-triazole**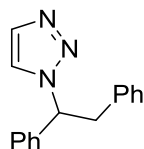

By using method D with 10 bar H<sub>2</sub> at 60°C during 15 h. White solid (0.049 g, 95% yield from 0.210 mmol of enamine) after filtration on Celite with ethylacetate.

<sup>1</sup>H NMR (CDCl<sub>3</sub>): δ 7.63 (bs, 1H), 7.43 (bs, 1H), 7.34 (m, 5H), 7.20 (m, 3H), 7.05 (m, 2H), 5.77 (dd, 1H, *J* = 6.9), 3.89 (dd, 1H, *J* = 8.9), 3.55 (dd, 1H, *J* = 6.6).

<sup>13</sup>C NMR (CDCl<sub>3</sub>): δ 138.6 (C), 136.8 (C), 133.6 (CH), 129.1 (2CH), 129.0 (2CH), 128.7 (CH), 128.6 (2CH), 127.2 (2CH), 127.0 (CH), 123.4 (CH), 66.9 (CH), 41.9 (CH<sub>2</sub>).

HRMS (ESI<sup>+</sup>): *m/z* calcd for C<sub>16</sub>H<sub>16</sub>N<sub>3</sub> [MH<sup>+</sup>] 250.13387, found 250.13365.

**6ad 1-(1,2-diphenylethyl)-3-methylimidazolidin-2-one**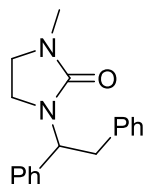

By using method C with 1 bar H<sub>2</sub> at 25°C during 8 h. White solid (0.022 g, 44% yield from 0.182 mmol of enamine), R<sub>f</sub> = 0.3, petroleum ether and ethyl acetate solvent mixture with 5% triethylamine (80:15:5).

<sup>1</sup>H NMR (CDCl<sub>3</sub>): δ 7.32 (m, 4H), 7.27 (m, 5H), 7.20 (m, 1H), 5.43 (dd, 1H, *J* = 7.1), 3.31 (m, 3H), 3.16 (m, 2H), 3.07 (m, 1H), 2.72 (s, 3H).

<sup>13</sup>C NMR (CDCl<sub>3</sub>): δ 161.1 (C), 139.5 (C), 138.4 (C), 128.9 (CH), 128.6 (CH), 128.5 (CH), 128.3 (CH), 127.9 (CH), 127.6 (CH), 126.4 (CH), 56.6 (CH), 45.3 (CH), 38.5 (CH), 36.9 (CH), 31.5 (CH).

HRMS (ESI<sup>+</sup>): *m/z* calcd for C<sub>18</sub>H<sub>21</sub>N<sub>2</sub>O [MH<sup>+</sup>] 281.16484, found 281.16522.

### 6be dimethyl 2-(1H-pyrazol-1-yl)succinate<sup>11</sup>

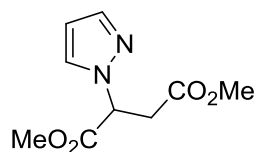

By using method C with 1 bar H<sub>2</sub> at 60°C during 15 h. Colorless oil (0.034 g, 67% yield from 0.236 mmol of enamine), R<sub>f</sub> = 0.6, petroleum ether and ethyl acetate solvent mixture using 5% triethylamine (75:20:5).

<sup>1</sup>H NMR (CDCl<sub>3</sub>):  $\delta$  7.51 (bd, 2H,  $J$  = 2.7), 6.26 (bd, 1H,  $J$  = 1.8), 5.38 (t, 1H,  $J$  = 6.6), 3.72 (bs, 3H, Me), 3.65 (bs, 3H, Me), 3.27 (qd, 2H,  $J$  = 1.8).

<sup>13</sup>C NMR (CDCl<sub>3</sub>):  $\delta$  170.6 (CO), 169.1 (CO), 140.2 (CH), 130.3 (CH), 106.2 (CH), 60.1 (CH), 53.2 (CH<sub>3</sub>), 52.3 (CH<sub>3</sub>), 36.3 (CH<sub>2</sub>).

### 6ca ethyl 3-(1H-benzo[d][1,2,3]triazol-1-yl)-3-phenylpropanoate

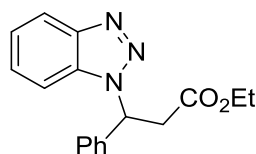

By using method D with 10 bar H<sub>2</sub> at 60°C during 72h. Pale yellow solid (0.024 g, 53% yield from 0.150 mmol of enamine), R<sub>f</sub> = 0.8, petroleum ether and ethyl acetate solvent mixture (8:2).

<sup>1</sup>H NMR (CDCl<sub>3</sub>):  $\delta$  7.98 (d, 1H,  $J$  = 8.3), 7.25 (m, 8H), 6.21 (dd, 1H,  $J$  = 5.7), 4.01 (q, 2H,  $J$  = 7.1), 3.89 (dd, 1H,  $J$  = 9.3), 3.29 (dd, 1H,  $J$  = 5.7), 1.06 (t, 3H,  $J$  = 7.1).

<sup>13</sup>C NMR (CDCl<sub>3</sub>):  $\delta$  170.1 (C), 146.3 (C), 138.3 (C), 133.1 (C), 129.2 (2CH), 128.8 (CH), 127.5 (CH), 126.9 (2CH), 124.2 (CH), 120.1 (CH), 109.9 (CH), 61.2 (CH<sub>2</sub>), 59.6 (CH), 40.5 (CH<sub>2</sub>), 14.1 (CH<sub>3</sub>).

HRMS (ESI+): m/z calcd for C<sub>17</sub>H<sub>18</sub>N<sub>3</sub>O<sub>2</sub> [MH<sup>+</sup>] 296.13935, found 296.13916.

### 6cb ethyl 3-phenyl-3-(1H-1,2,3-triazol-1-yl)propanoate

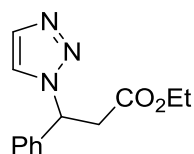

By using method C with 1 bar H<sub>2</sub> at 60°C during 30h. Orange solid (0.074 g, 63% yield from 0.480 mmol of enamine) after filtration over Celite with ethylacetate.

<sup>1</sup>H NMR (CDCl<sub>3</sub>):  $\delta$  7.64 (bd, 1H,  $J$  = 1.5), 7.51 (bs, 1H), 7.29 (5H, m), 6.04 (1H, dd,  $J$  = 6.1), 4.07 (bq, 2H,  $J$  = 6.8), 3.71 (dd, 1H,  $J$  = 9.7), 3.18 (dd, 1H,  $J$  = 5.9), 1.14 (t, 3H,  $J$  = 6.6).

<sup>13</sup>C NMR (CDCl<sub>3</sub>):  $\delta$  169.7 (C), 138.1 (C), 133.8 (CH), 129.2 (2CH), 128.9 (CH), 126.9 (2CH), 123.7 (CH), 61.2 (CH), 61.1 (CH<sub>2</sub>), 40.3 (CH<sub>2</sub>), 14.0 (CH<sub>3</sub>).

HRMS (ESI+): m/z calcd for C<sub>13</sub>H<sub>16</sub>N<sub>3</sub>O<sub>2</sub> [MH<sup>+</sup>] 246.12370, found 246.12331.

**6ce ethyl 3-phenyl-3-(1H-pyrazol-1-yl)propanoate<sup>6</sup>**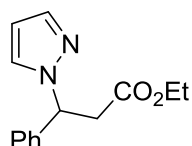

By using method C with 1 bar H<sub>2</sub> at 25°C during 15h. Colorless oil (0.054 g, 53% yield from 0.417 mmol of enamine) after filtration over Celite with ethylacetate.

<sup>1</sup>H NMR (CDCl<sub>3</sub>):  $\delta$  7.38 (d, 1H,  $J$  = 1.6), 7.29 (d, 1H,  $J$  = 2.3), 7.25 (m, 5H, H<sub>Ar</sub>), 6.21 (t, 1H,  $J$  = 2.0), 5.80 (dd, 1H,  $J$  = 5.9), 4.06 (q, 2H,  $J$  = 7.1), 3.57 (dd, 1H,  $J$  = 9.2), 3.08 (dd, 1H,  $J$  = 5.9), 1.12 (t, 3H,  $J$  = 7.1).

<sup>13</sup>C NMR (CDCl<sub>3</sub>):  $\delta$  171.5 (C), 139.8 (C), 139.5 (CH), 129.2 (CH), 128.9 (2CH), 128.3 (CH), 126.8 (2CH), 105.7 (CH), 61.9 (CH), 60.9 (CH<sub>2</sub>), 40.6 (CH<sub>2</sub>), 14.1 (CH<sub>3</sub>).

**6de 3-phenyl-3-(1H-pyrazol-1-yl)propanenitrile**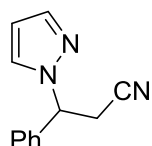

By using method D with 50 bar H<sub>2</sub> at 80°C during 15h. Colorless oil (0.049 g, 85% yield, from 0.294 mmol of enamine) after filtration over Celite with ethylacetate.

<sup>1</sup>H NMR (CDCl<sub>3</sub>):  $\delta$  7.62 (d, 1H,  $J$  = 1.5), 7.37 (m, 4H), 7.29 (m, 2H), 6.30 (t, 1H,  $J$  = 2.1), 5.60 (t, 1H,  $J$  = 7.2), 3.58 (dd, 1H,  $J$  = 7.8), 3.26 (dd, 1H,  $J$  = 6.7).

<sup>13</sup>C NMR (CDCl<sub>3</sub>):  $\delta$  140.3 (CH), 137.6 (C), 129.6 (CH), 129.3 (CH), 126.8 (CH), 116.9 (C, CN), 106.6 (CH), 61.7 (CH), 24.7 (CH<sub>2</sub>).

HRMS (ESI<sup>+</sup>):  $m/z$  calcd for C<sub>12</sub>H<sub>12</sub>N<sub>3</sub> [MH<sup>+</sup>] 198.10257, found 198.10239.

**6gc 1-(octan-4-yl)-1H-1,2,3-triazole**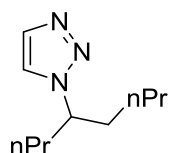

By using method D with 50 bar H<sub>2</sub> at 80°C during 72 h. Colorless oil (volatile) (0.074 g, 84% yield from 0.490 mmol of enamine) after filtration over Celite with ethylacetate.

<sup>1</sup>H NMR (CDCl<sub>3</sub>):  $\delta$  7.65 (bs, 1H), 7.47 (bs, 1H), 4.48 (m, 1H), 1.80 (m, 4H), 1.16 (m, 5H), 0.75 (m, 7H).

<sup>13</sup>C NMR (CDCl<sub>3</sub>):  $\delta$  133.6 (CH), 121.7 (CH), 61.9 (CH), 37.9 (CH<sub>2</sub>), 35.5 (CH<sub>2</sub>), 28.1 (CH<sub>2</sub>), 22.2 (CH<sub>2</sub>), 19.2 (CH<sub>2</sub>), 13.8 (CH<sub>3</sub>), 13.6 (CH<sub>3</sub>).

HRMS (ESI<sup>+</sup>):  $m/z$  calcd for C<sub>10</sub>H<sub>20</sub>N<sub>3</sub> [MH<sup>+</sup>] 182.16517, found 182.16536.



#### IV) NMR study of $^3J(^1\text{H}-^{15}\text{N})$ coupling constants and of $^{15}\text{N}$ chemical shifts.

**Figure S1:**  $^{15}\text{N}$  chemical shifts  $\delta$ (ppm) of aza-heterocycles according the bibliography.<sup>12,13</sup>

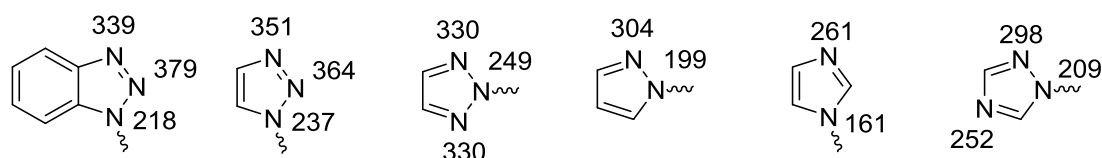

**Figure S2.** Study of the  $^3J(^1\text{H}-^{15}\text{N})$  coupling constants of the enamines **4** and **5**.<sup>14</sup>

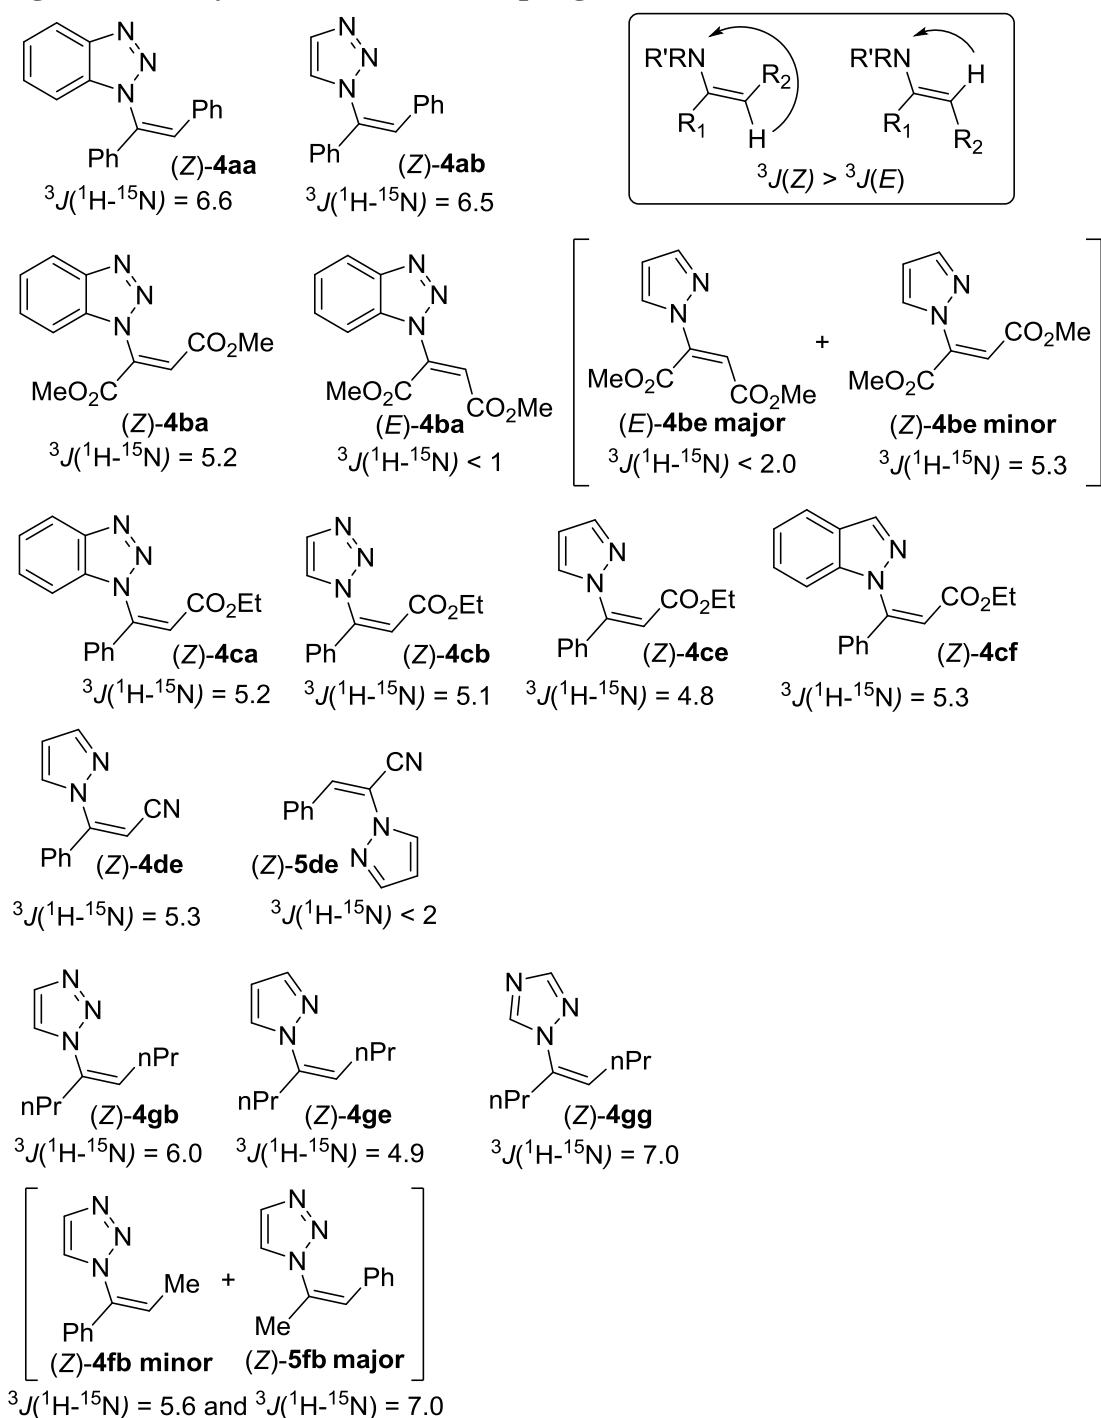

# V) Hydrogenation of enamines 4: screening of the reaction conditions.

**Table S1. Screening of the hydrogenation conditions of enamine 4aa.**

4aa  6aa

| Entry | Solvent | Catalyst loading<br>(mol%) | T.<br>(°C) | H <sub>2</sub><br>(bar) | t<br>(h) | Yield<br>(%) <sup>a</sup> |
|-------|---------|----------------------------|------------|-------------------------|----------|---------------------------|
| 1     | EtOH    | 1.4                        | RT         | 1                       | 3        | 36                        |
| 2     | THF     | 1.4                        | RT         | 1                       | 3        | 26 <sup>b</sup>           |
| 3     | AcOEt   | 1.4                        | RT         | 1                       | 3        | 35                        |
| 4     | AcOEt   | 1.4                        | RT         | 1                       | 15       | 100                       |
| 5     | EtOH    | 1.4                        | RT         | 1                       | 15       | 100 <sup>b</sup>          |
| 6     | AcOEt   | 1.4                        | 60         | 5                       | 3        | 42                        |
| 7     | AcOEt   | 1                          | RT         | 1                       | 15       | 100                       |
| 8     | EtOH    | 1                          | RT         | 1                       | 15       | 97 <sup>b</sup>           |

<sup>a</sup> GC yield. <sup>b</sup> several by-products were formed.

## VI) References

- [1] a) **1a**: S. Gaillard, A. M. Z. Slawin, S. P. Nolan, *Chem. Commun.*, 2010, **46**, 2742; b) **1b**: L. Ricard, F. Gagosz, *Organometallics*, 2007, **26**, 4704; c) **1b**: R. M. P. Veenboer, D. Gasperini, D. B. Cordes, A. M. Z. Slawin, C. S. J. Cazin, S. P. Nolan, *Organometallics*, 2017, **36**, 3645; d) **1c**: R. S. Ramon, S. Gaillard, A. Poater, L. Cavallo, A. M. Z. Slawin, S. P. Nolan, *Chem. Eur J.*, 2011, **17**, 1238.
- [2] H. Duan, W. Yan, S. Sengupta, X. Shi, *Bioorg. Med. Chem. Lett.*, 2009, **19**, 3899.
- [3] a) İ. Çelik, F. Yıldız, *Tetrahedron*, 2017, **73**, 3878; b) a) N. Al-Jalal, M. Ibrahim, N. Al-Awadi, M. Elnagdi, Y. Ibrahim, *Molecules*, 2014, **19**, 20695; c) A. R. Katritzky, G. J. Hitchings, X. Zhao, *J. Chem. Soc., Perkin Trans. 1*, 1990, **9**, 2371.
- [4] H. K. Reimlinger, C. H. Moussebois, *Chemische Berichte*, 1965, **98**, 1805.
- [5] M. Cox, F. Heidarizadeh, R. H. Prager, *Aust. J. Chem.*, 2000, **53**, 665.
- [6] G. Luo, L. Chen, *Tetrahedron Lett.*, 2015, **56**, 6276.
- [7] S. Krishnan, R. M. Miller, B. Tian, R. D. Mullins, M. Jacobson, J. Taunton, *J. Am. Chem. Soc.*, 2014, **136**, 12624.
- [8] A. G. Mal'kina, Y. M. Skvortsov, B. A. Trofimov, D. S. Taryashinova, N. N. Chipanina, A. N. Volkov, V. V. Keiko, A. G. Proidakov, T. N. Aksamentova, E.S. Domnina, *Zhurnal Org. Khimii*, 1981, **17**, 2438.
- [9] a) V. Garg, P. Kumar, A. K. Verma, *J. Org. Chem.*, 2017, **82**, 10247; b) T. Tsuchimoto, K. Aoki, T. Wagatsuma, Y. Suzuki, *Eur. J. Org. Chem.*, 2008, **2008**, 4035.
- [10] Y. H. Kang, K. Kim, *Tetrahedron*, 1999, **55**, 4271.
- [11] a) I. H. Reimlinger, J. F. M. Oth, F. Billiau, *Chemische Berichte*, 1964, **97**, 331; b) P. Zaderenko, P. Lopez, P. Ballesteros, H. Takumi, F. Toda, *Tetrahedron: Asymmetry*, 1995, **6**, 381.
- [12] J. Mason, L. F. Larkworthy, E. A. Moore, *Chem. Rev.*, 2002, **102**, 913.
- [13] a) G. J. Martin, M. L. Martin, J. P. Gouesnard (1981), "<sup>15</sup>N-NMR spectroscopy" in *"NMR basic principles and progress"*, Vol. 18, Springer, Berlin; b) S. Berger, S. Braun, H.-O. Kalinowski (1997), *NMR spectroscopy of the non-metallic elements*, John Wiley & Sons, Chichester.
- [14] a) H. Ahlbrecht and G. Papke, *Tetrahedron*, 1974, **30**, 2571; b) L. Kozerski, K. Kamienska-Trela, L. Kania and W. Von Philipsborn, *Helv. Chim. Acta*, 1983, **66**, 2113; c) L. Kozerski, B. Kwiecien, R. Kawecki, Z. Urbanczyk-Lipkowska, W. Bocian, E. Bednarek, J. Sitkowski, J. Maurin, L. Pazderski, P. E. Hansen, *New J. Chem.*, 2004, **28**, 1562; d) L. I. Larina, V. G. Rozinov, M. Y. Dmitrichenko, L. A. Es'kova, *Magn. Reson. Chem.*, 2009, **47**, 149.

VII)  $^1\text{H}$ ,  $^{13}\text{C}$  NMR spectra of isolated compounds.

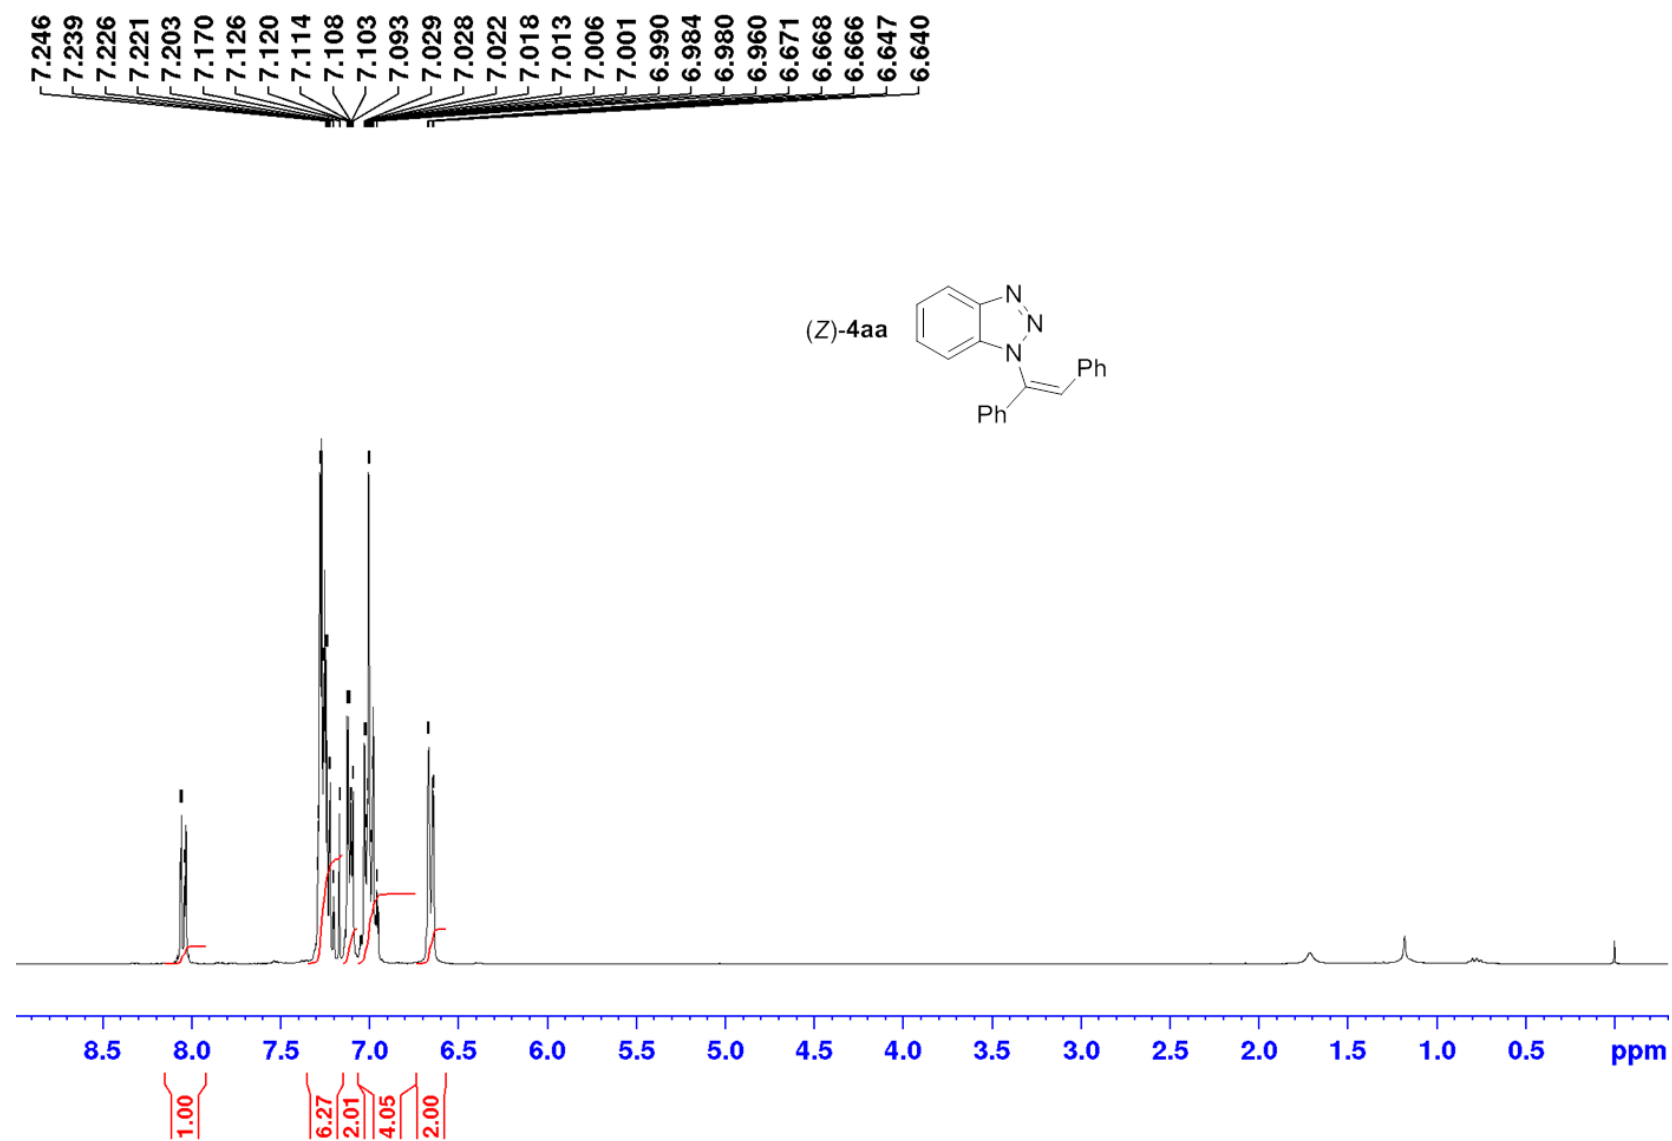

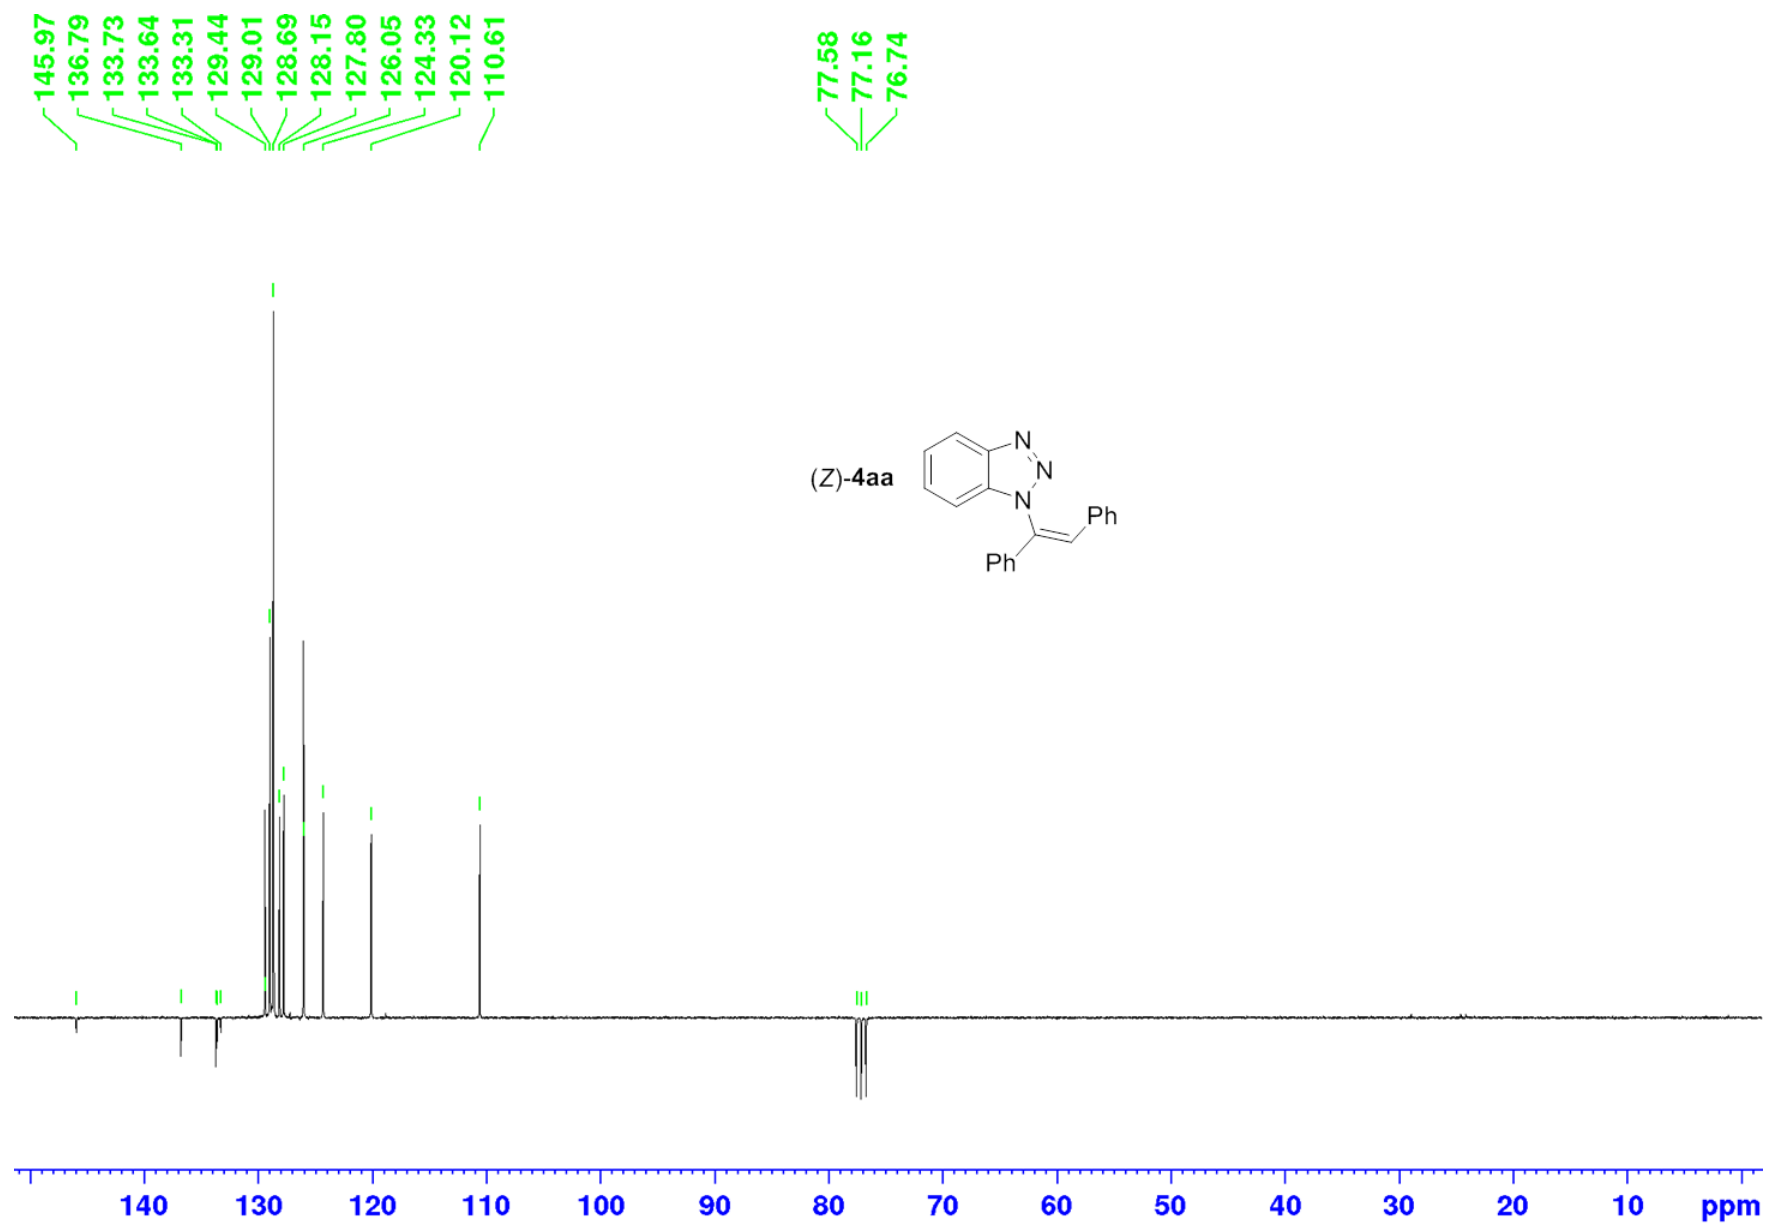

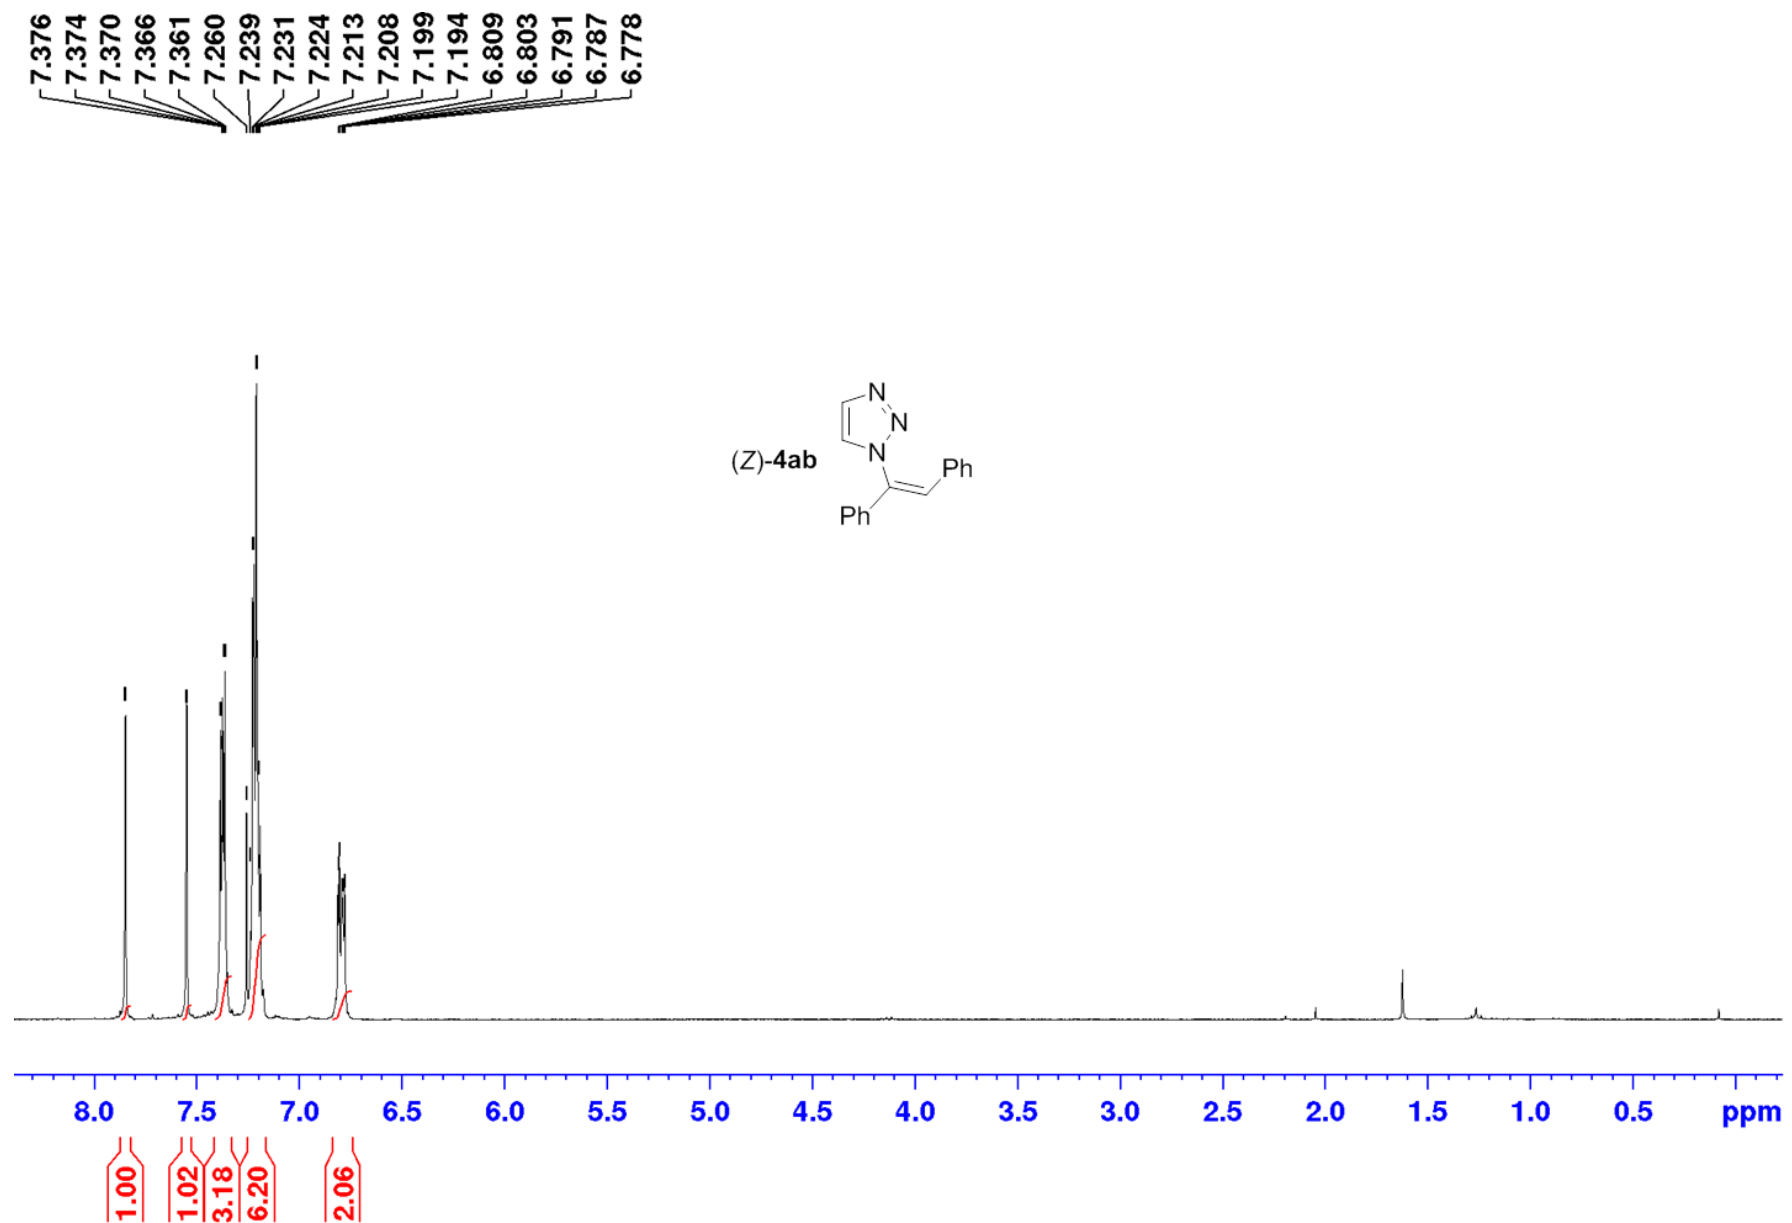

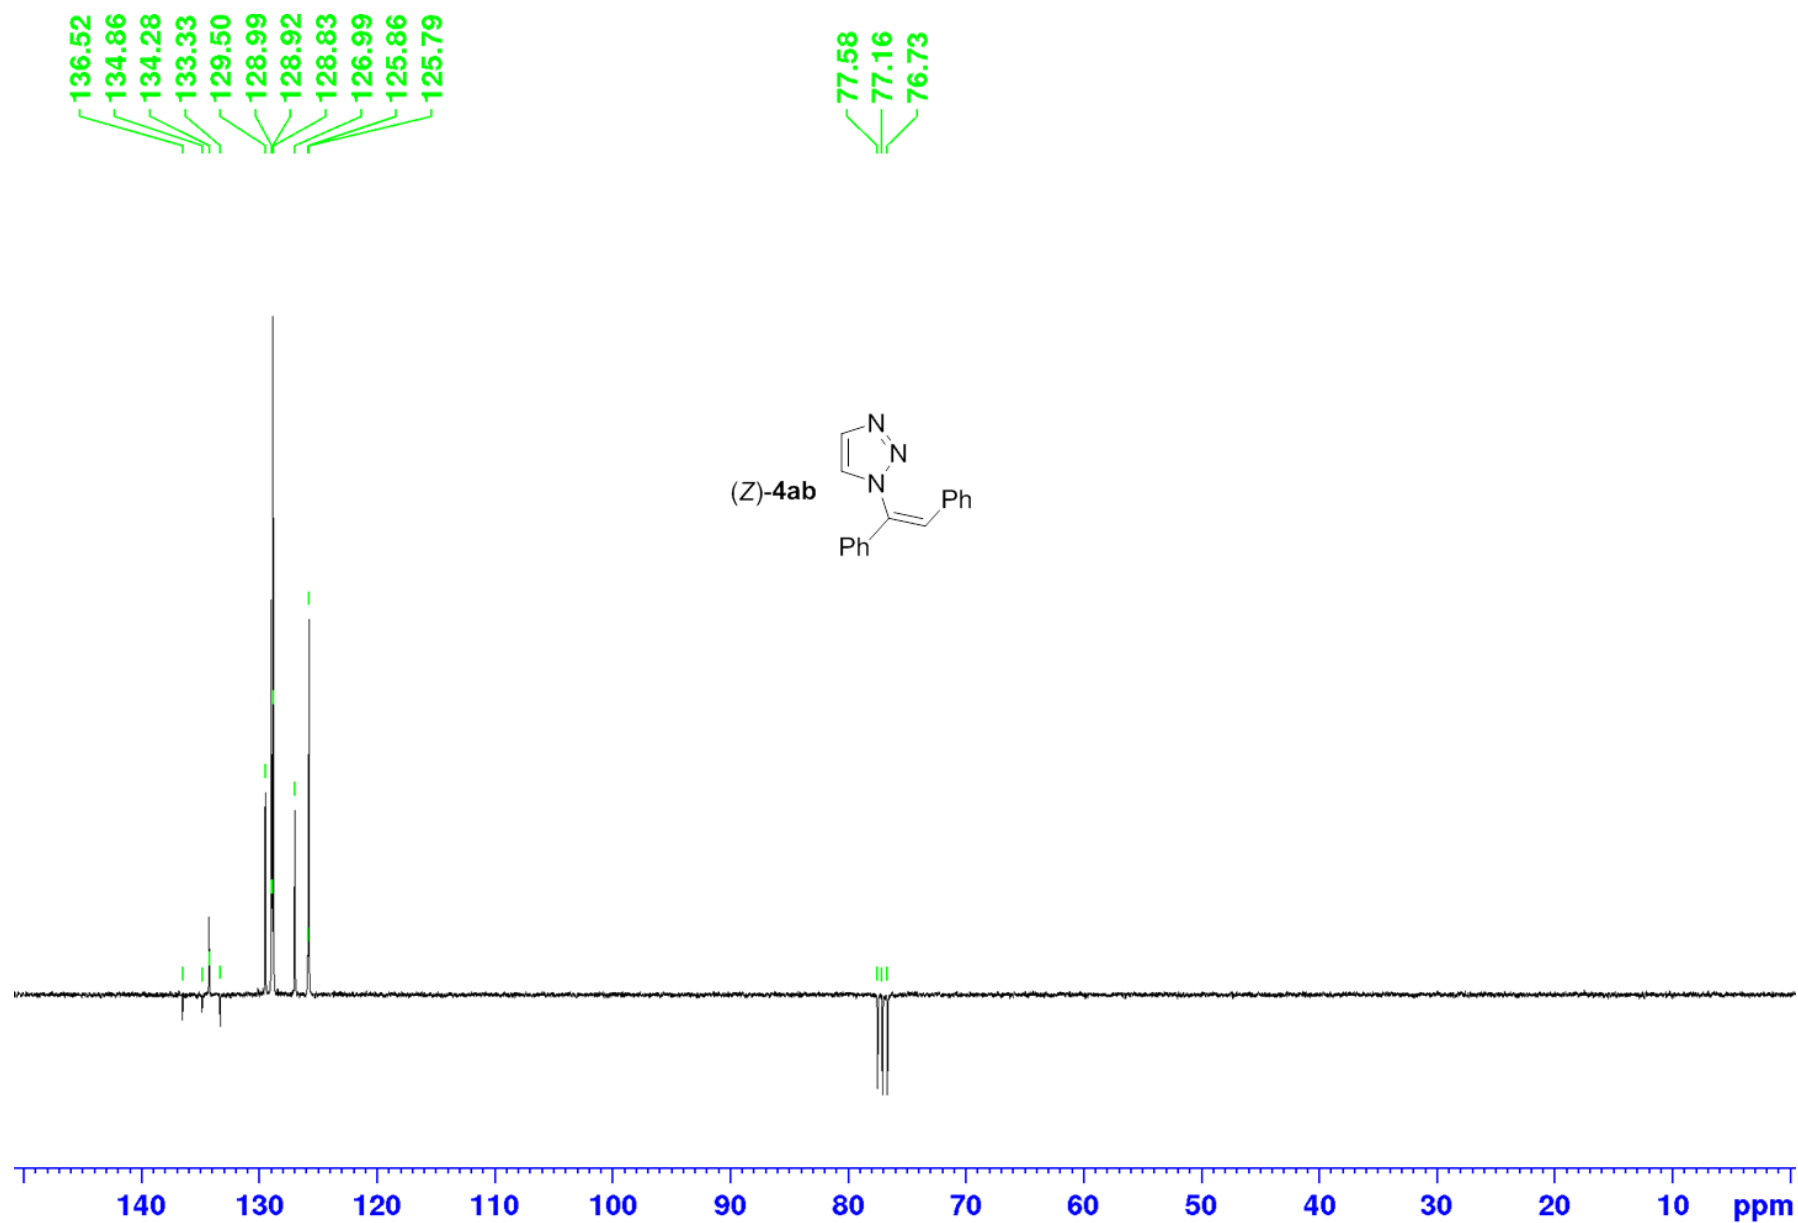

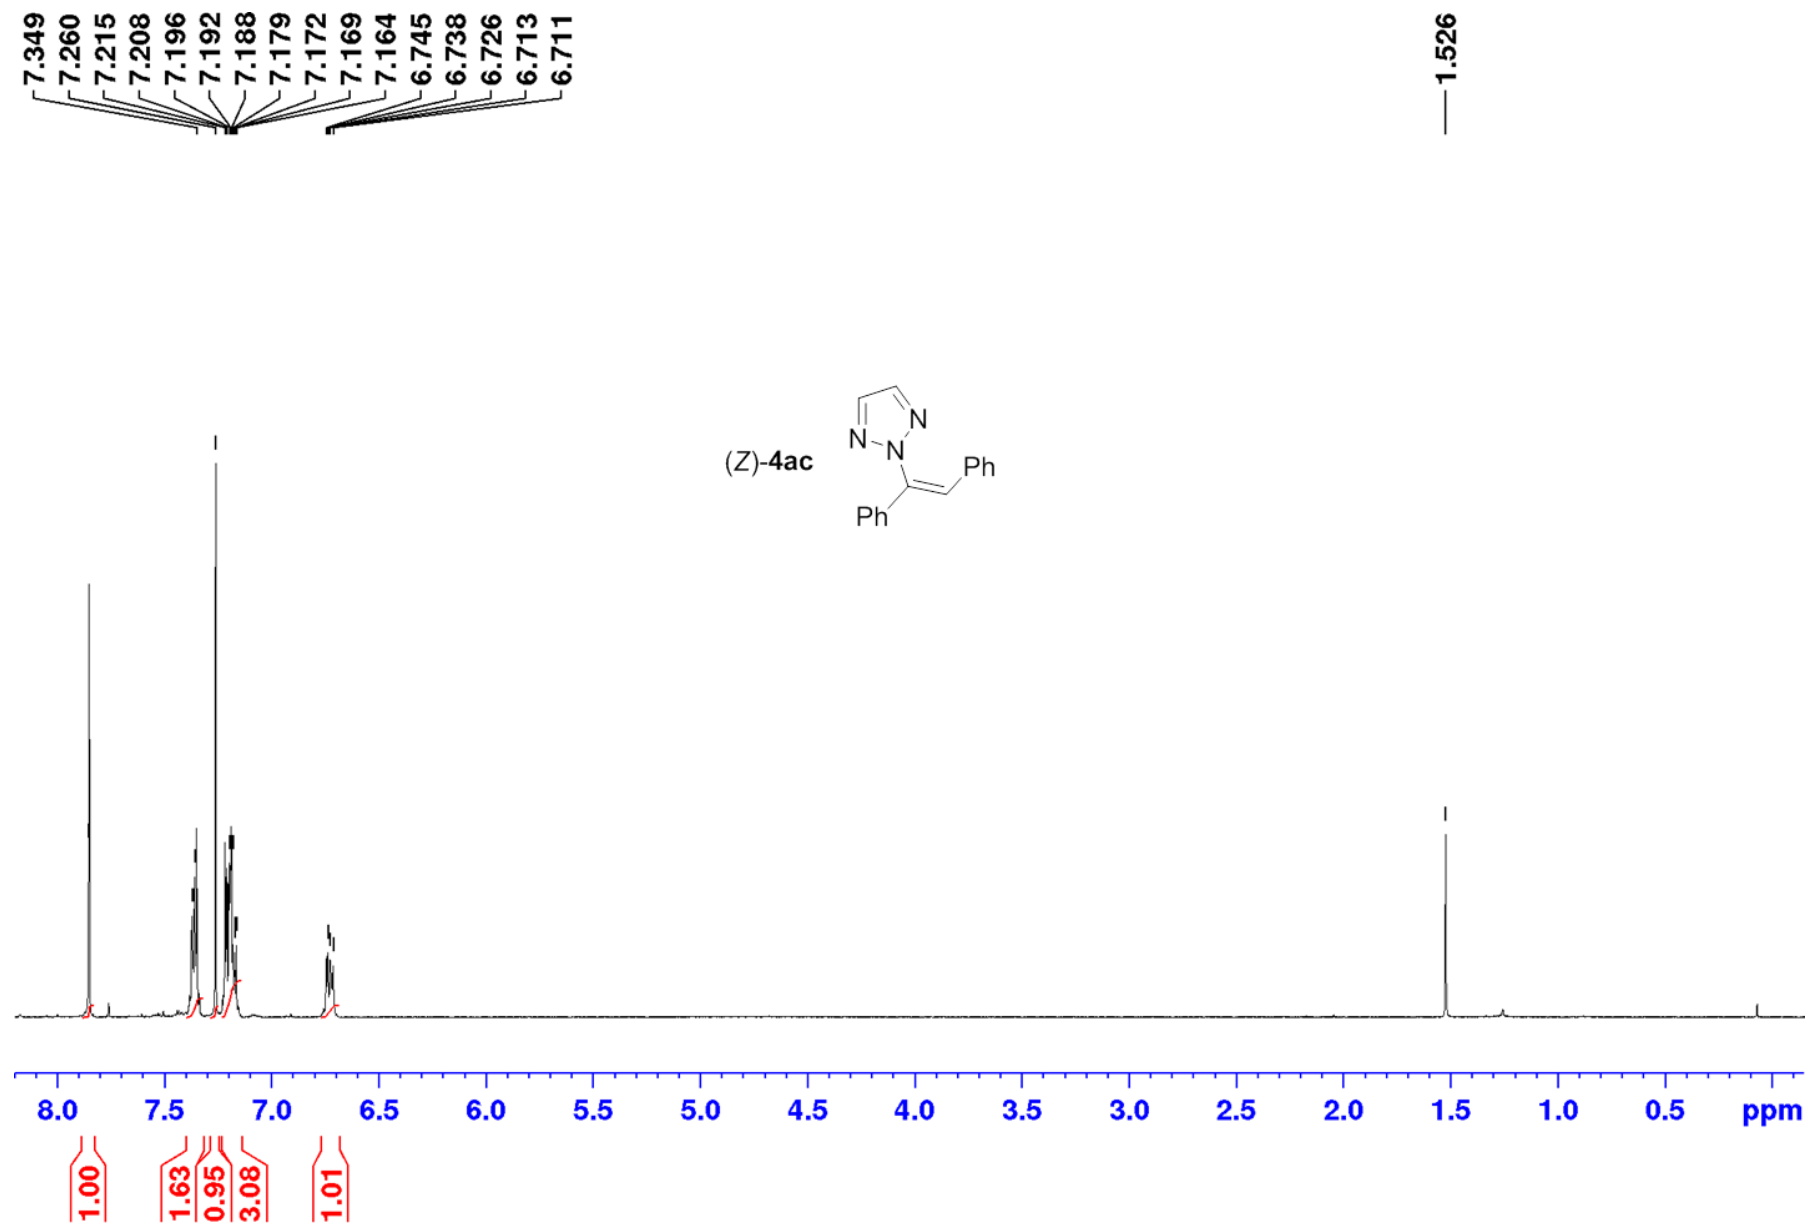



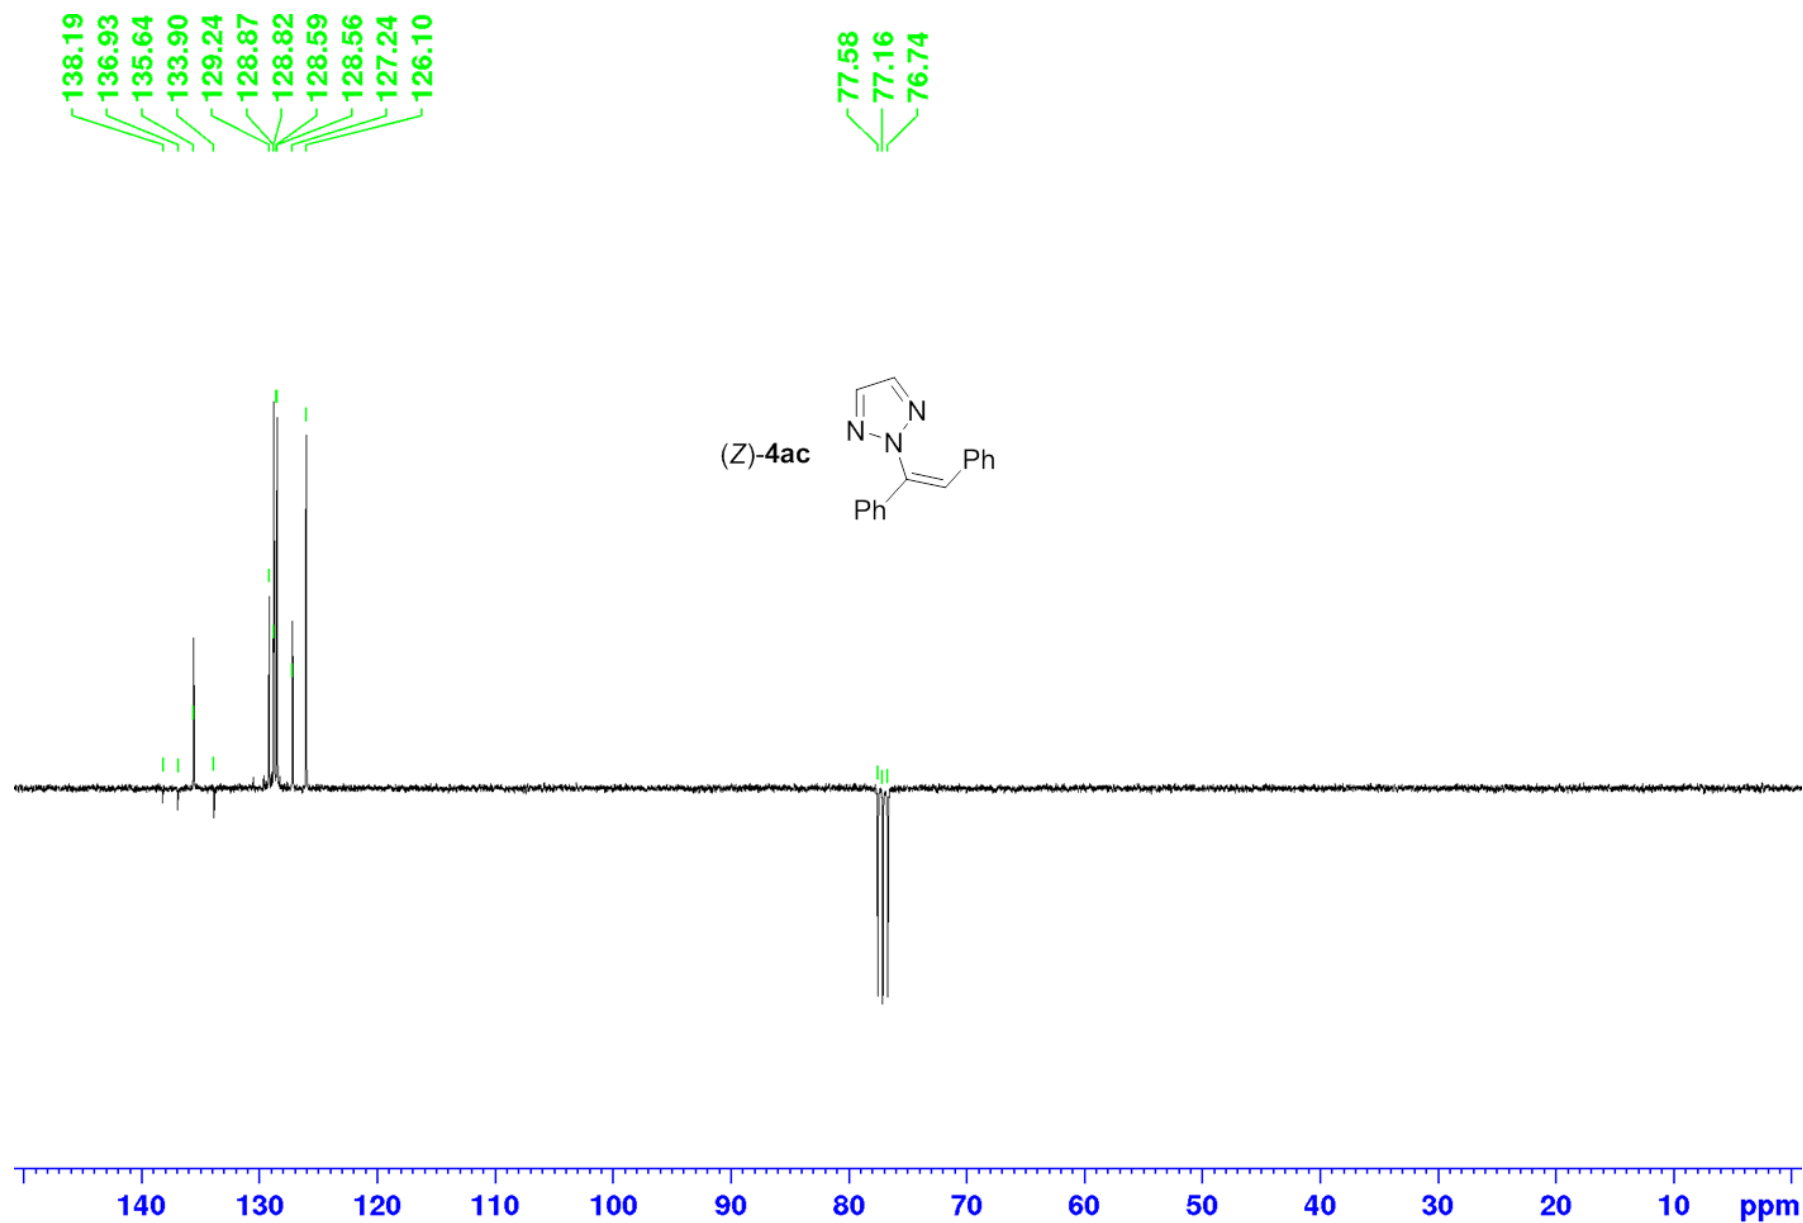

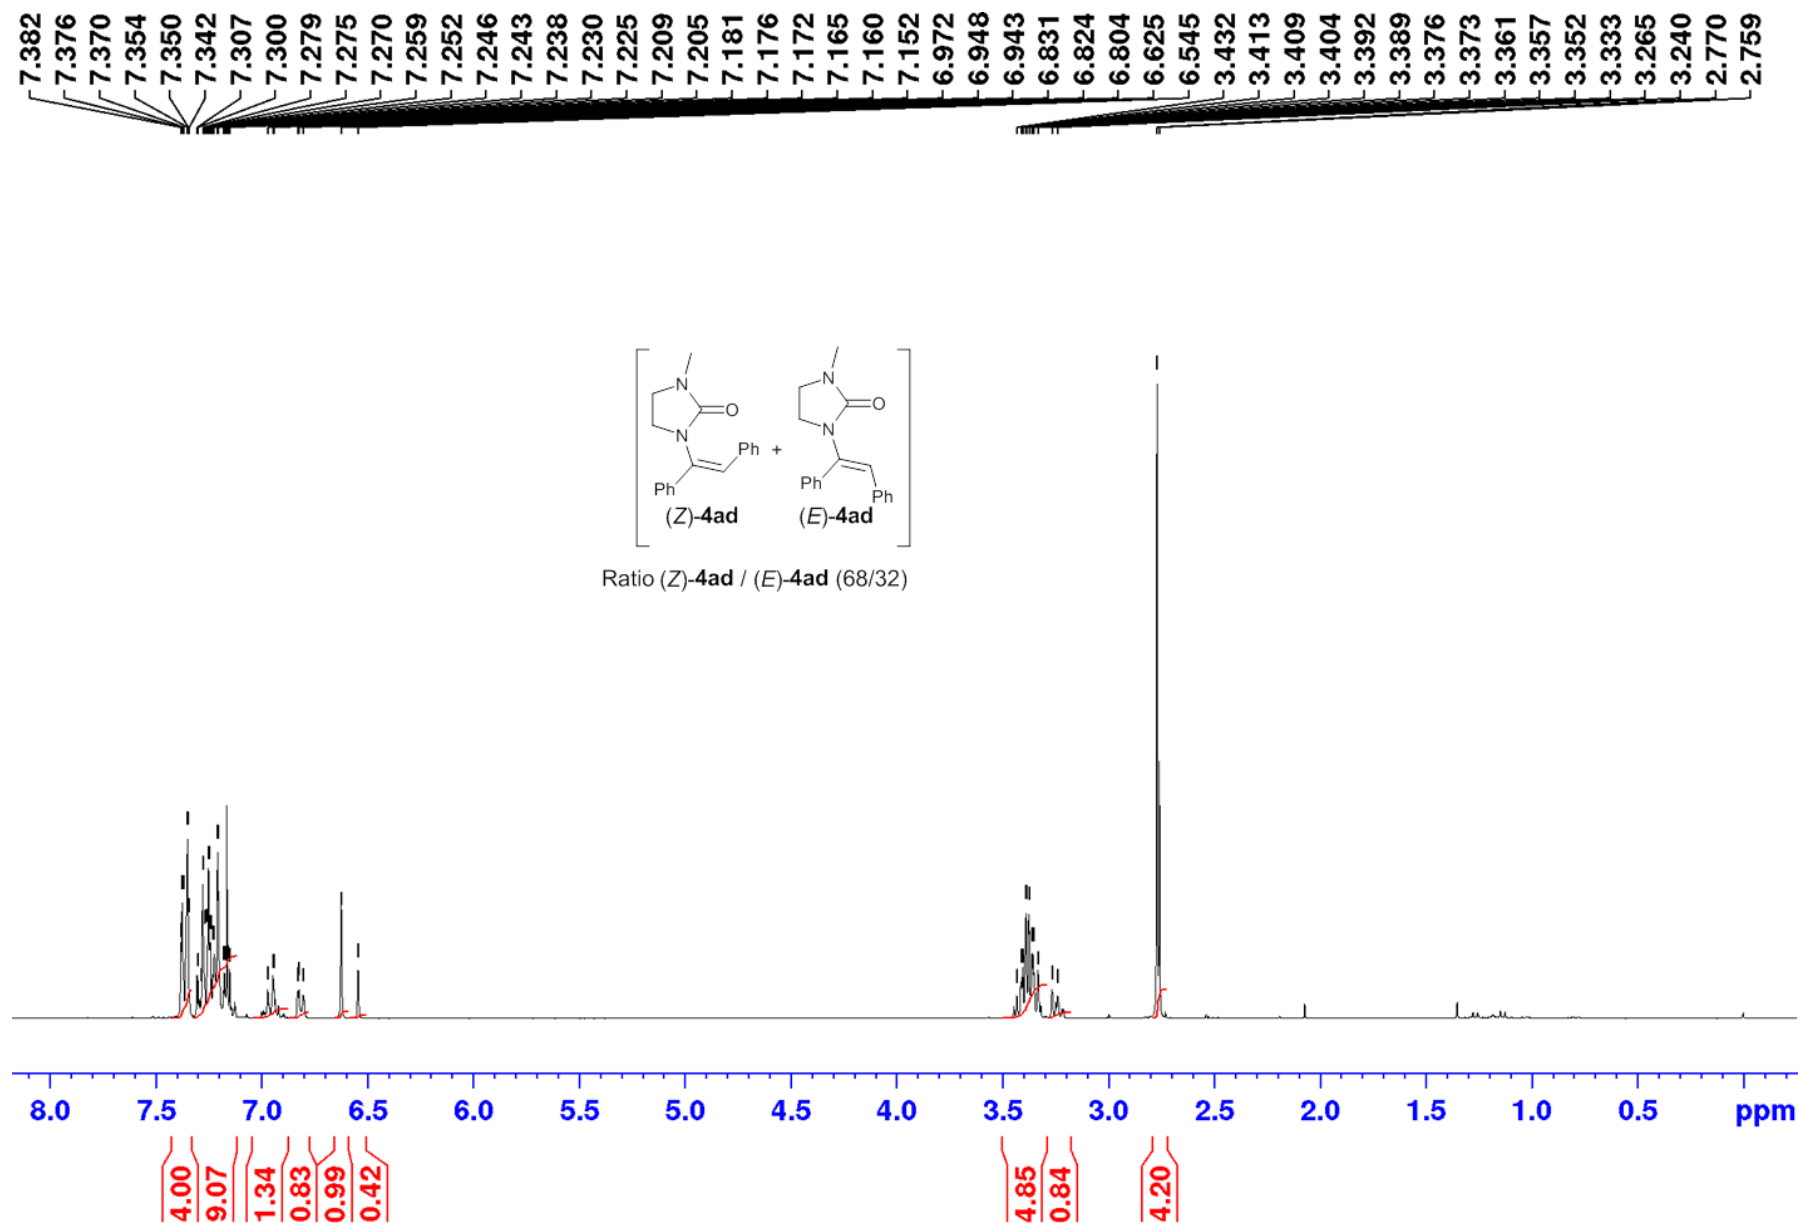

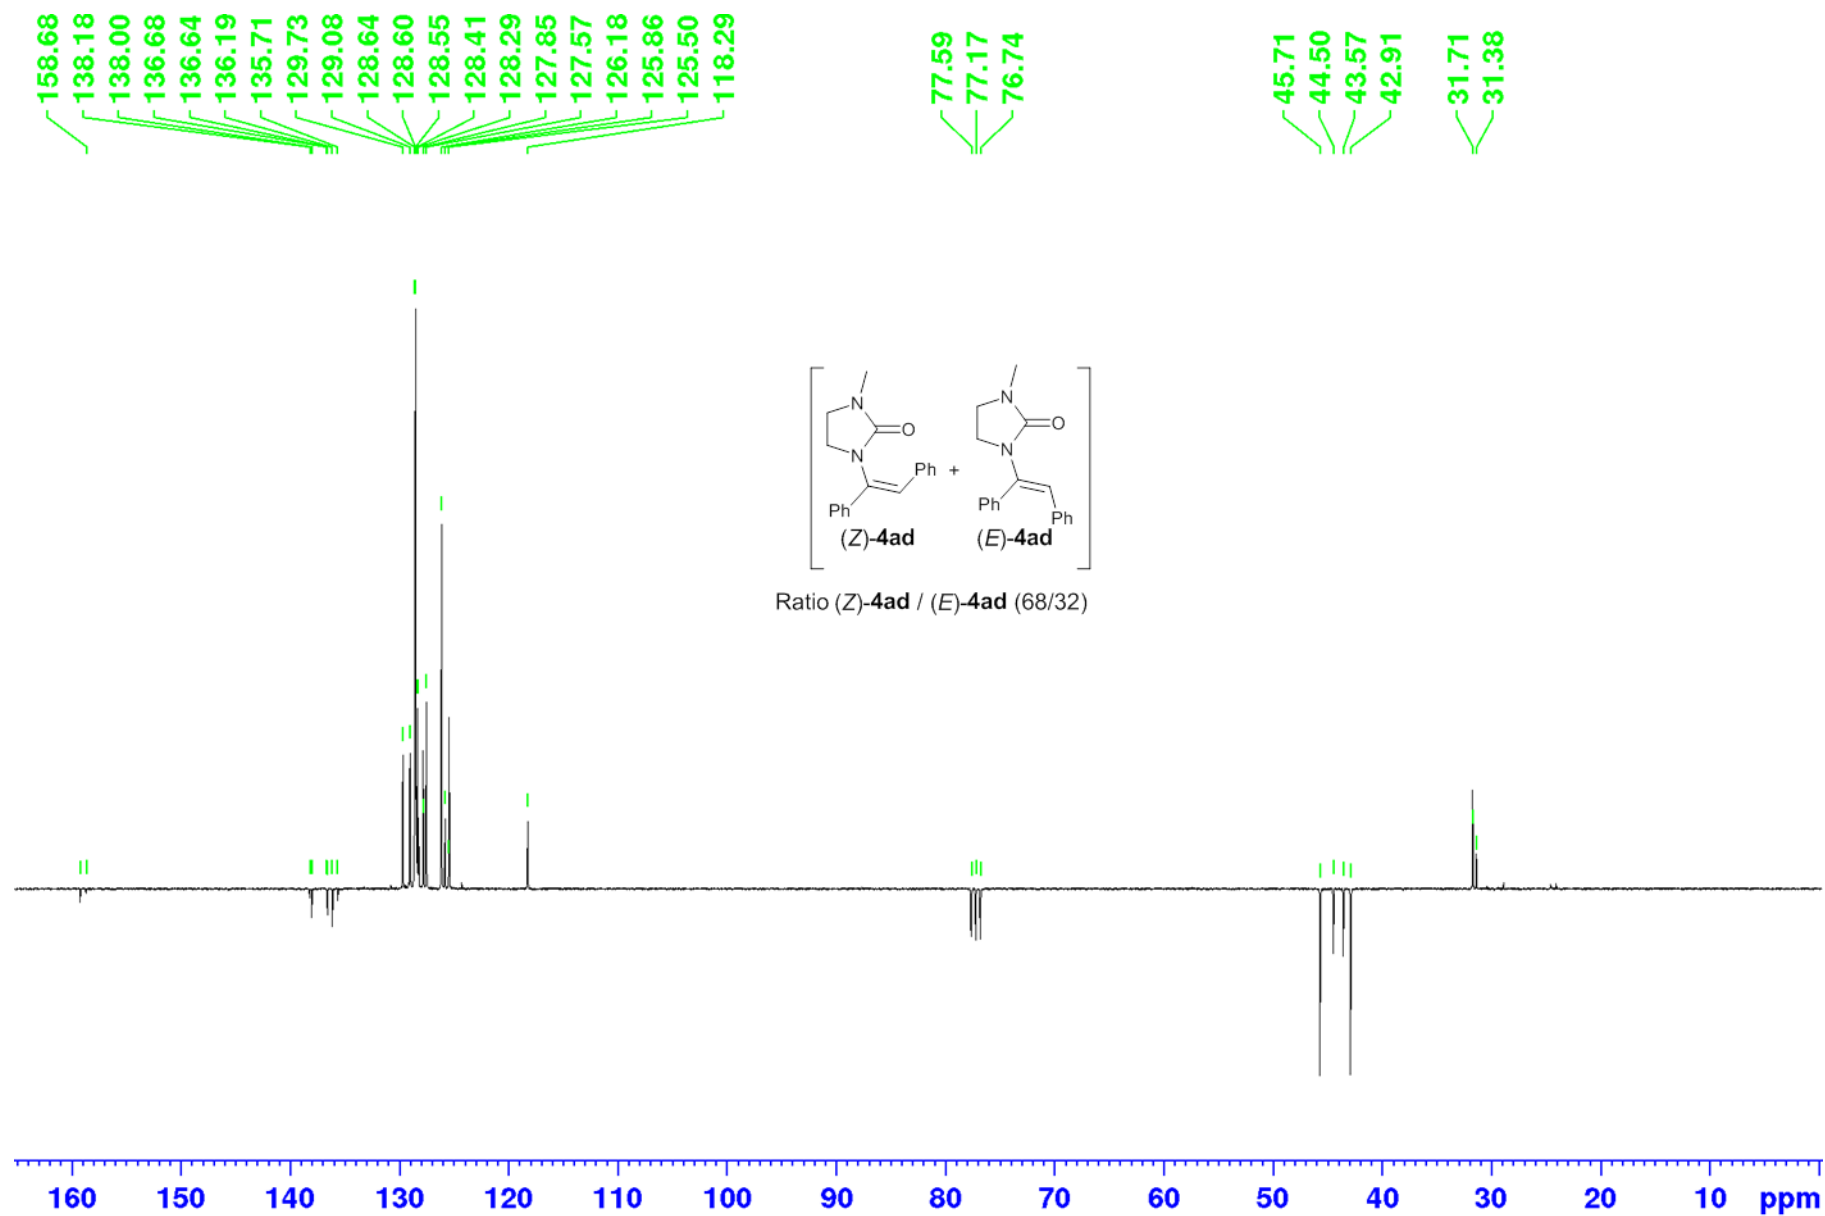

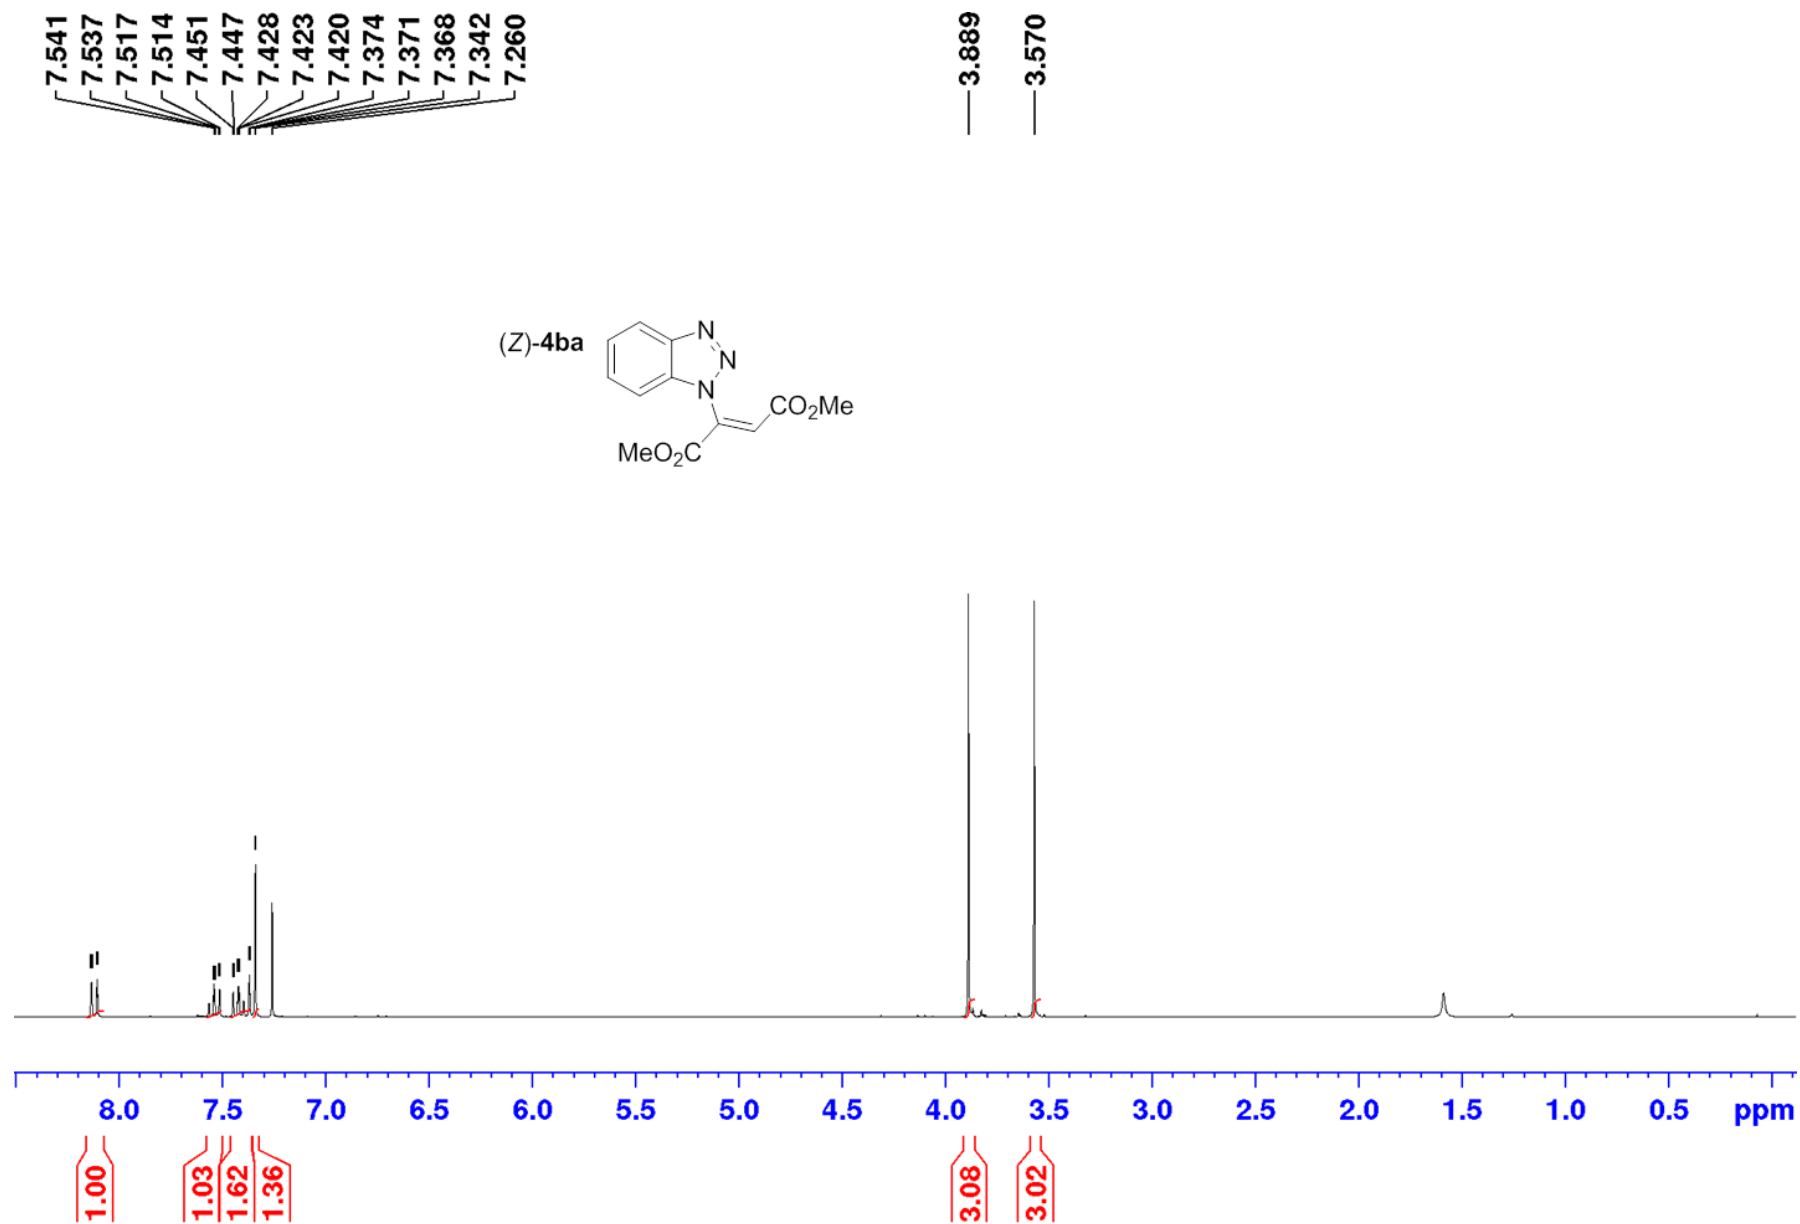

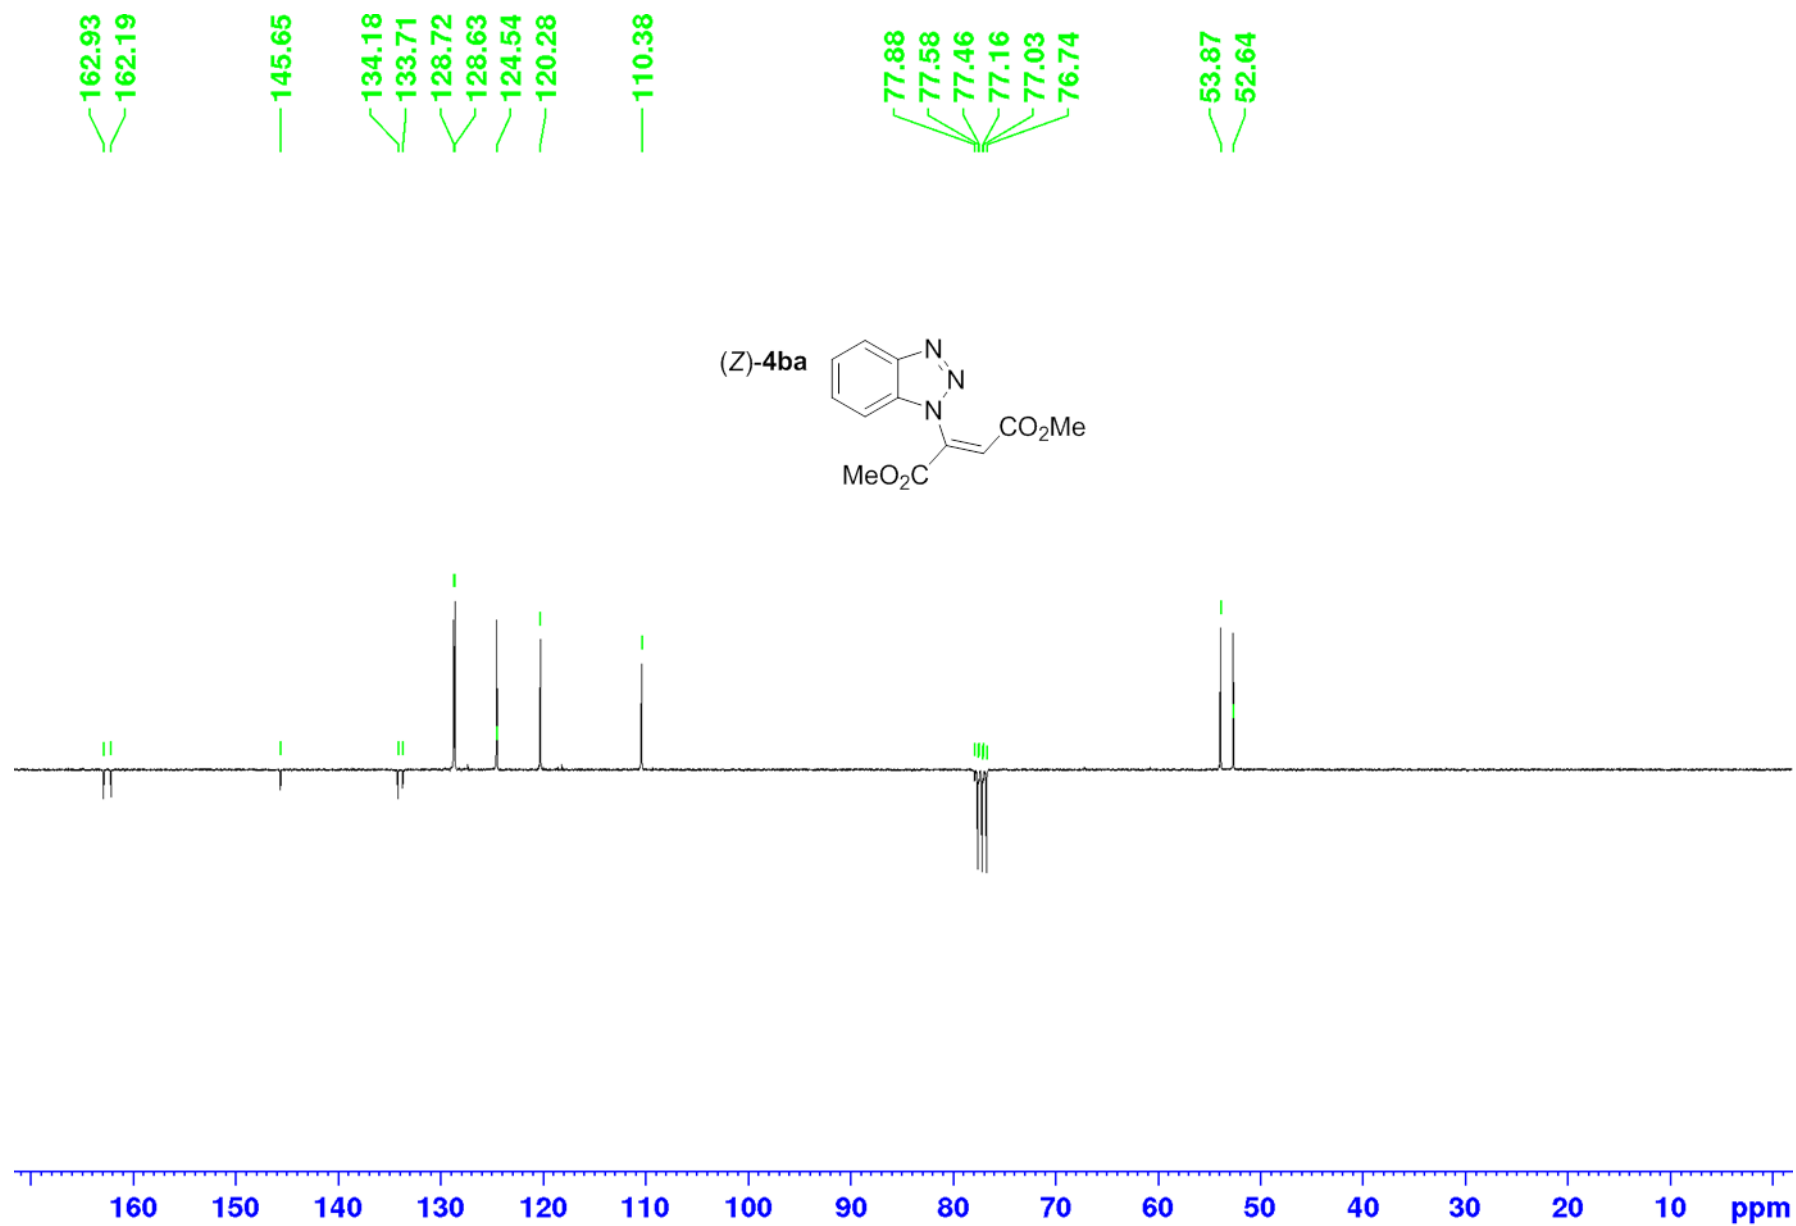

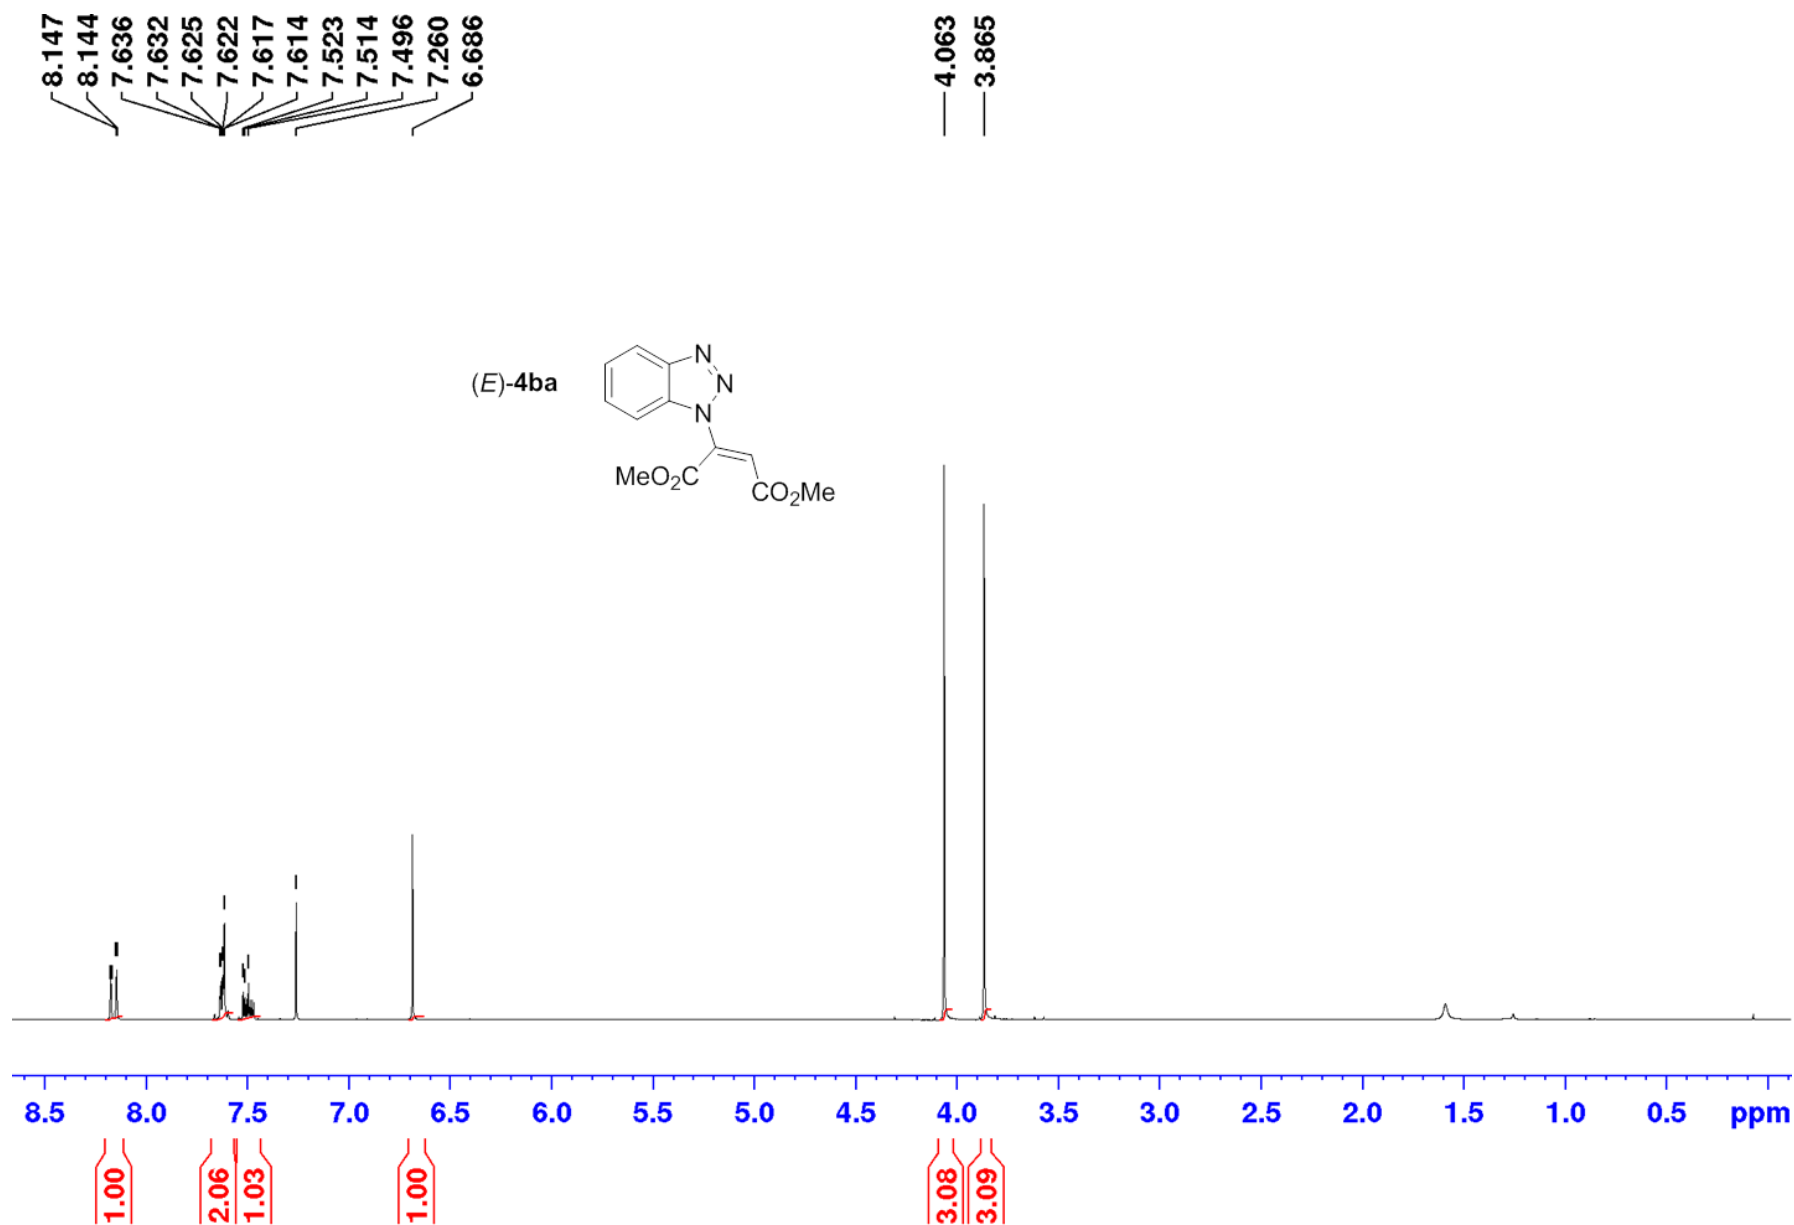

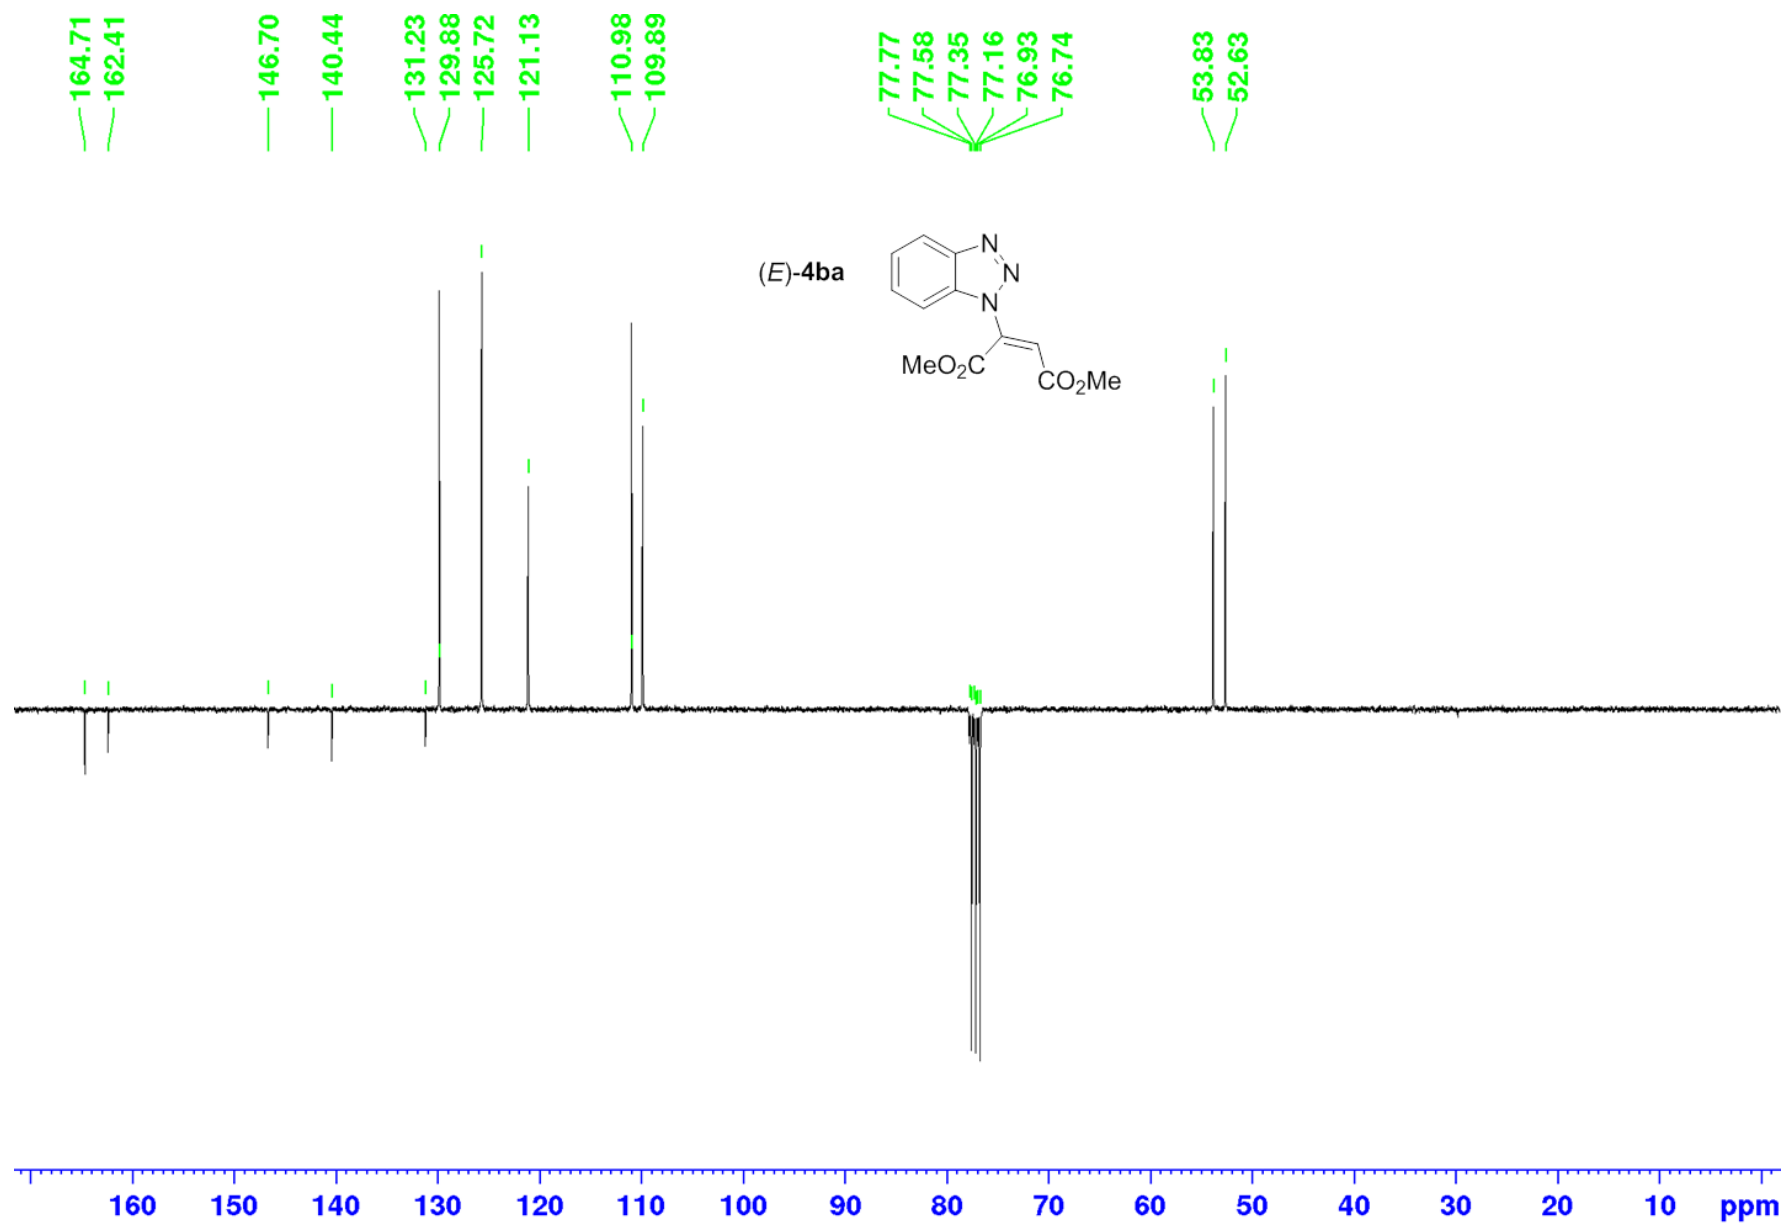

7.727  
7.722  
7.645  
7.636  
7.635  
7.254  
6.835  
6.464  
6.459  
6.455  
6.450  
6.409  
6.403  
6.400  
6.391

4.008  
3.889  
3.794  
3.774  
3.759  
3.703

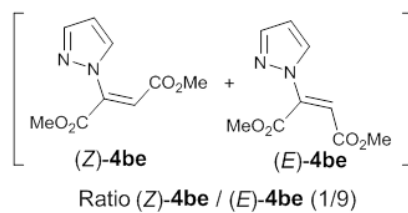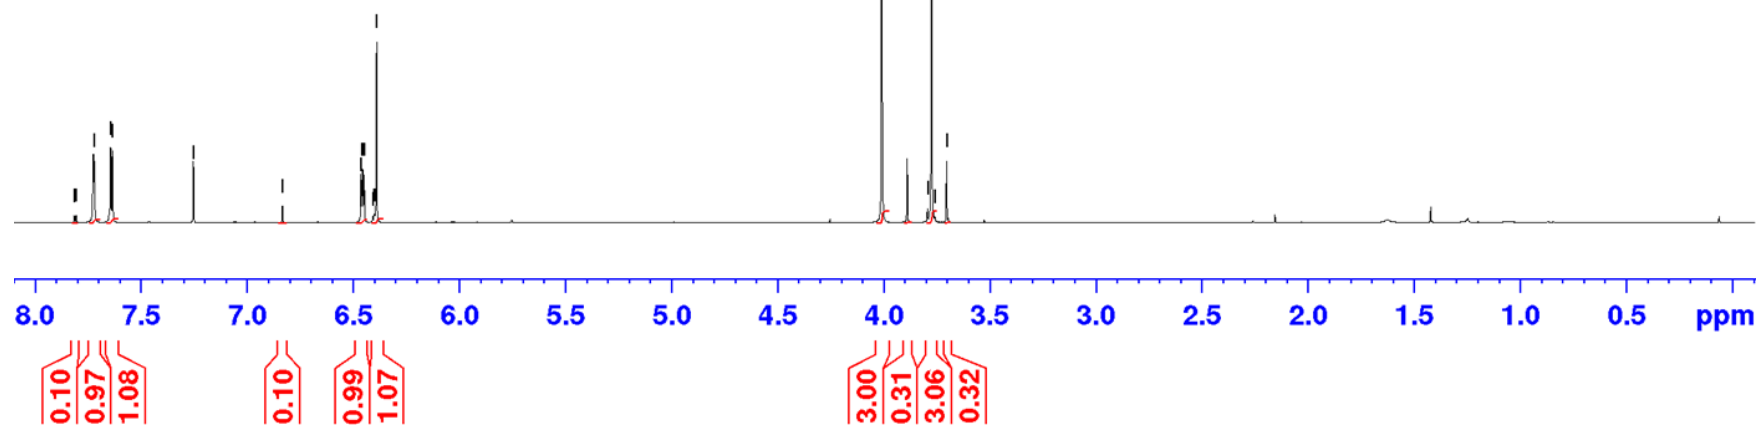



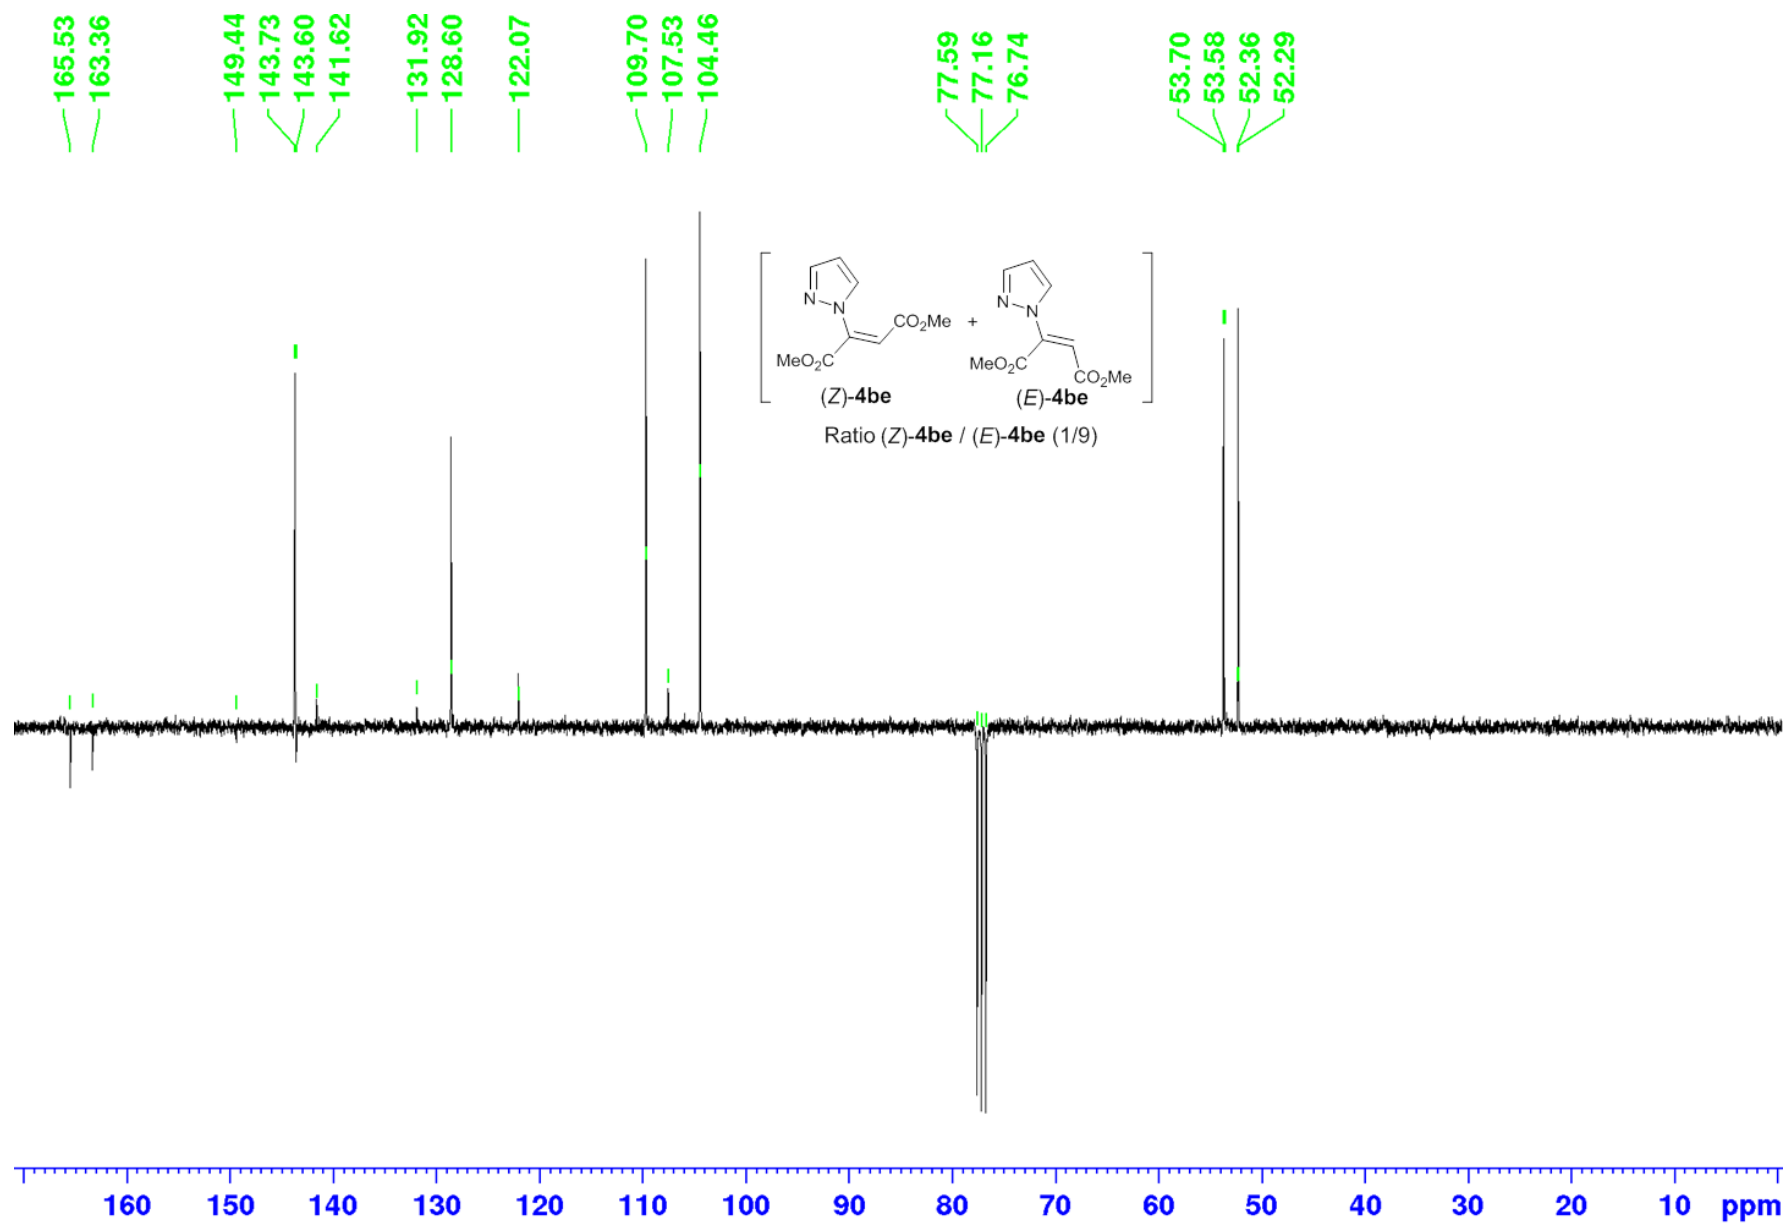

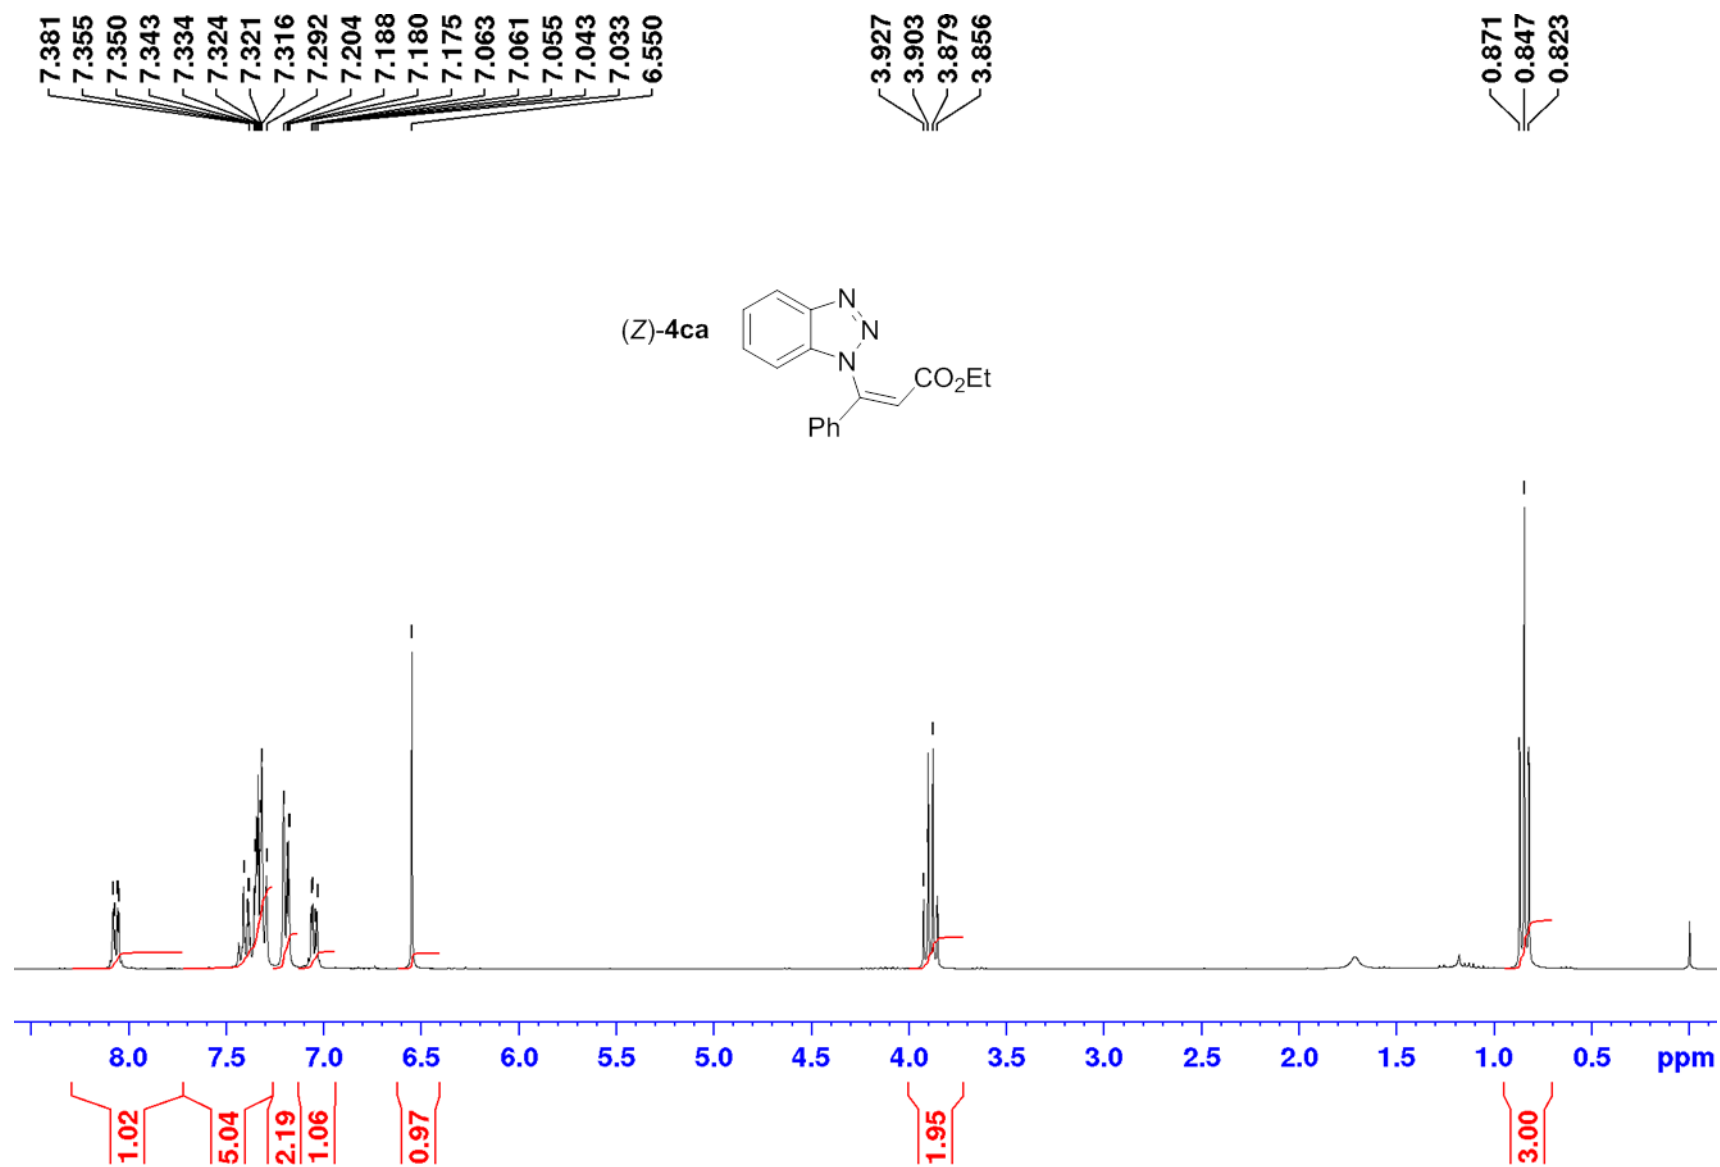

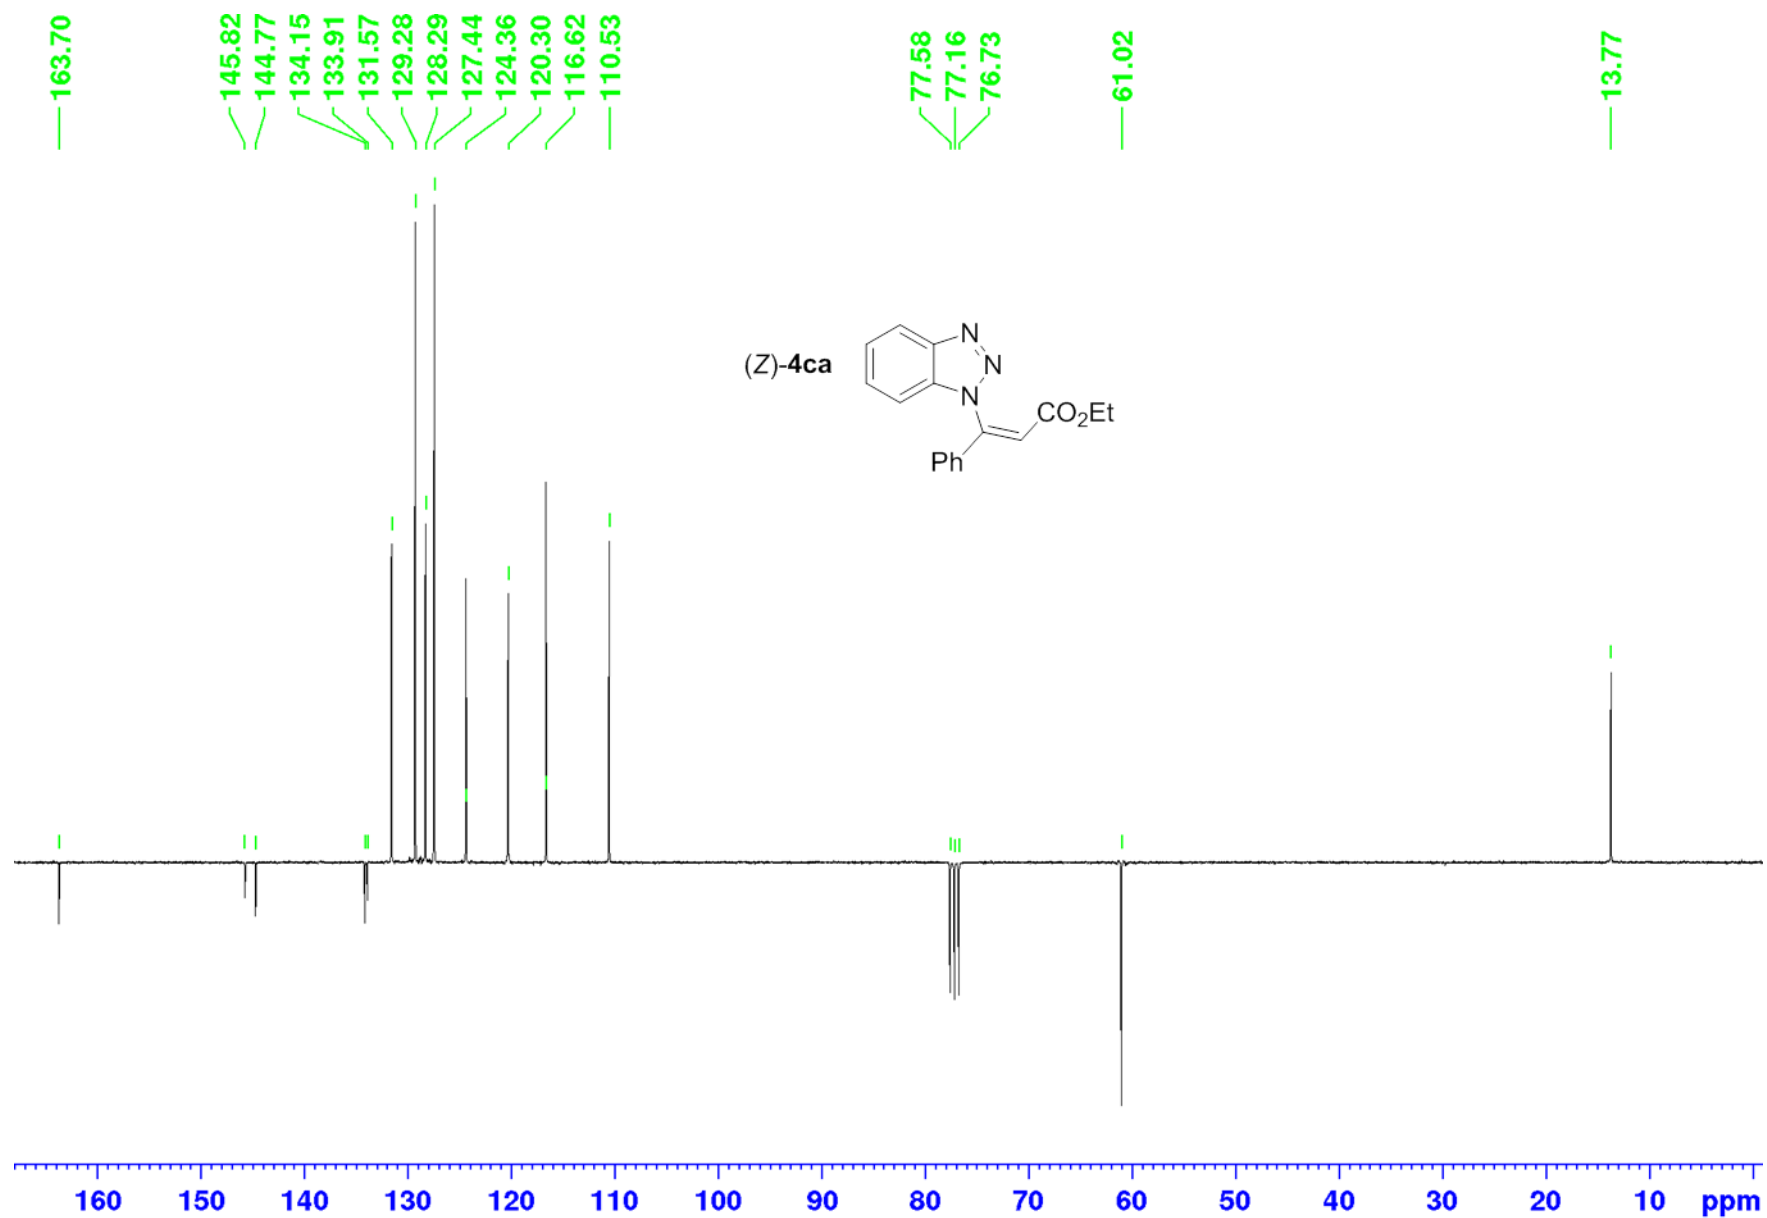

7.763  
7.659  
7.402  
7.378  
7.348  
7.322  
7.299  
7.154  
7.130  
7.126  
— 6.419

4.067  
4.043  
4.019  
3.995

1.112  
1.089  
1.065

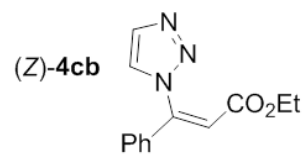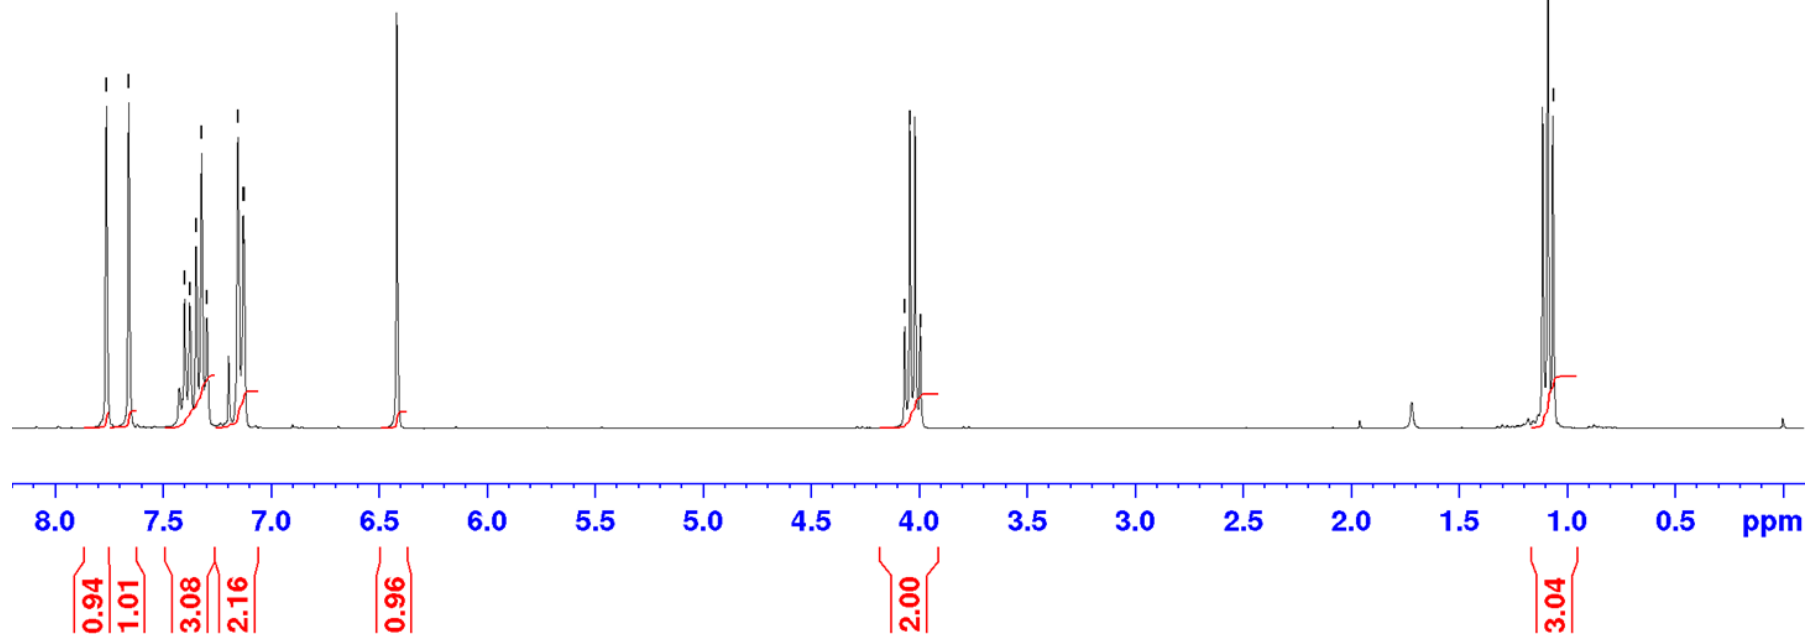

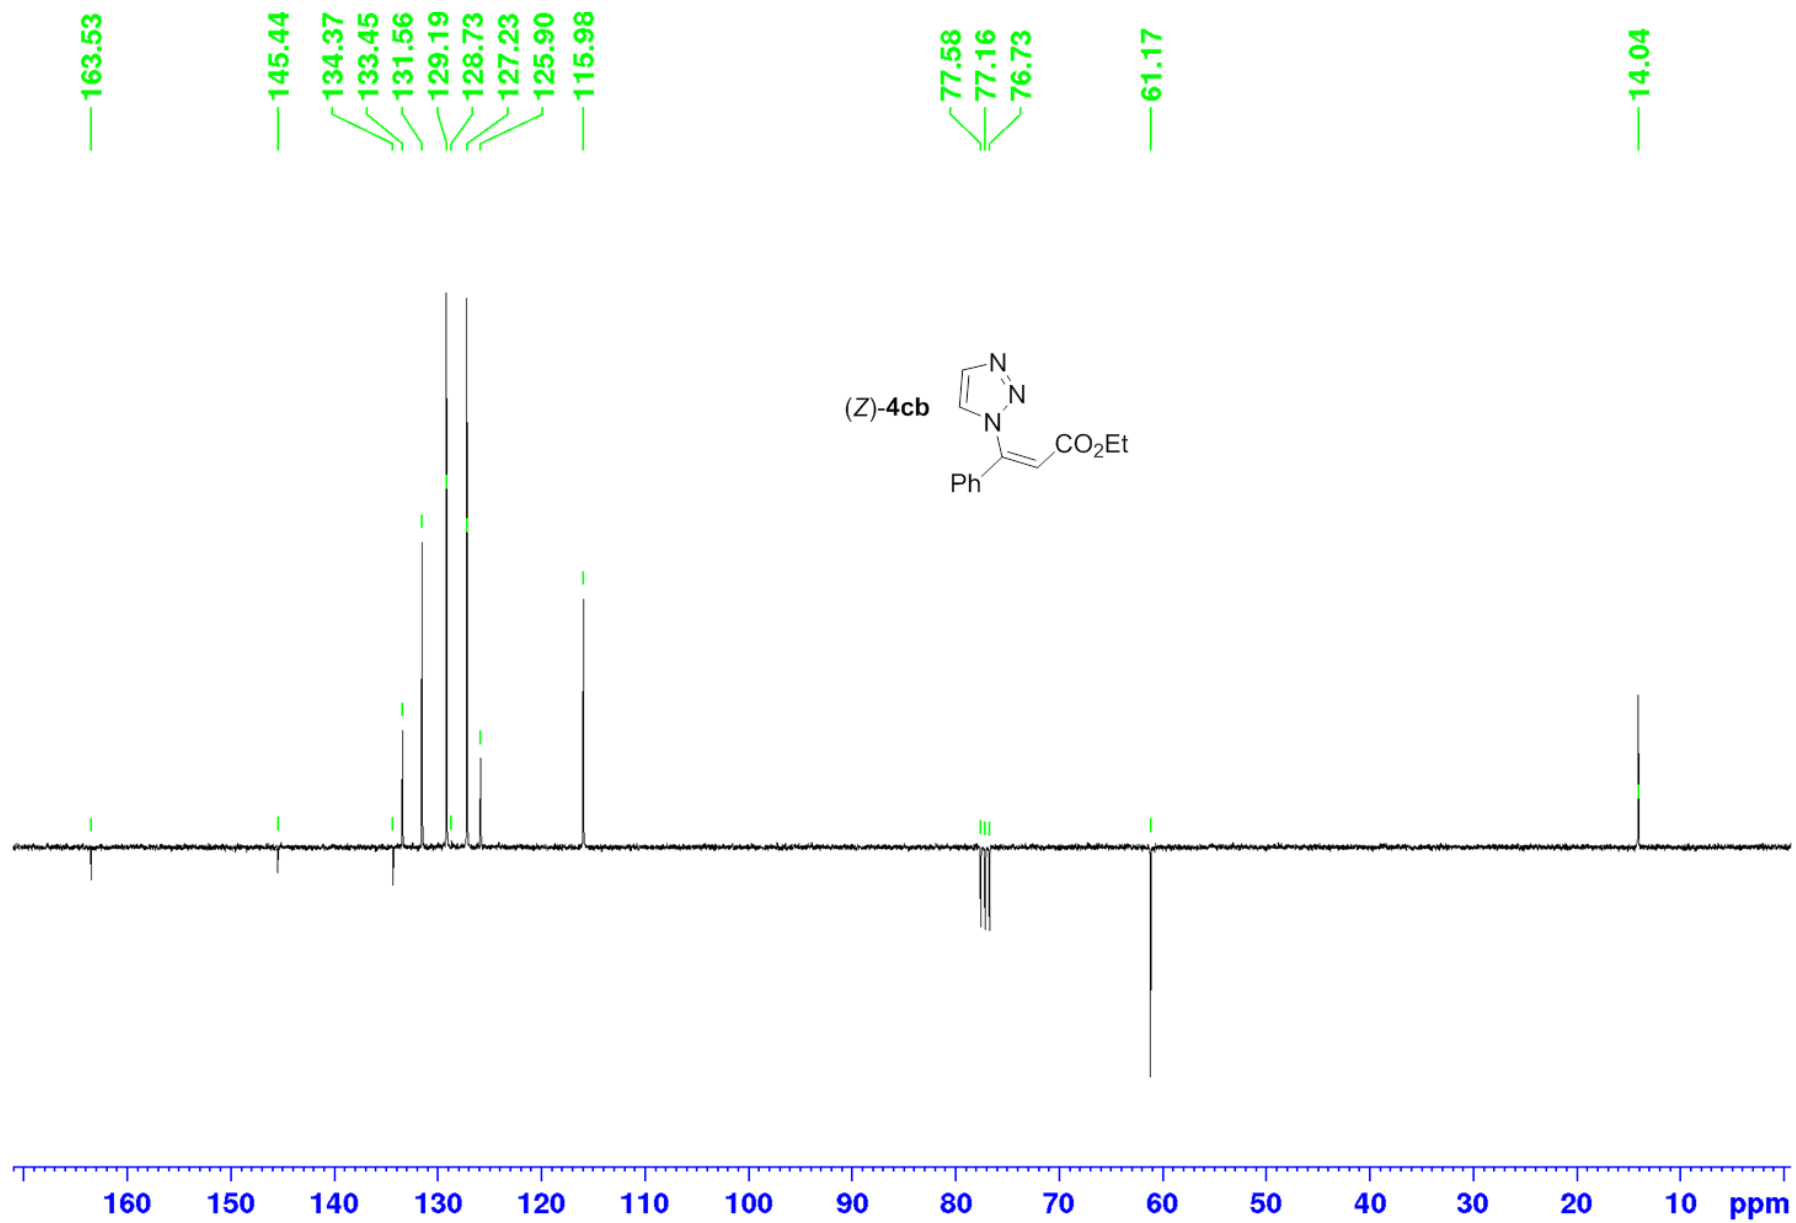

7.408  
7.404  
7.389  
7.384  
7.361  
7.355  
7.285  
7.280  
7.275  
7.265  
7.259  
7.252  
6.445  
6.439  
6.437  
6.431  
6.173

4.186  
4.162  
4.138  
4.115

1.552  
1.235  
1.211  
1.188

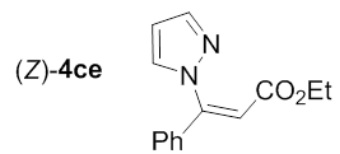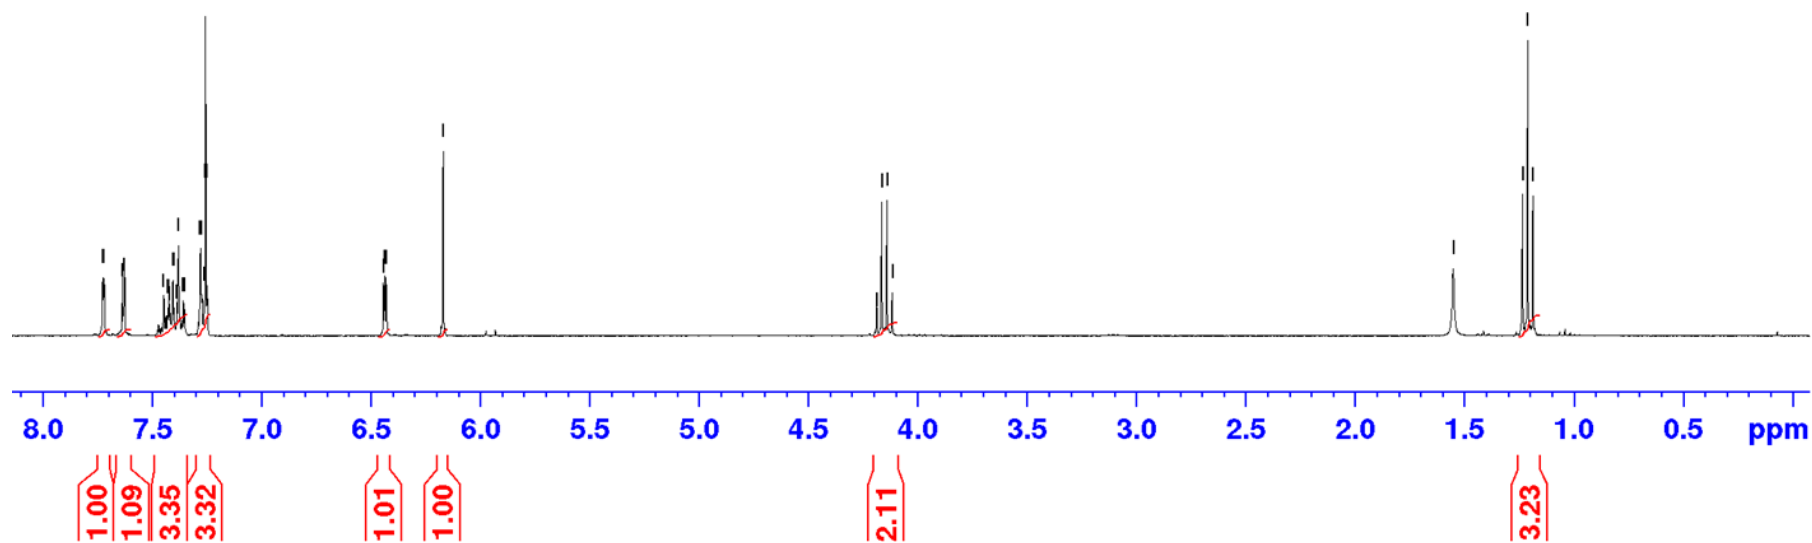

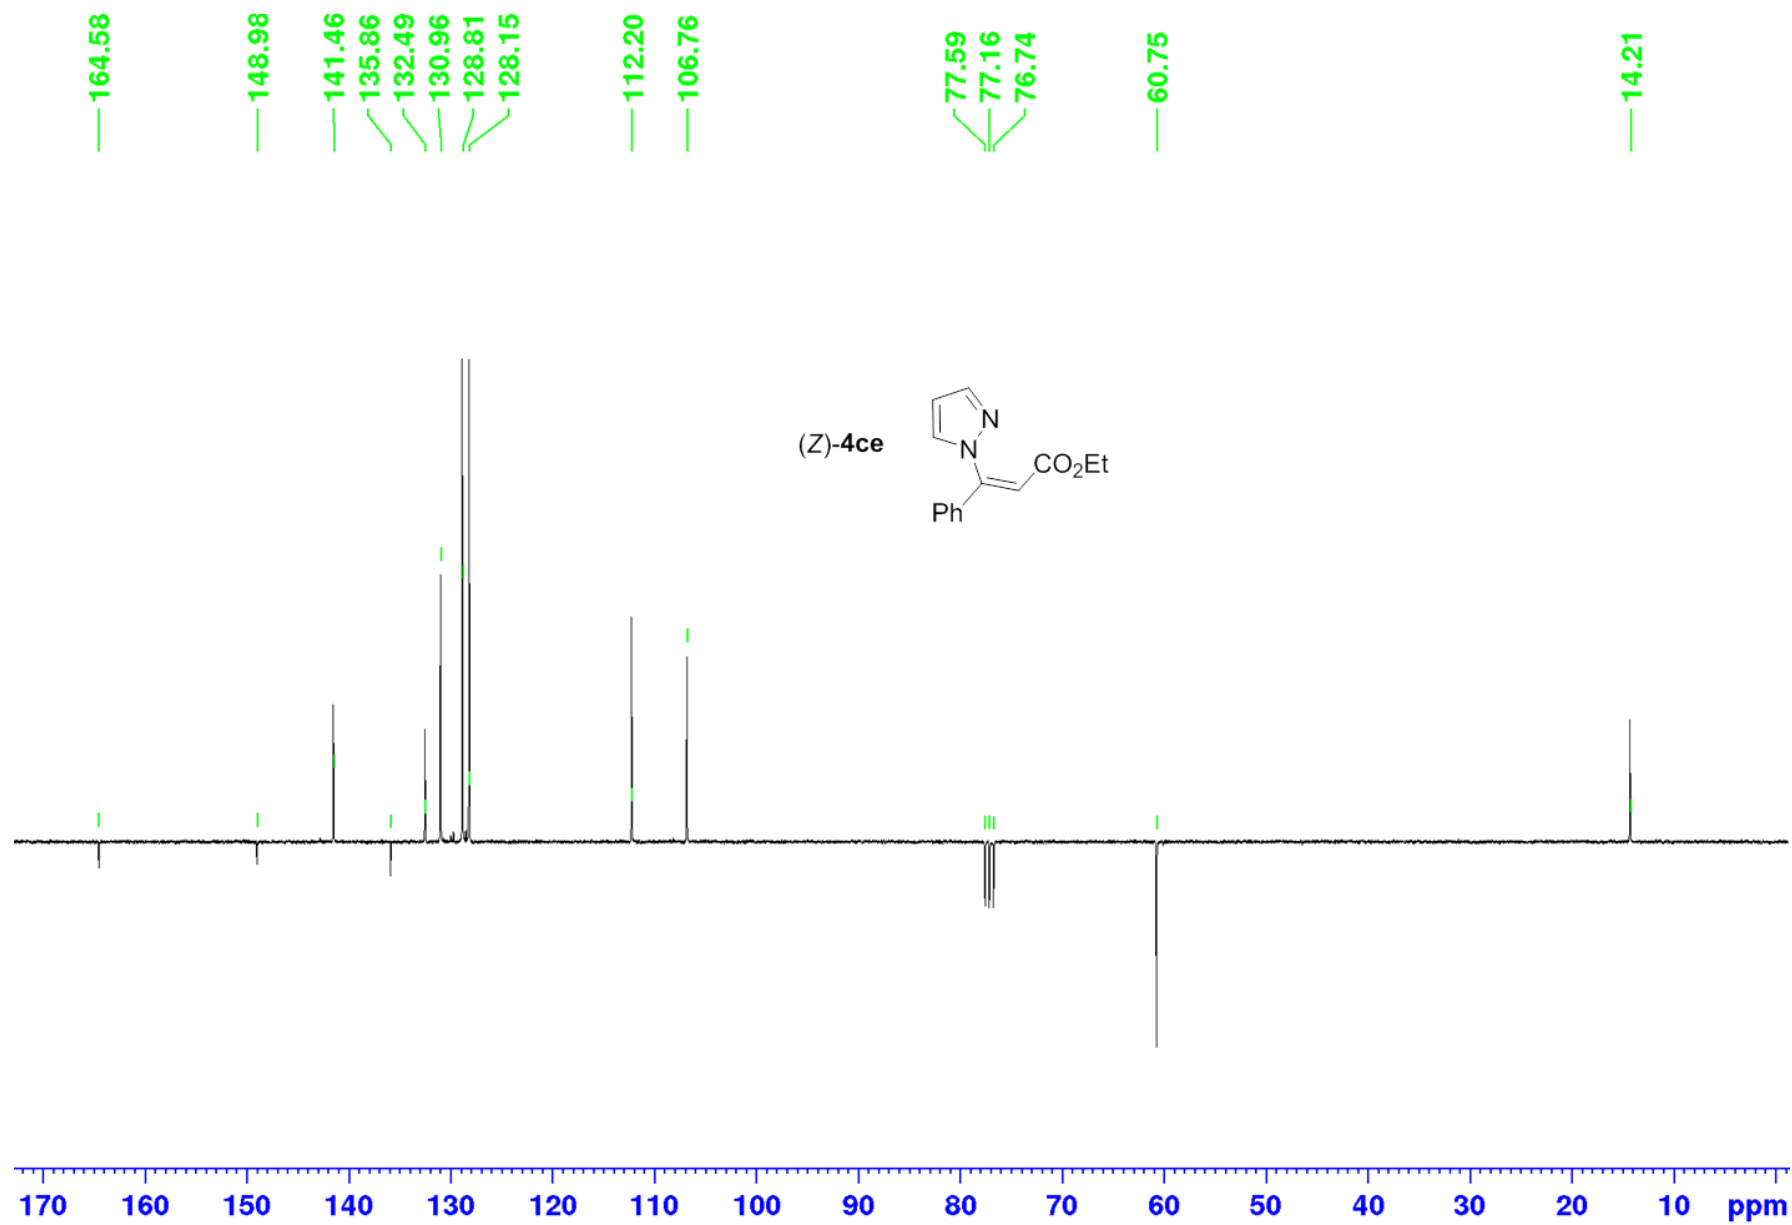

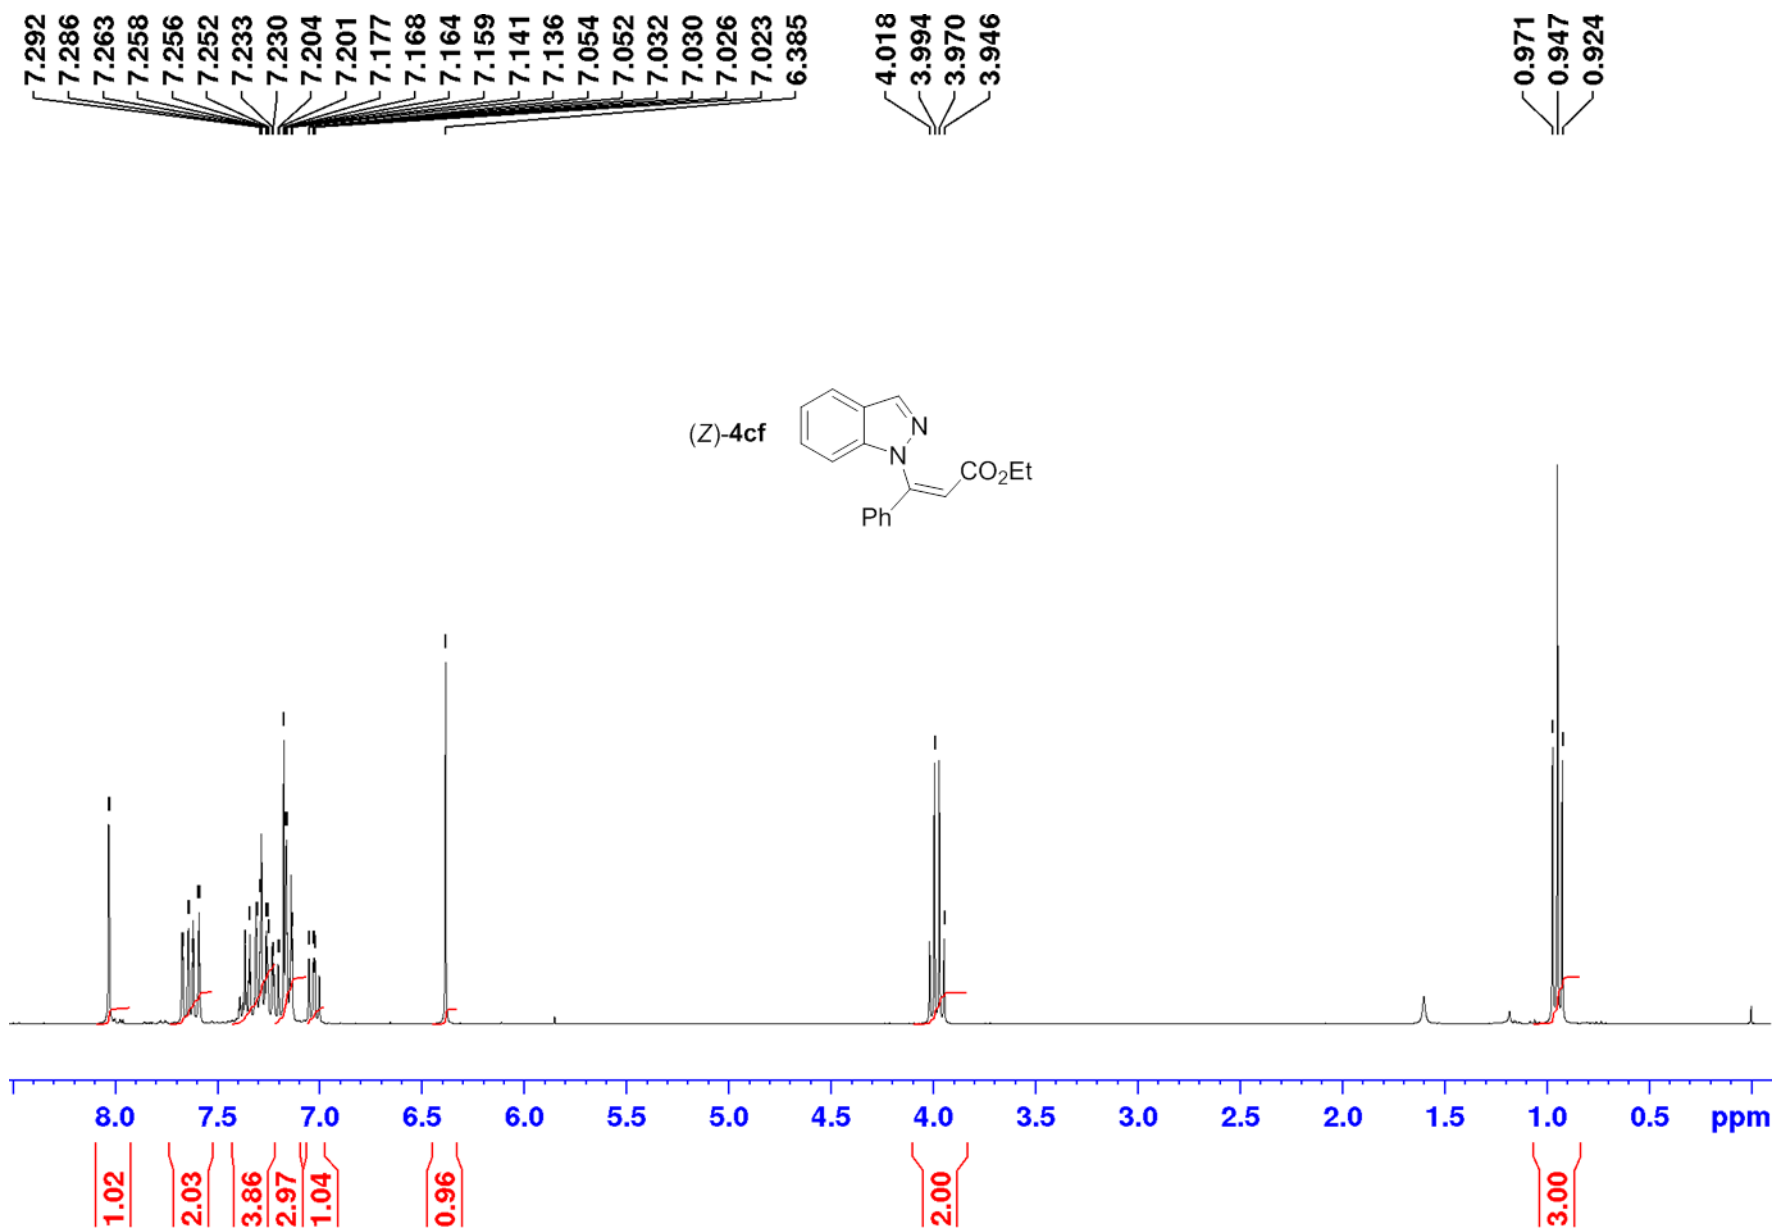



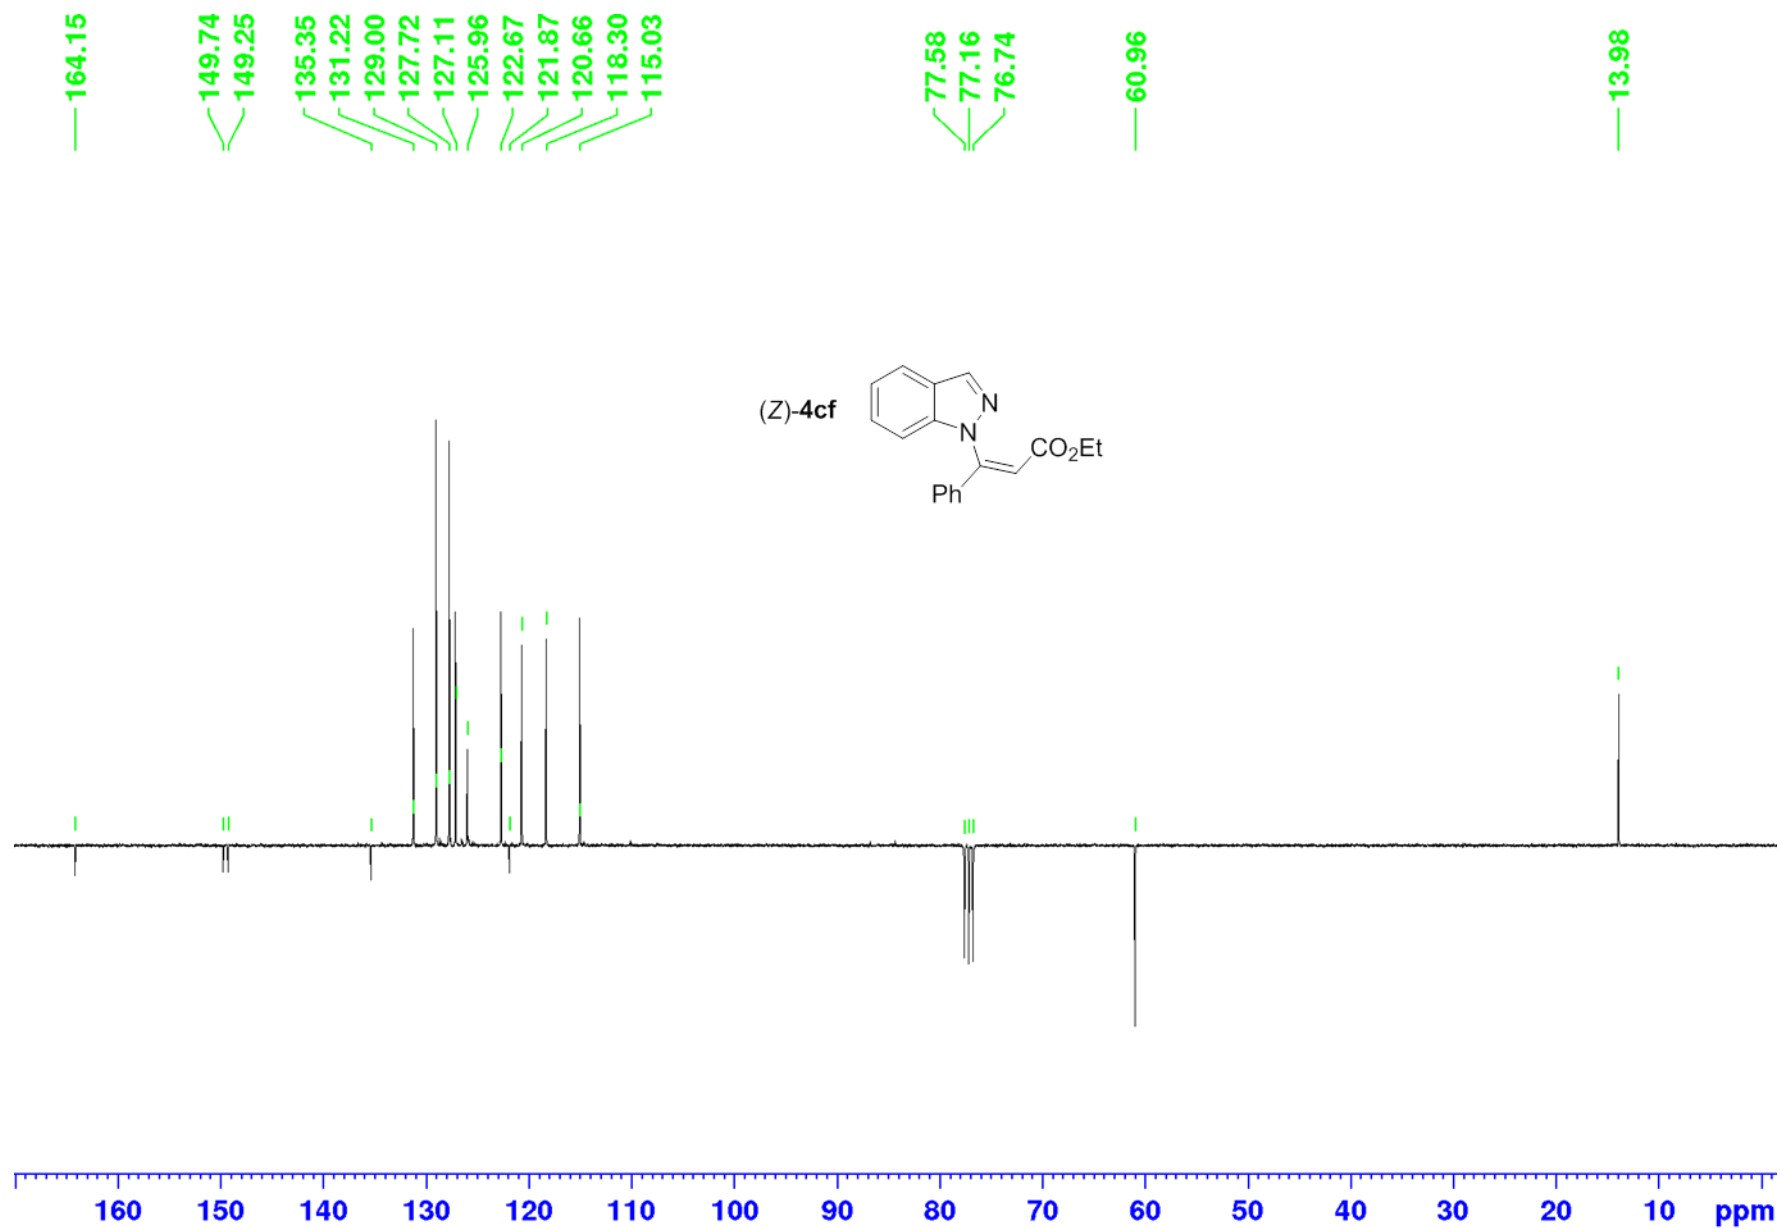

7.514  
7.483  
7.478  
7.463  
7.458  
7.434  
7.430  
7.389  
7.385  
7.381  
7.380  
7.368  
7.361  
7.356  
7.260  
6.507  
6.502  
6.499  
6.493  
5.348

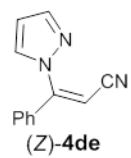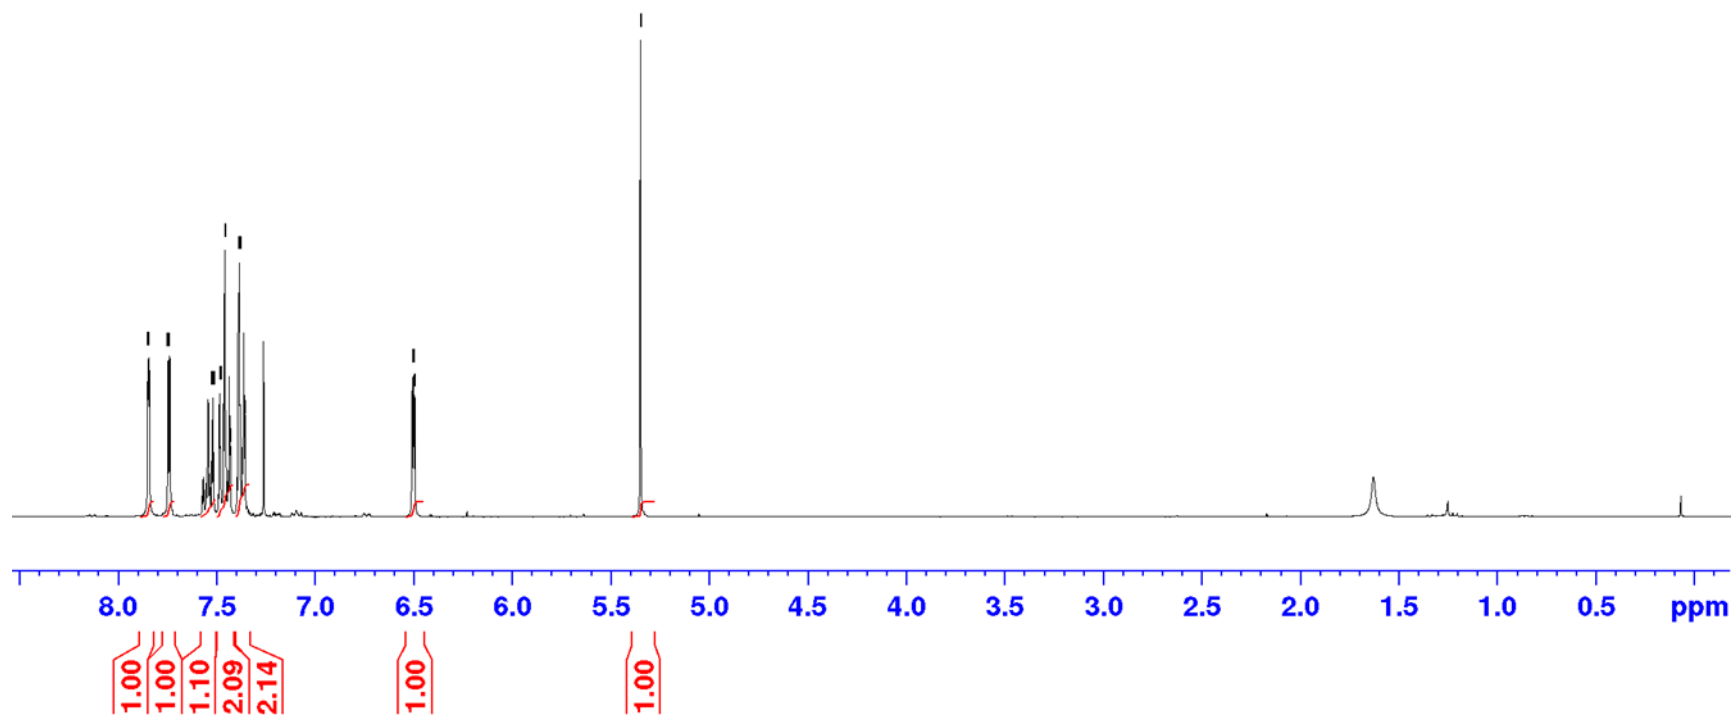

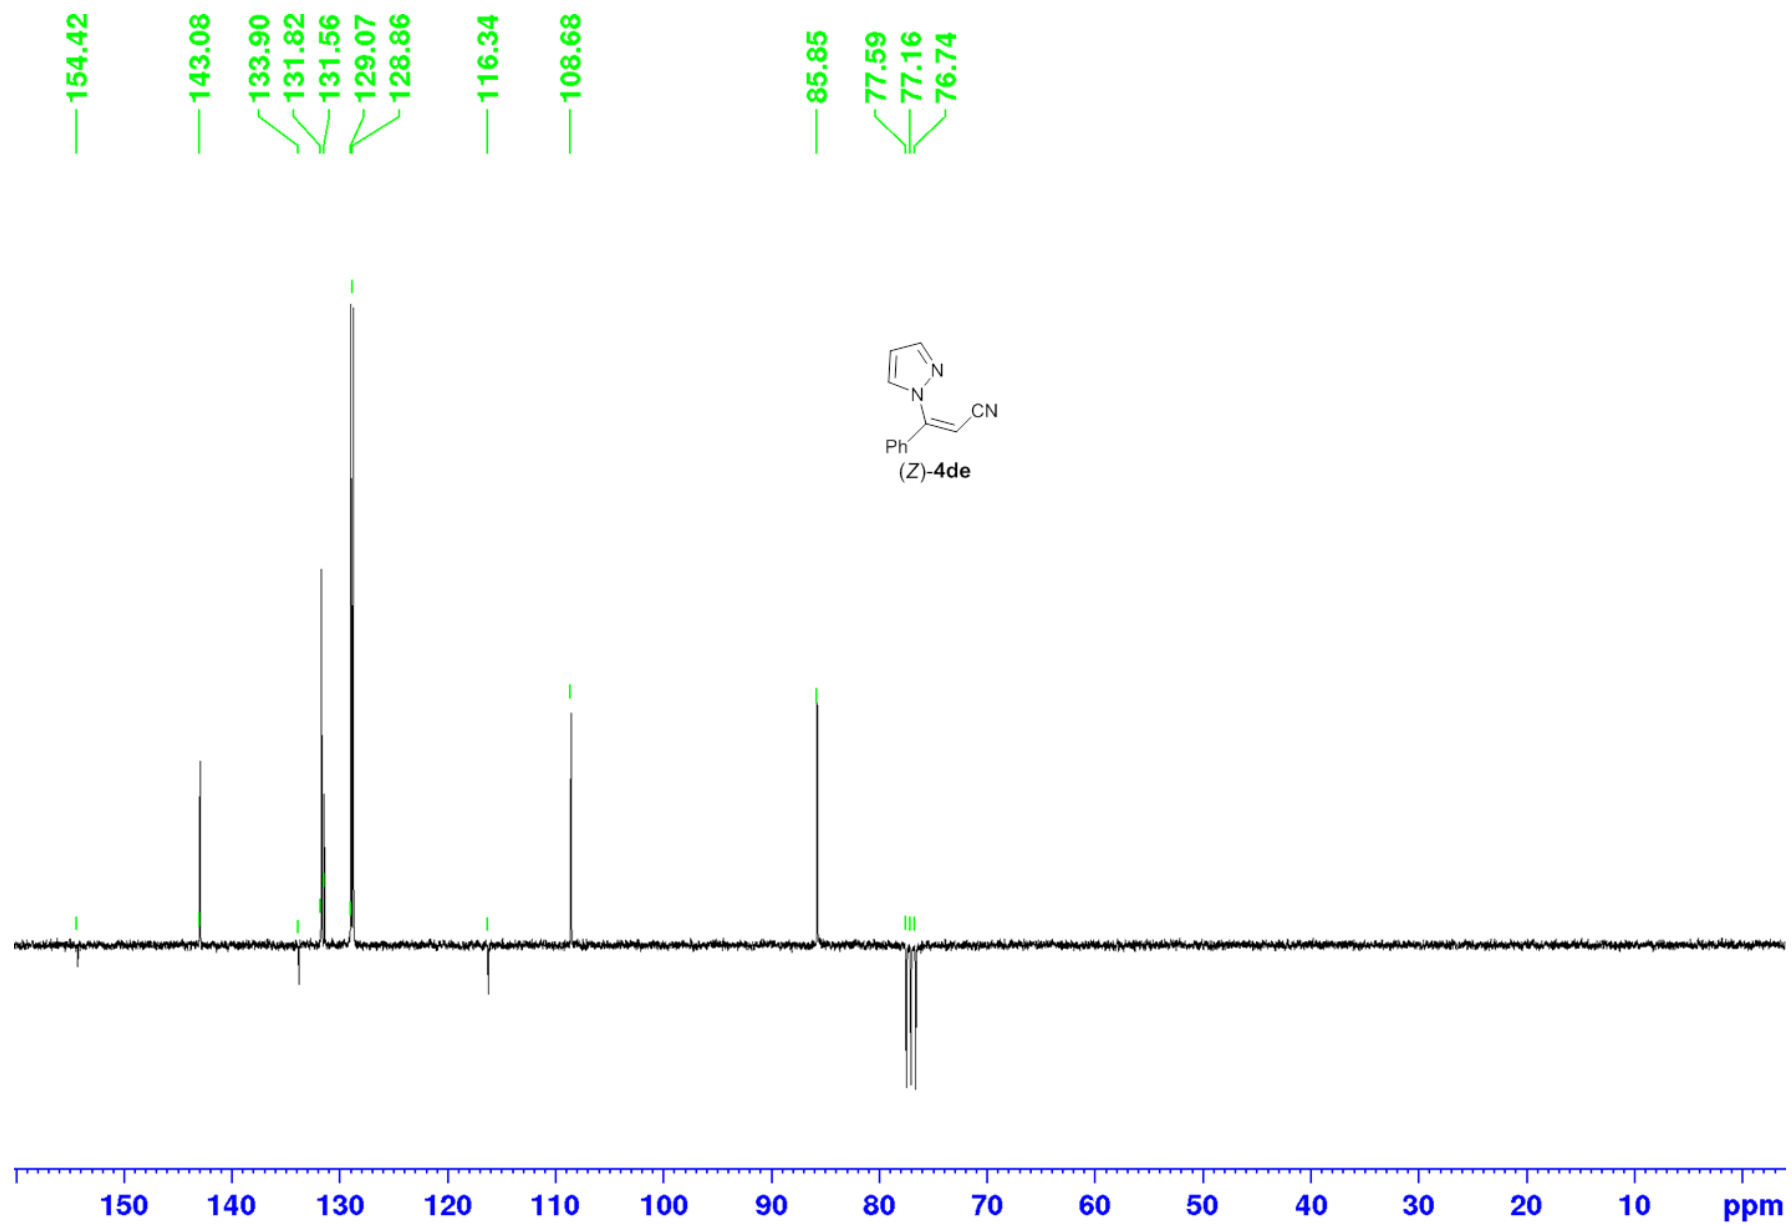

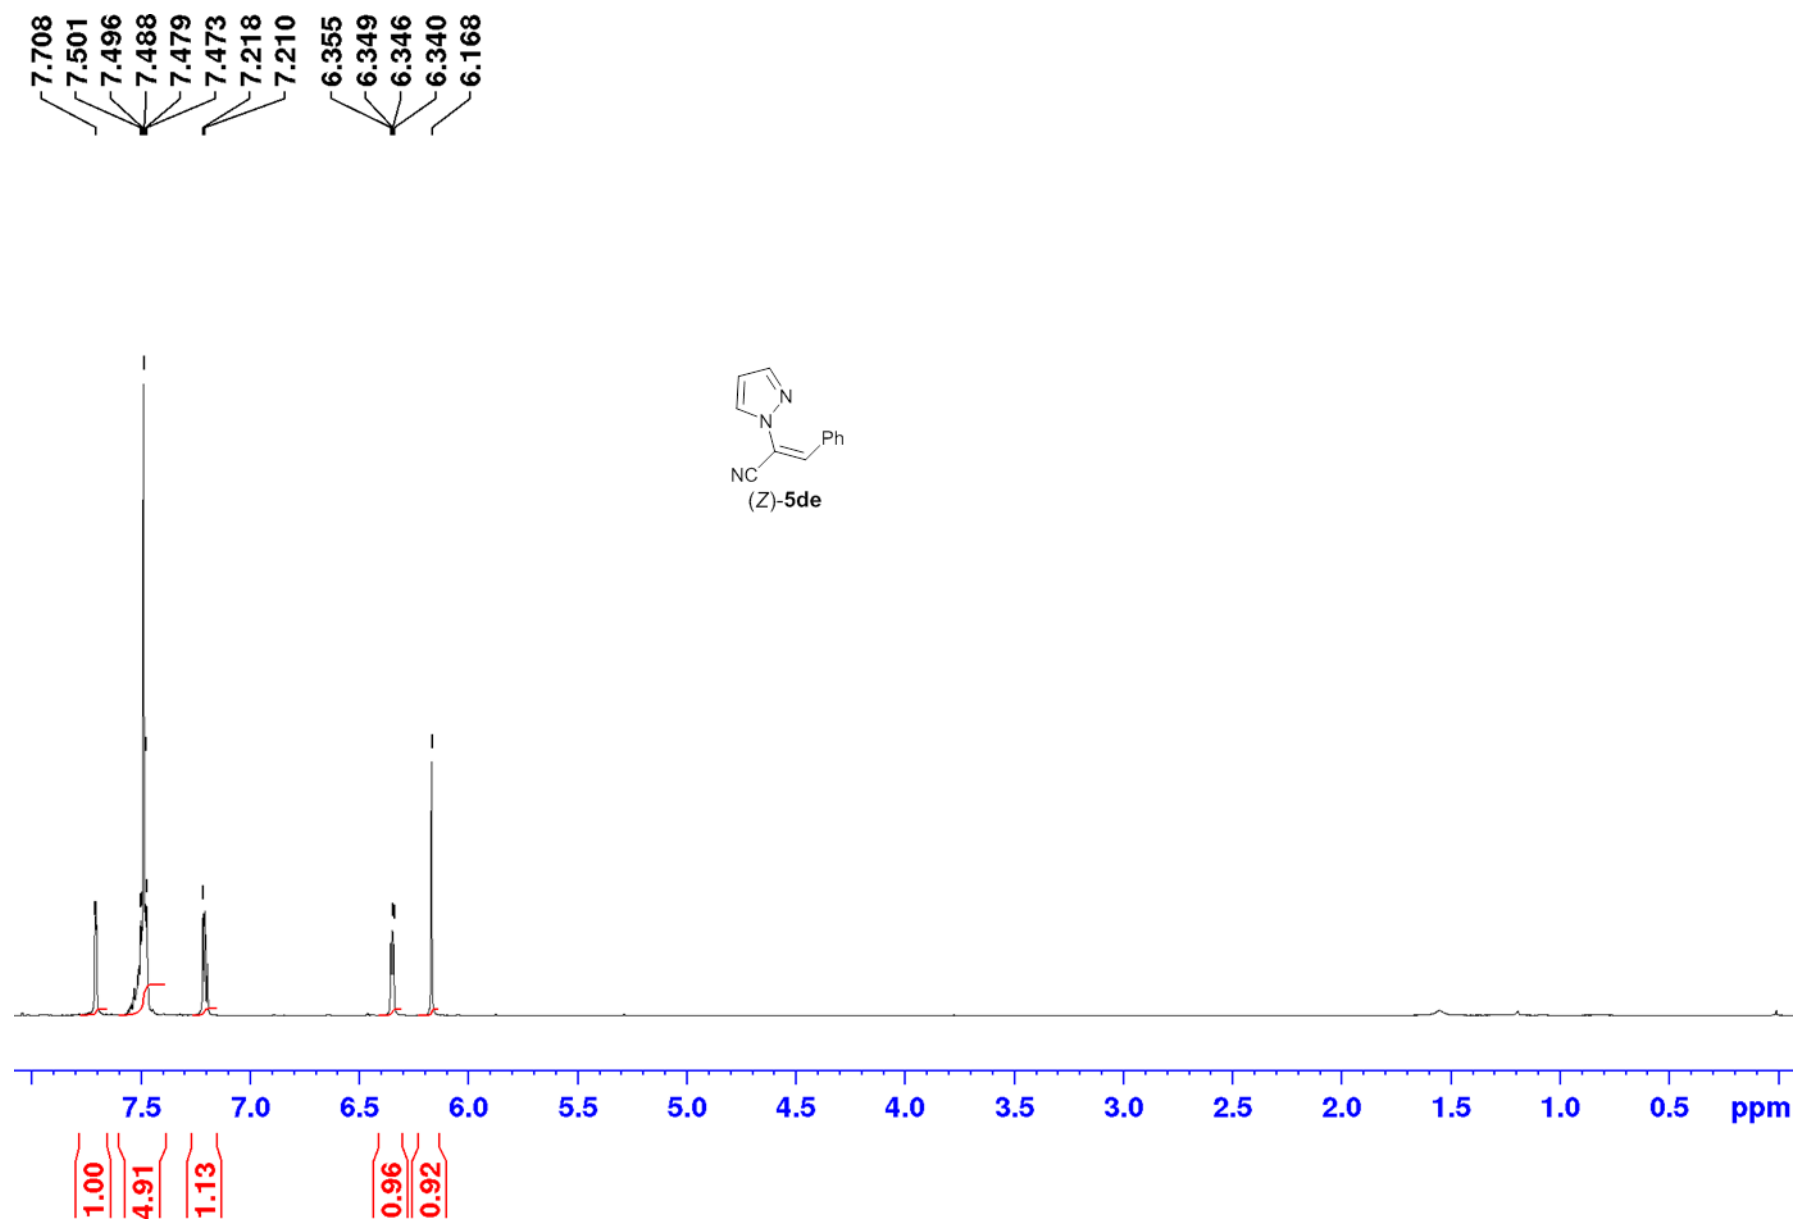

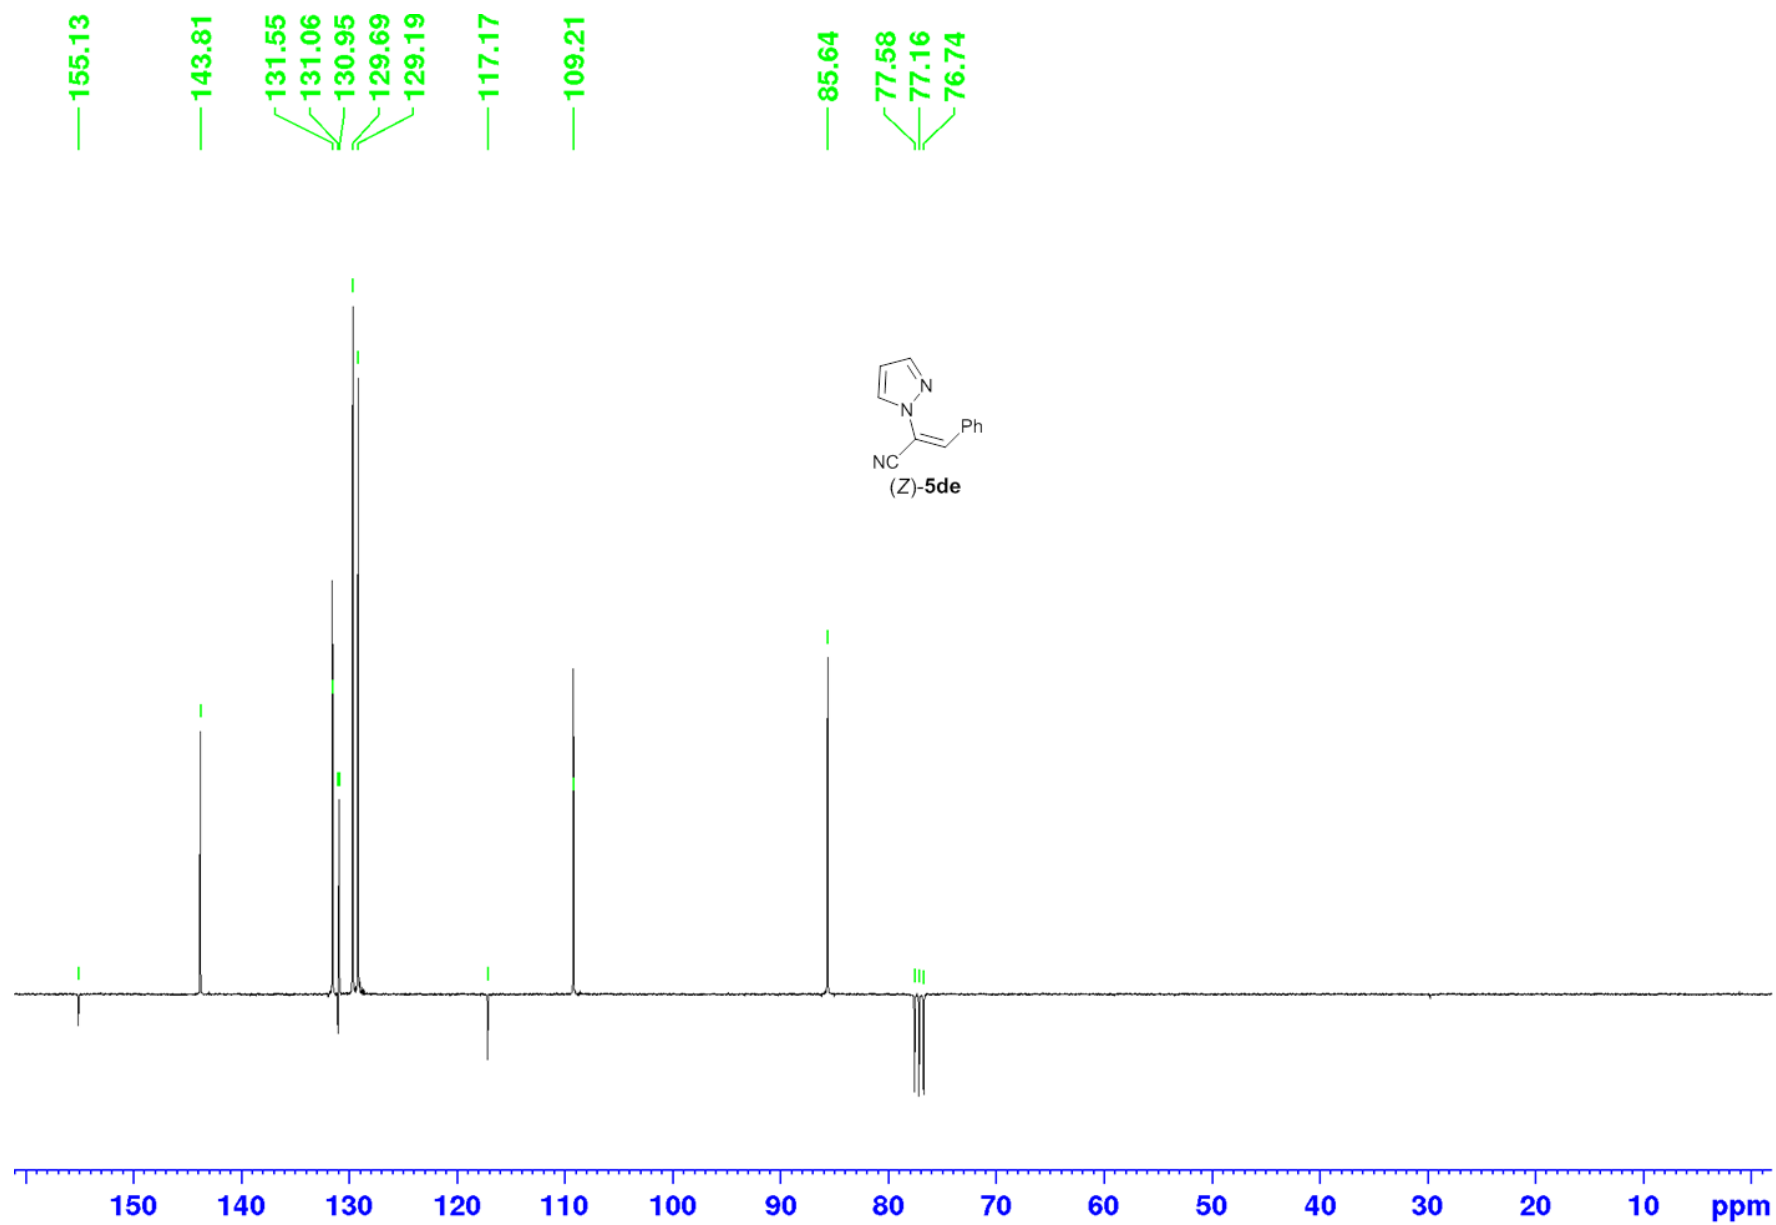

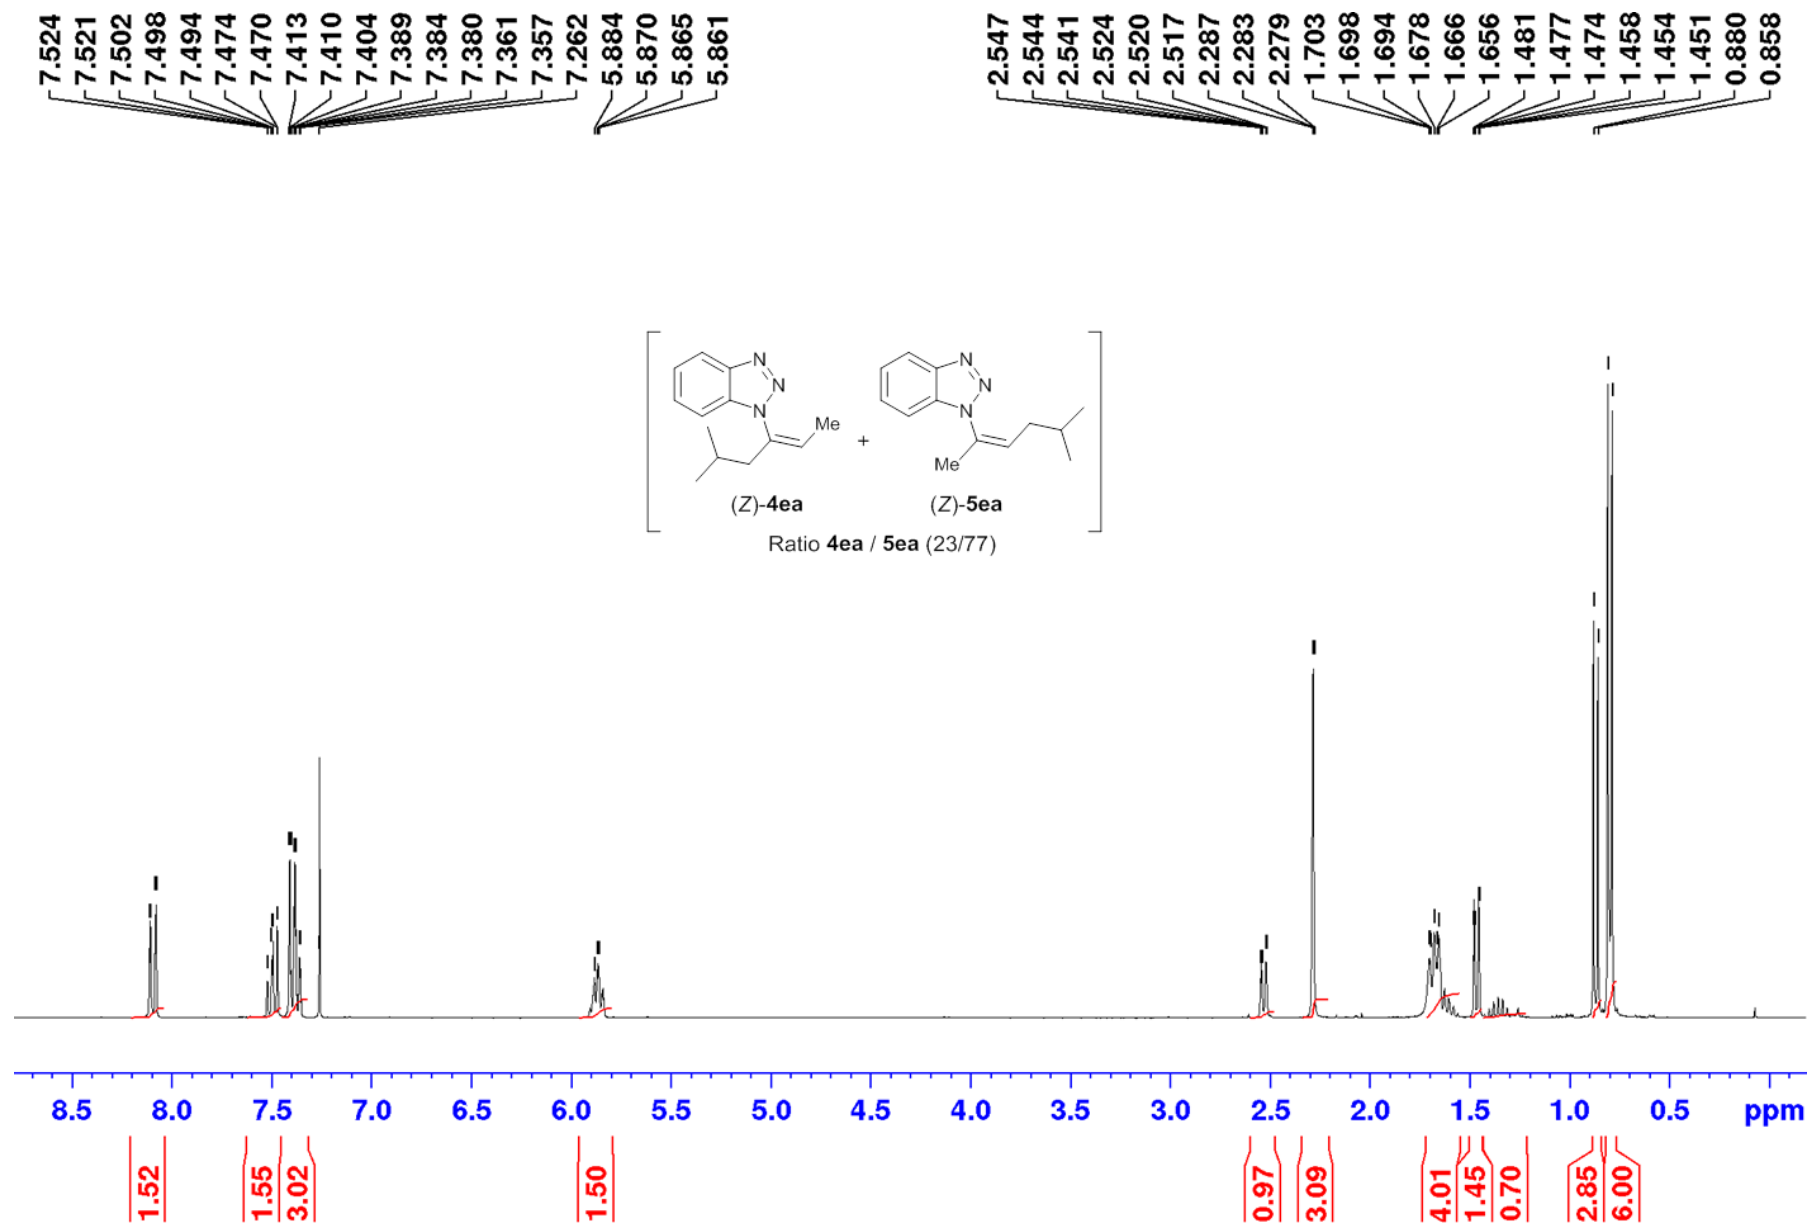

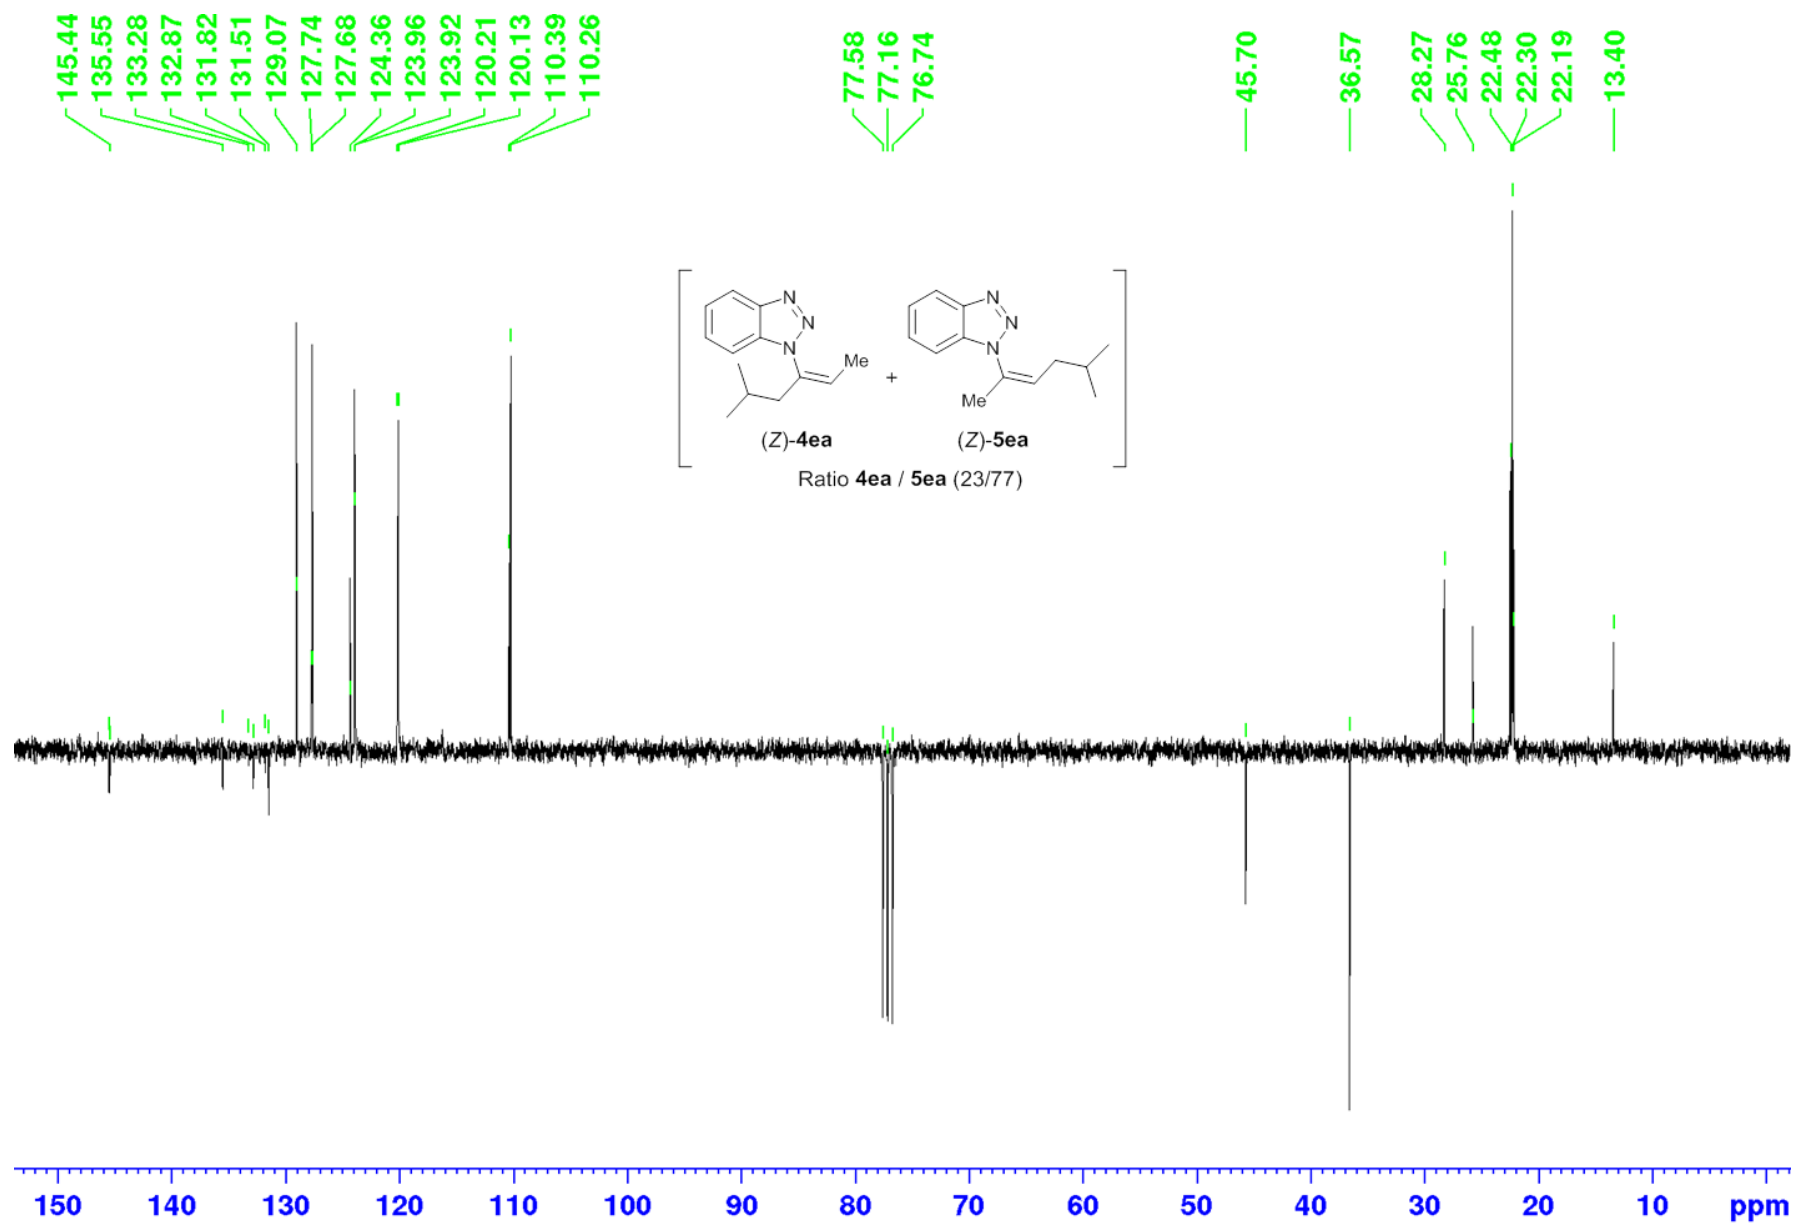

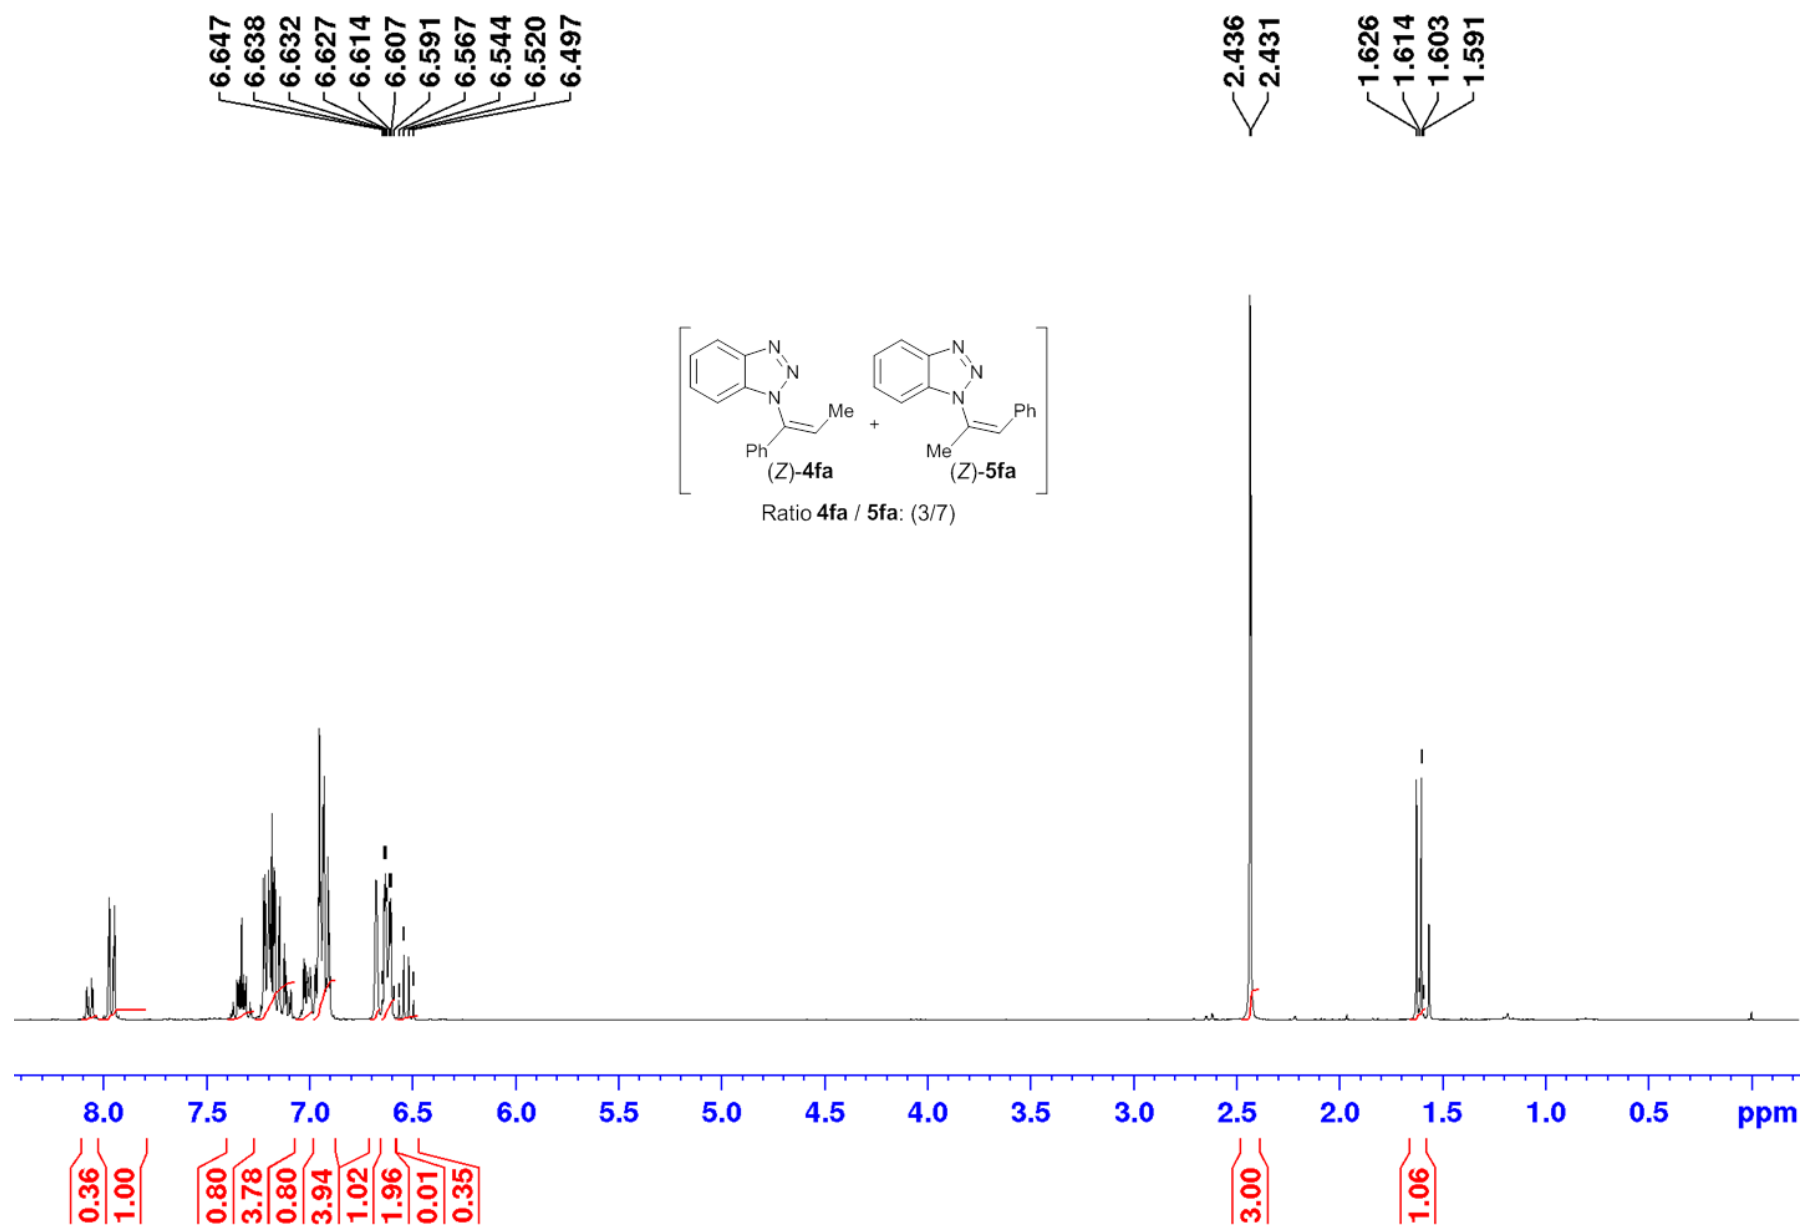



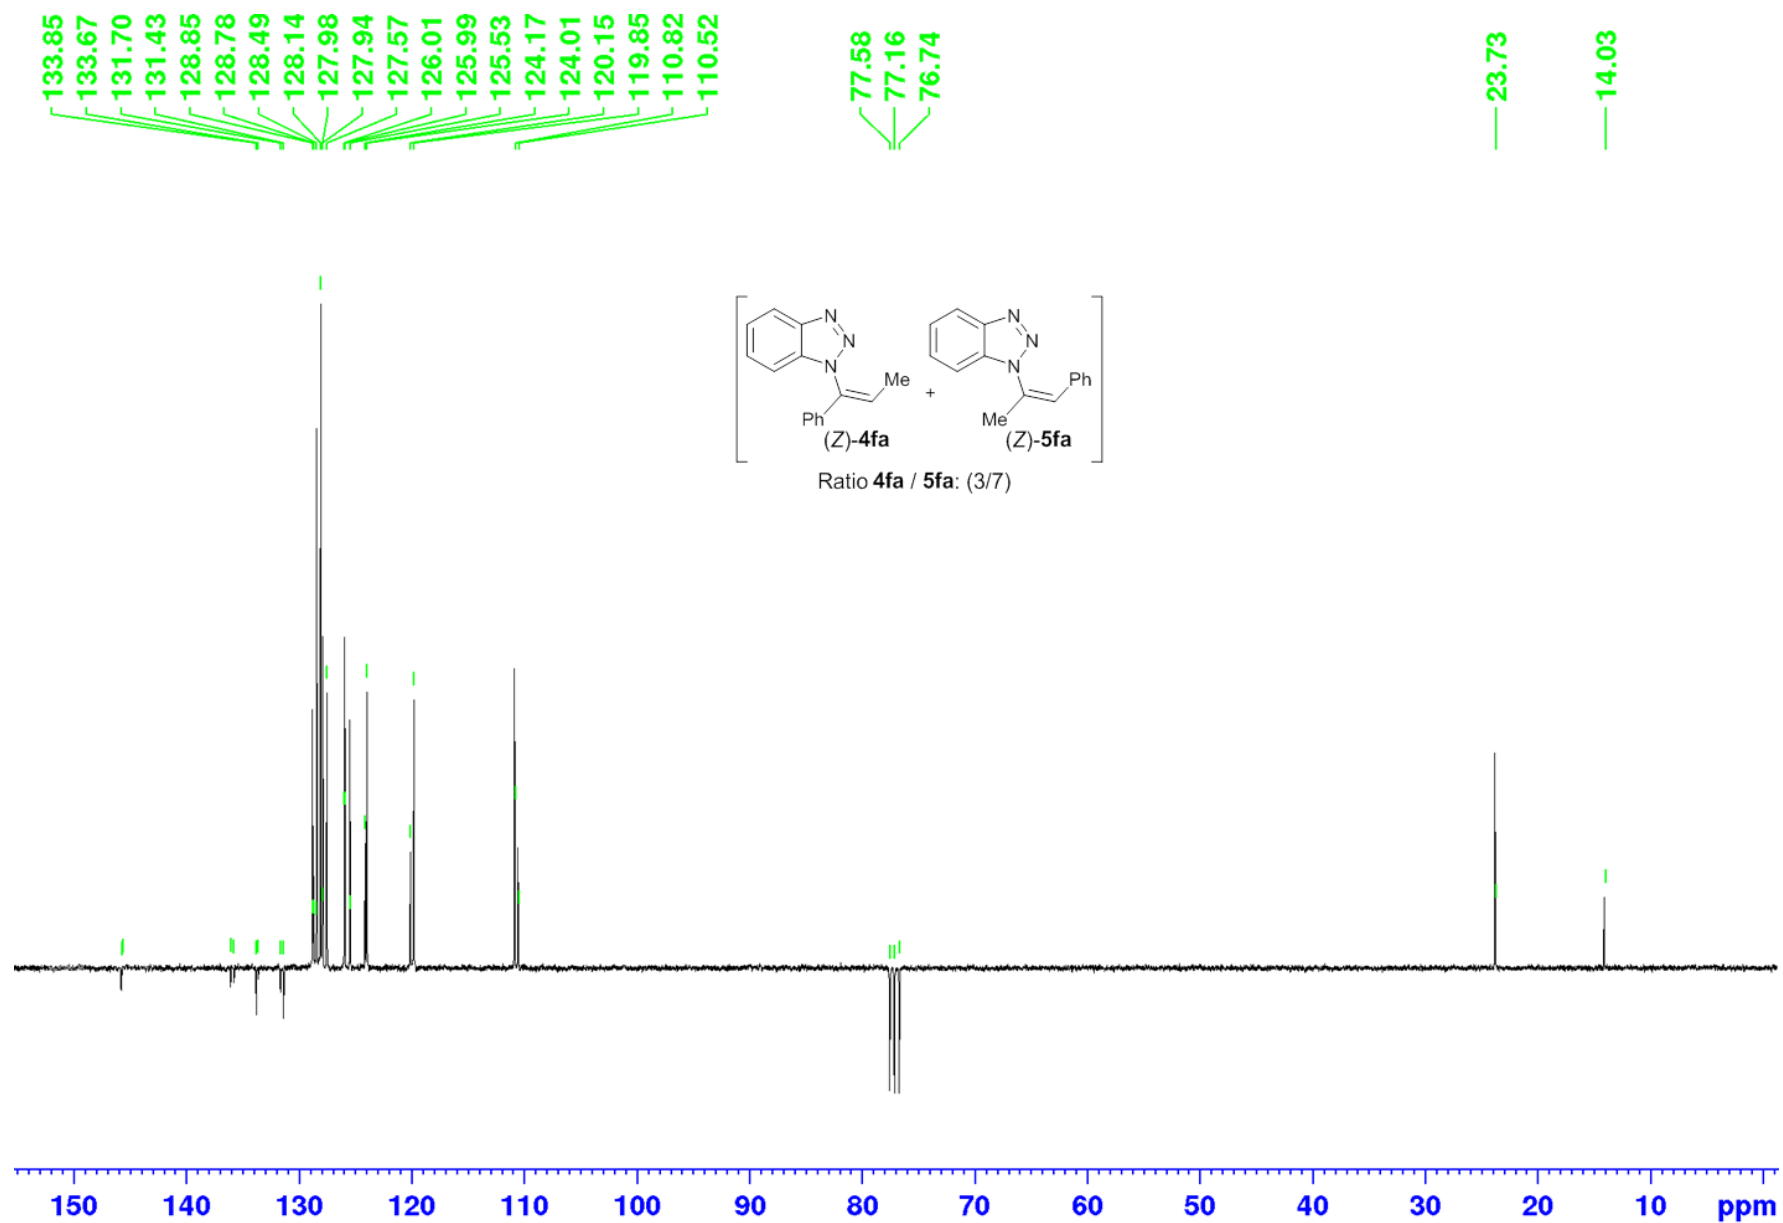

7.260  
7.216  
7.203  
7.193  
7.182  
7.100  
7.089  
7.082  
7.076  
7.068  
6.821  
6.813  
6.801  
6.789  
6.530  
6.432  
6.409

2.447  
2.444

1.742  
1.718  
1.703

0.077  
0.065

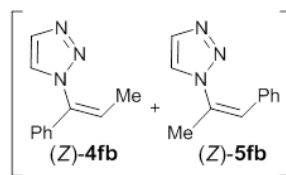

Ratio 4fb / 5fb: (23/77)

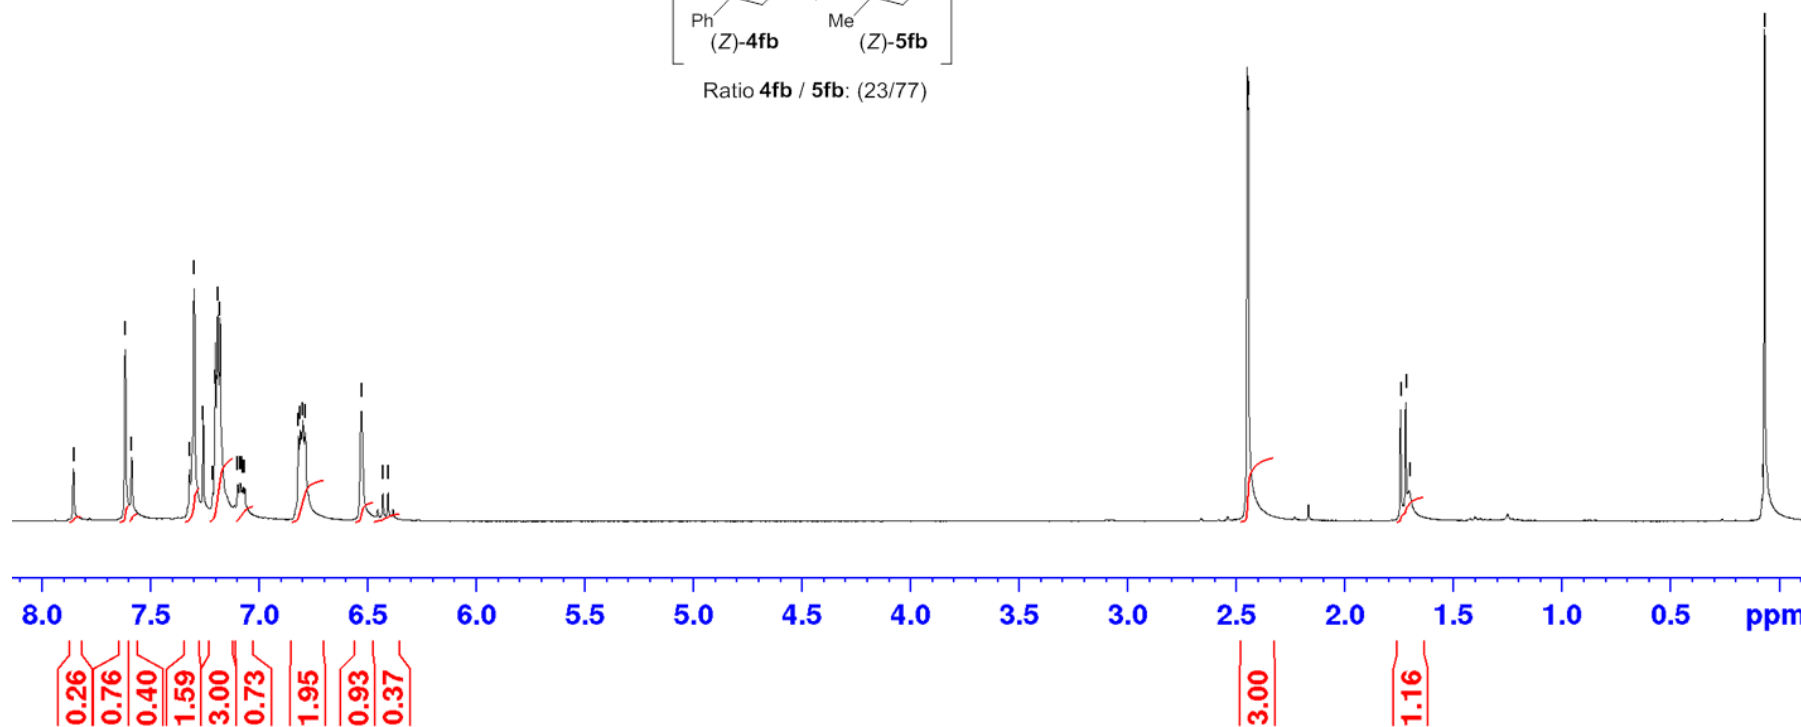

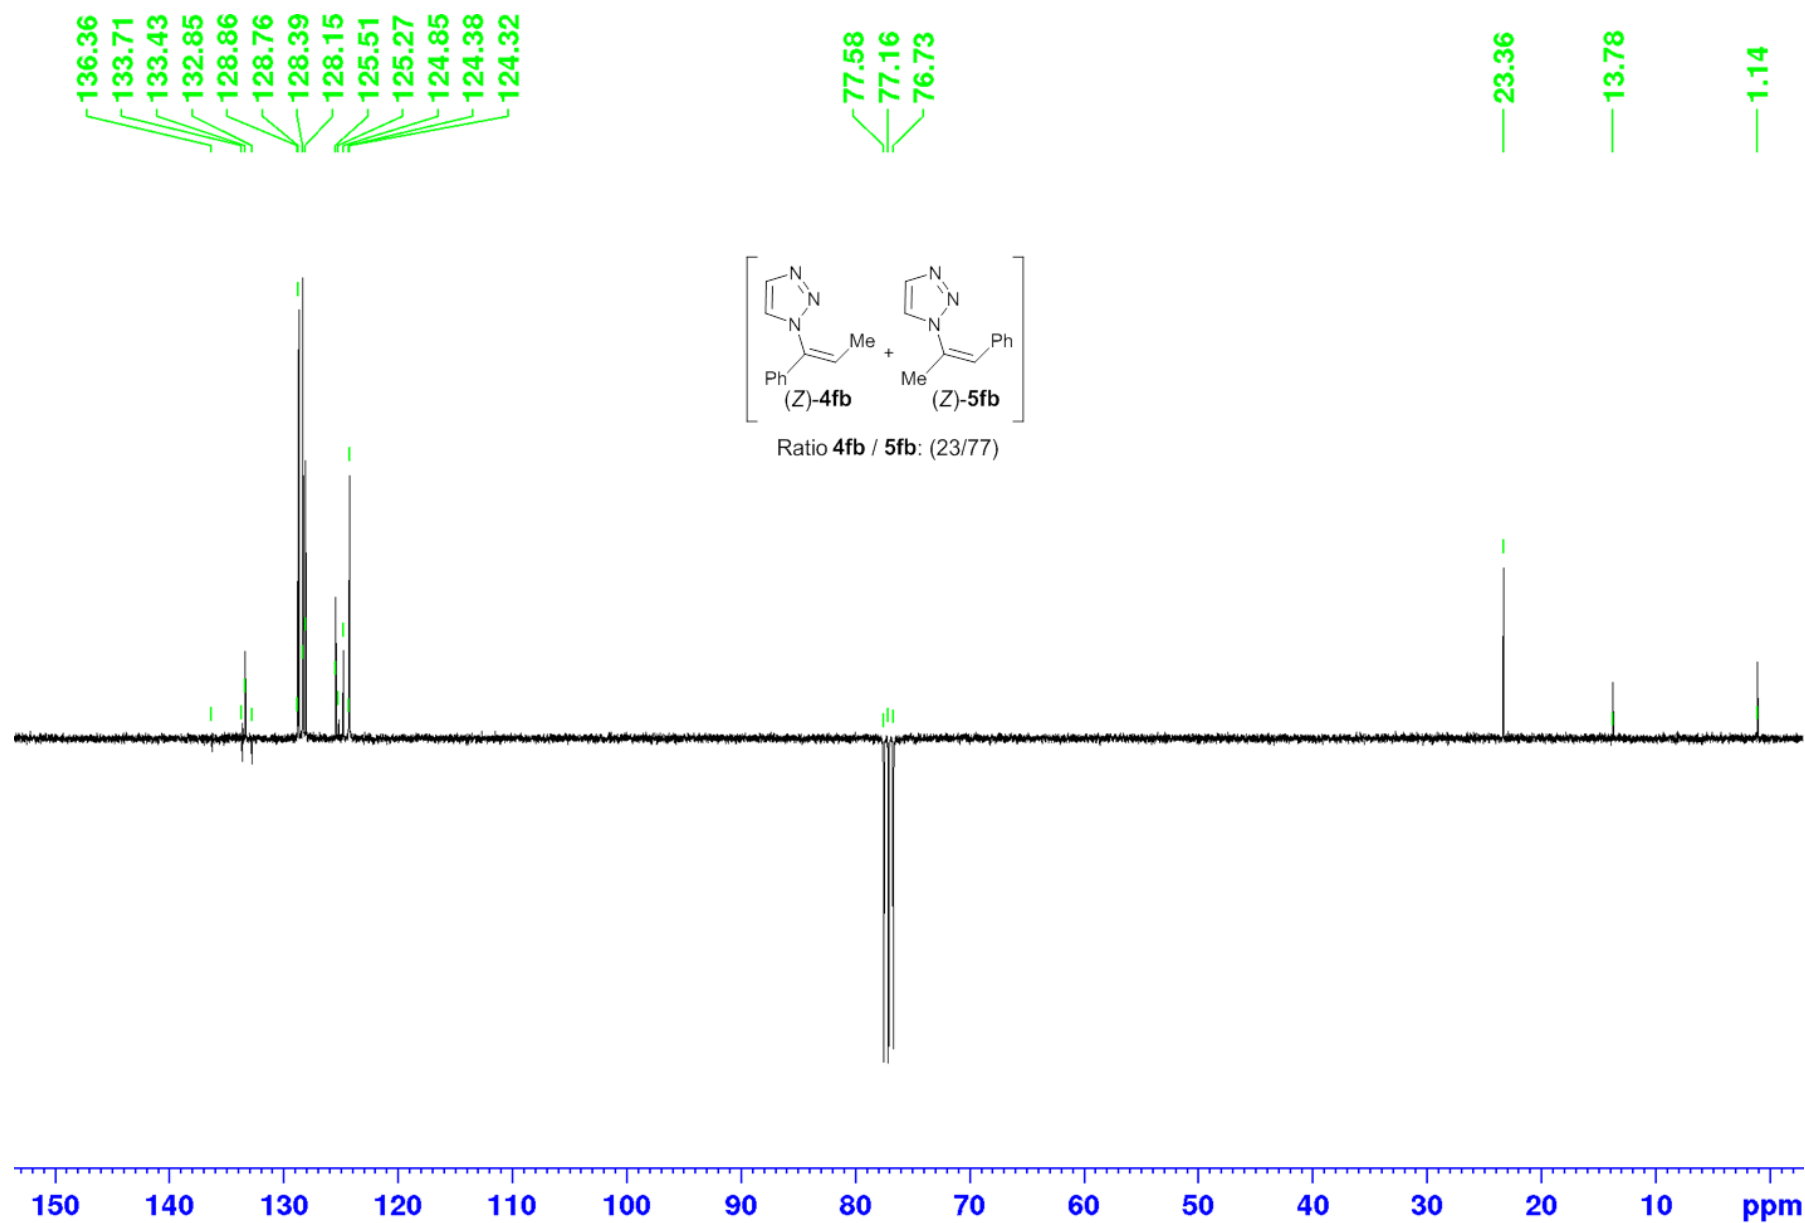

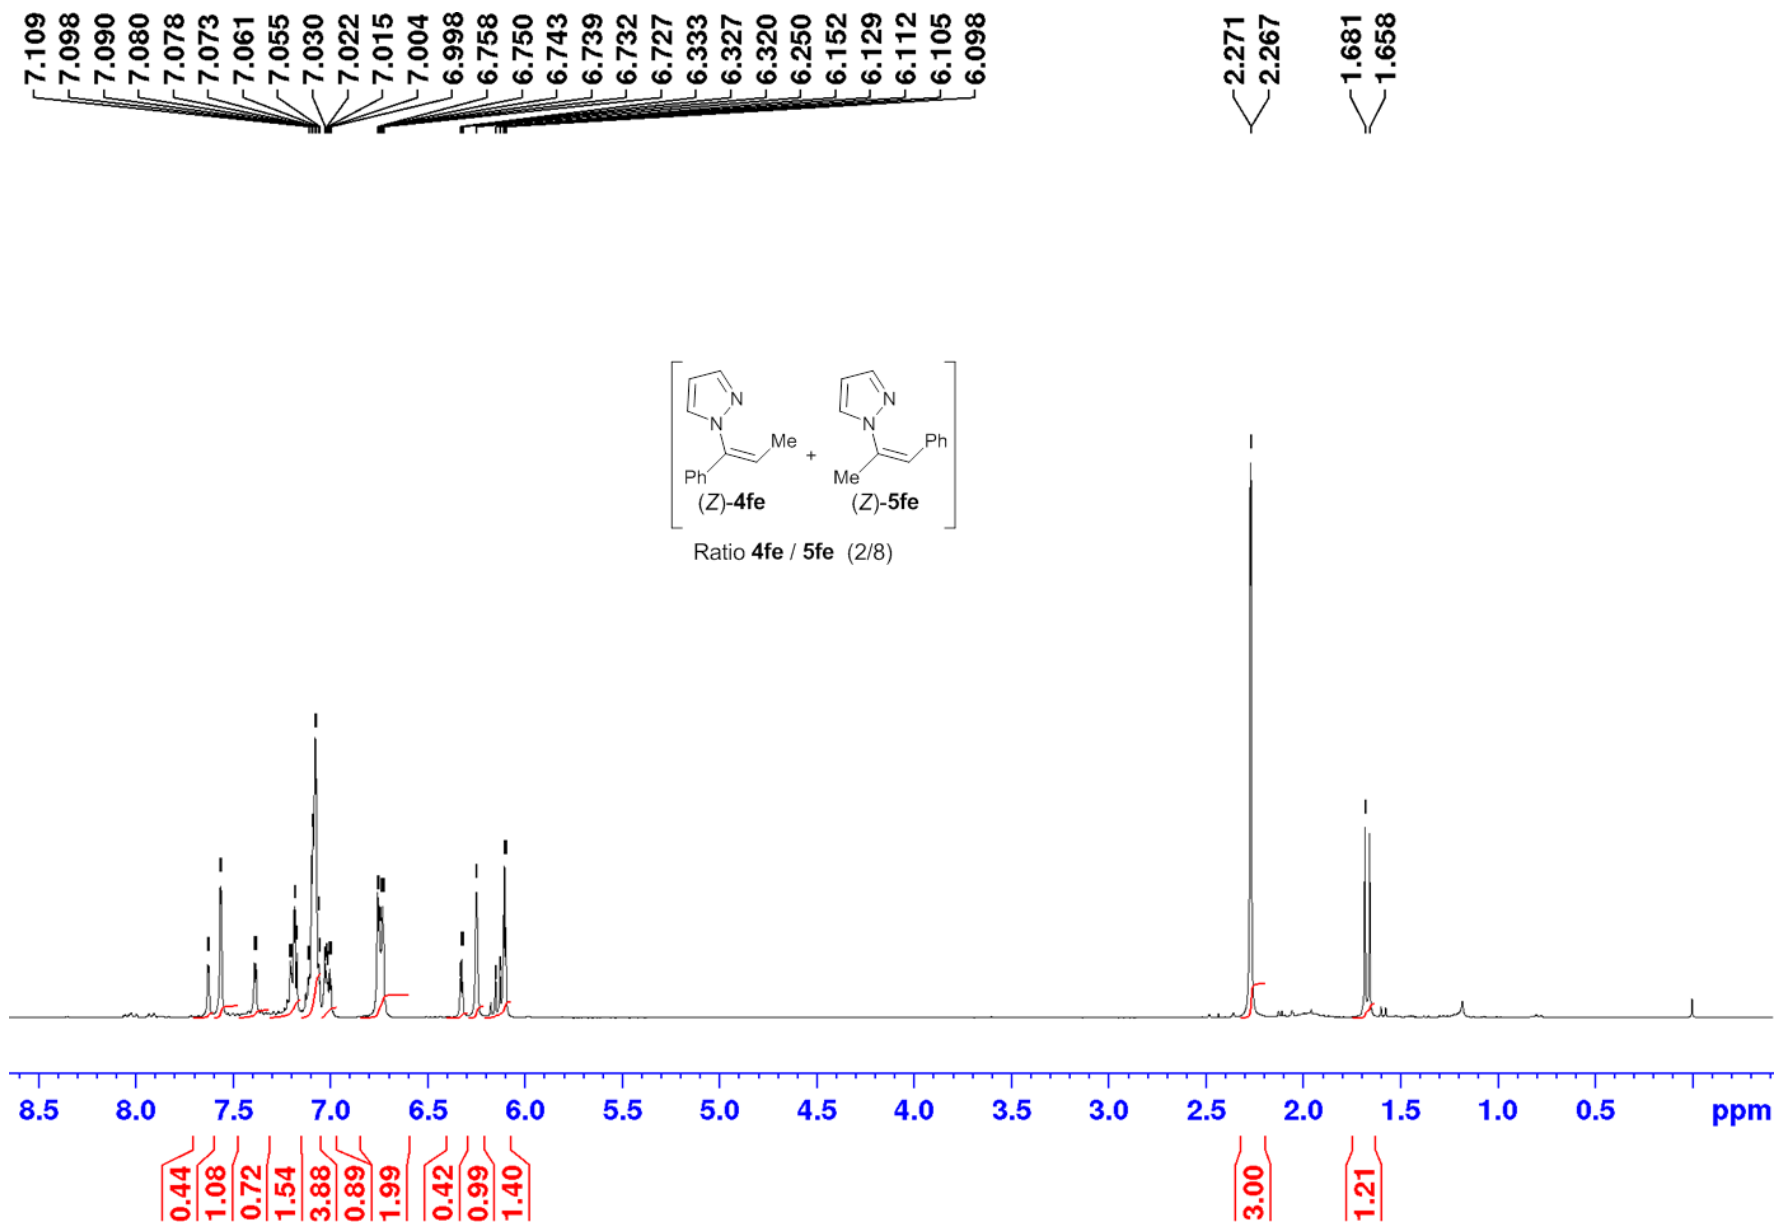

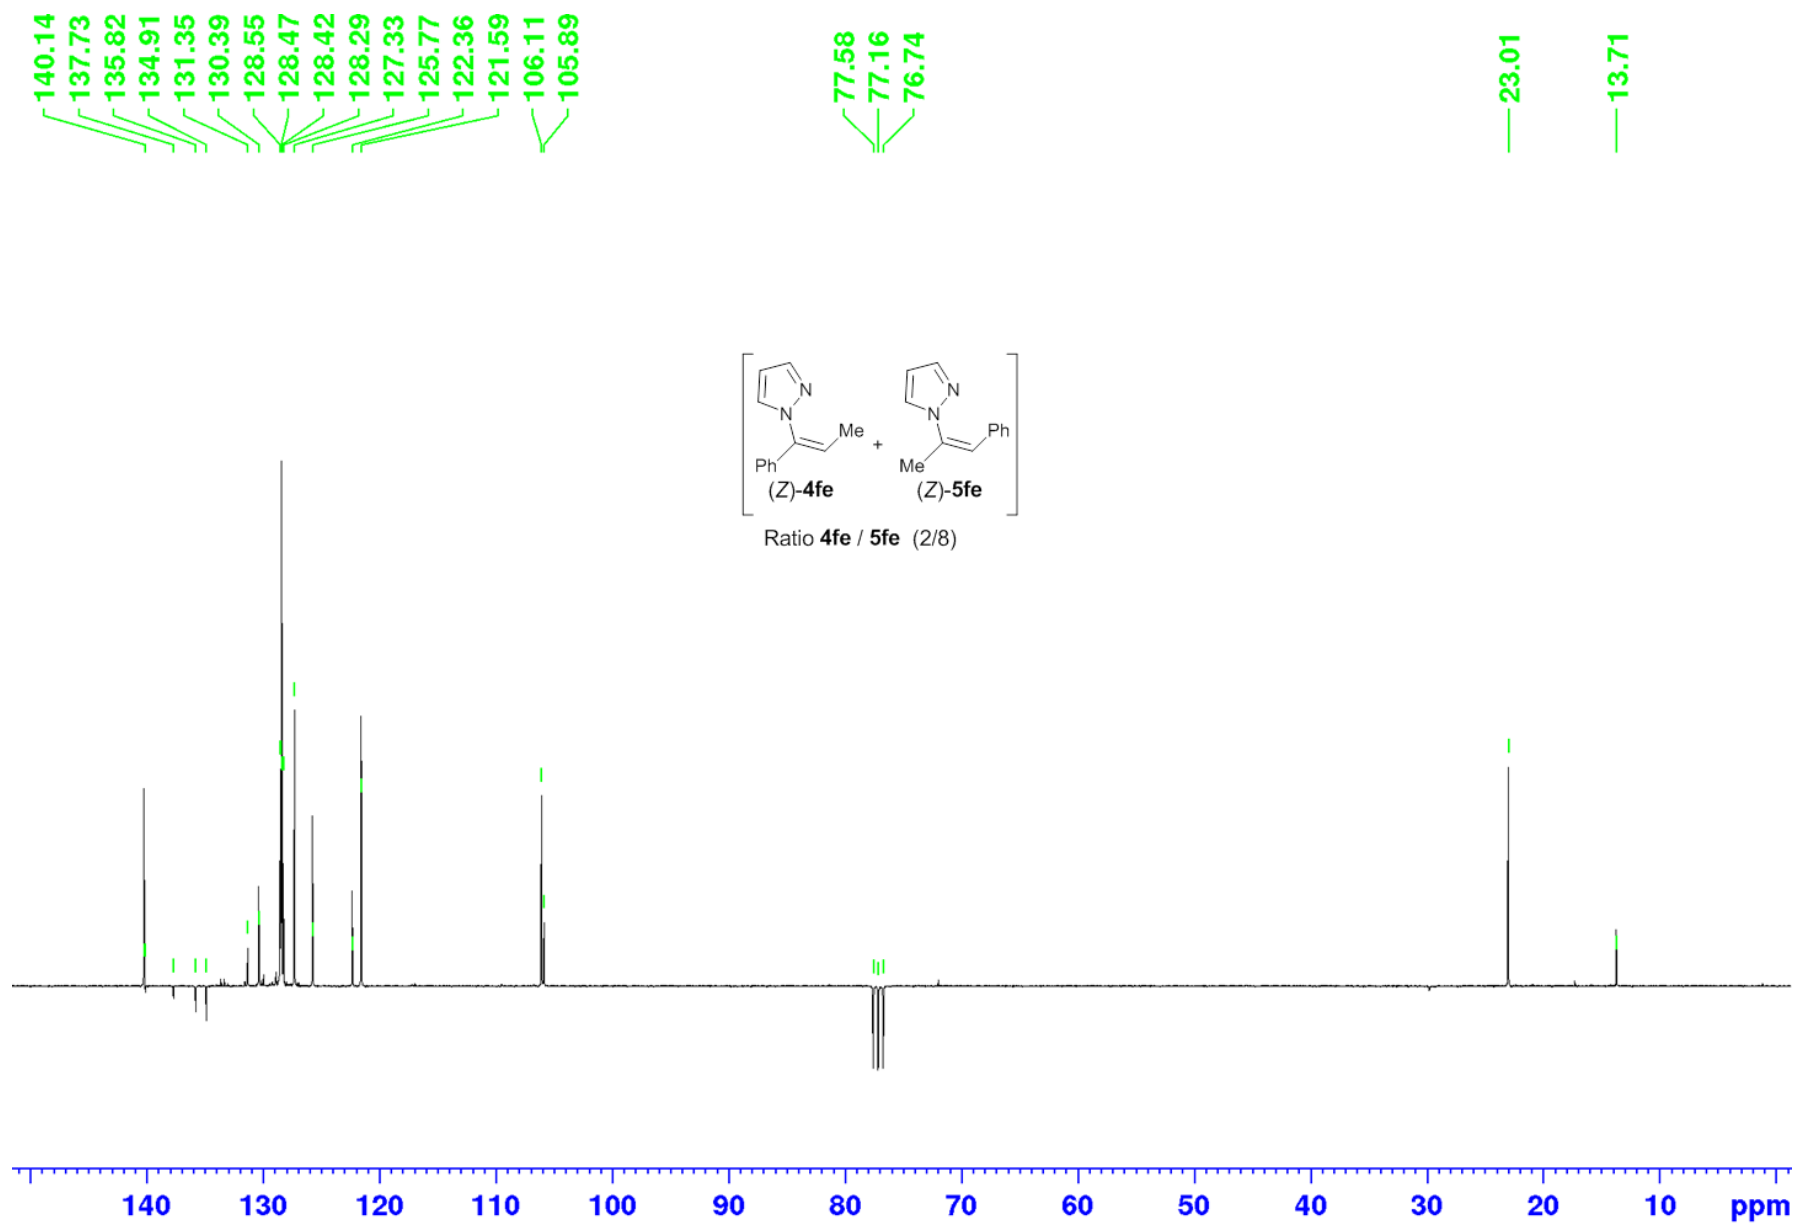

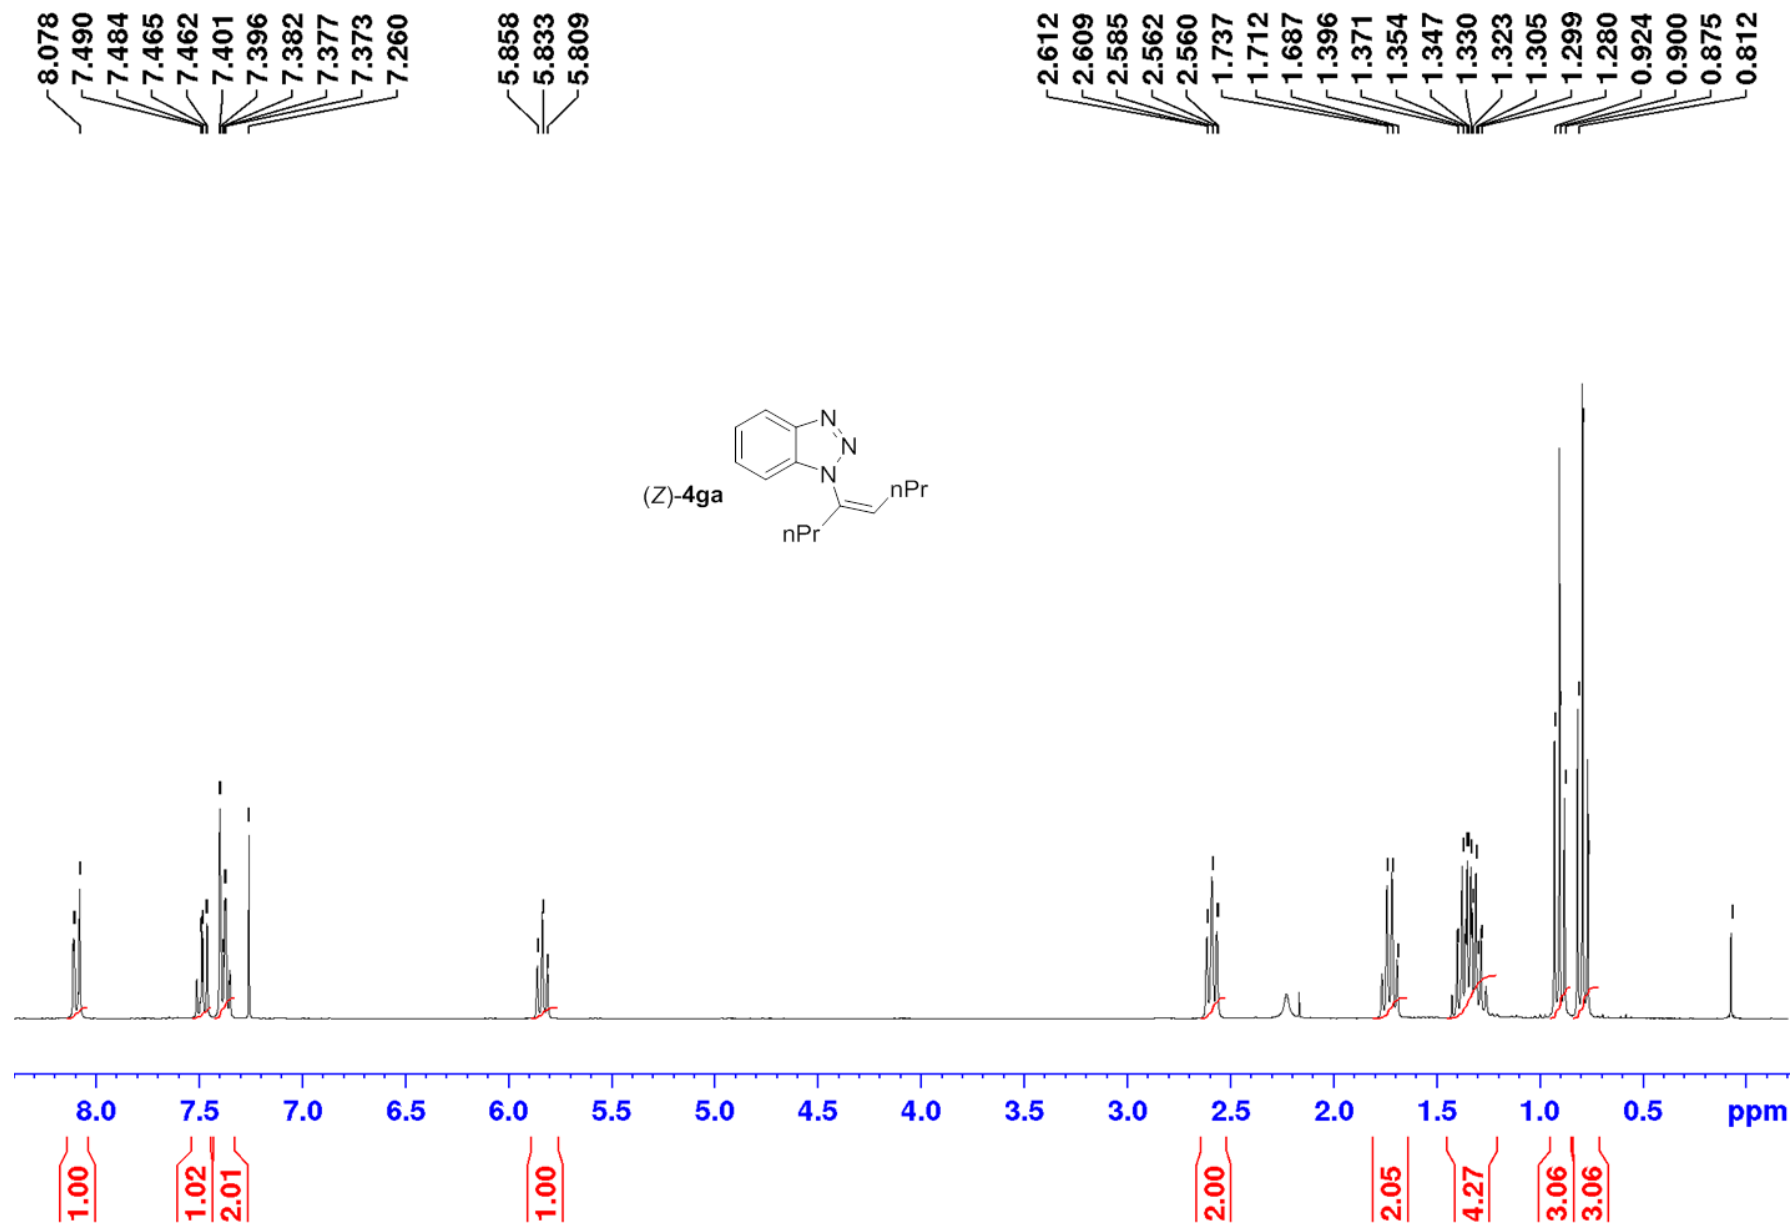

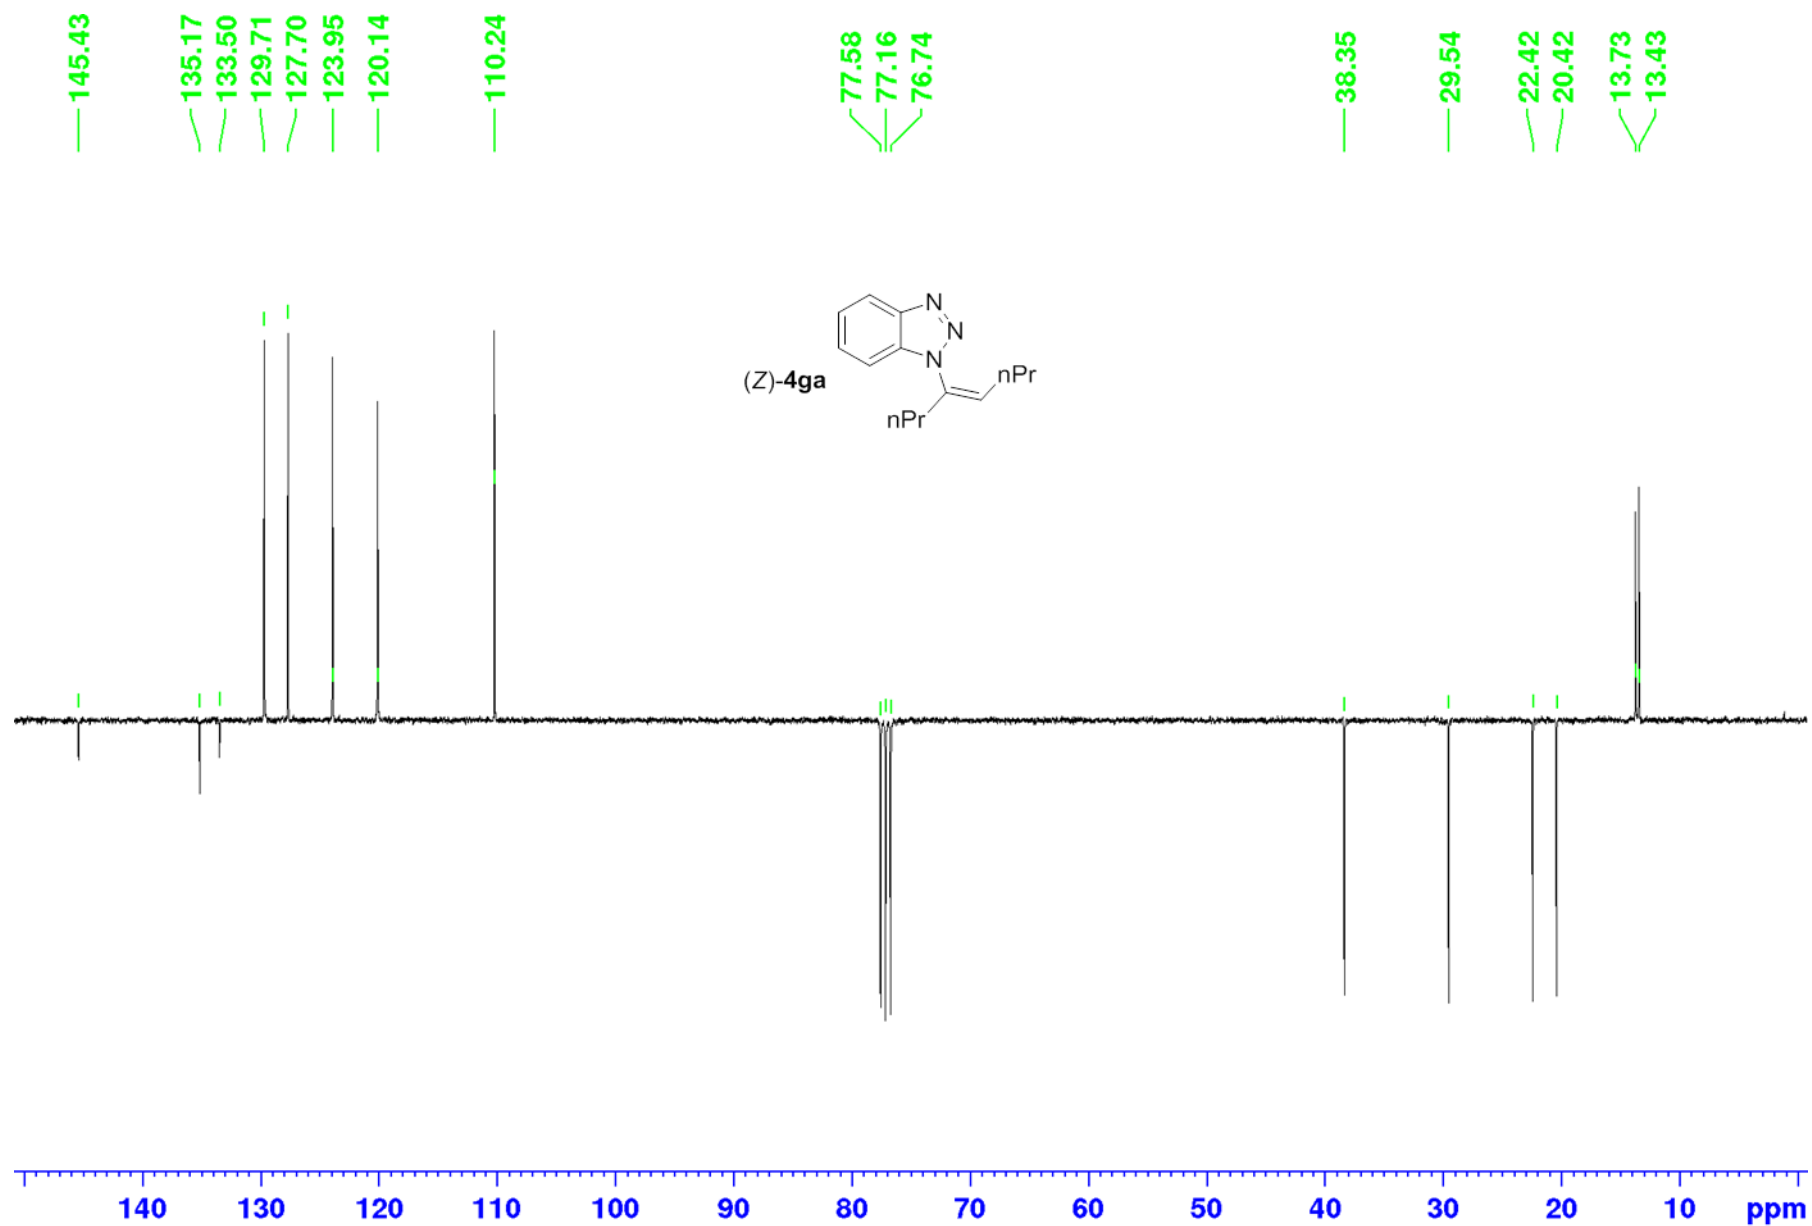

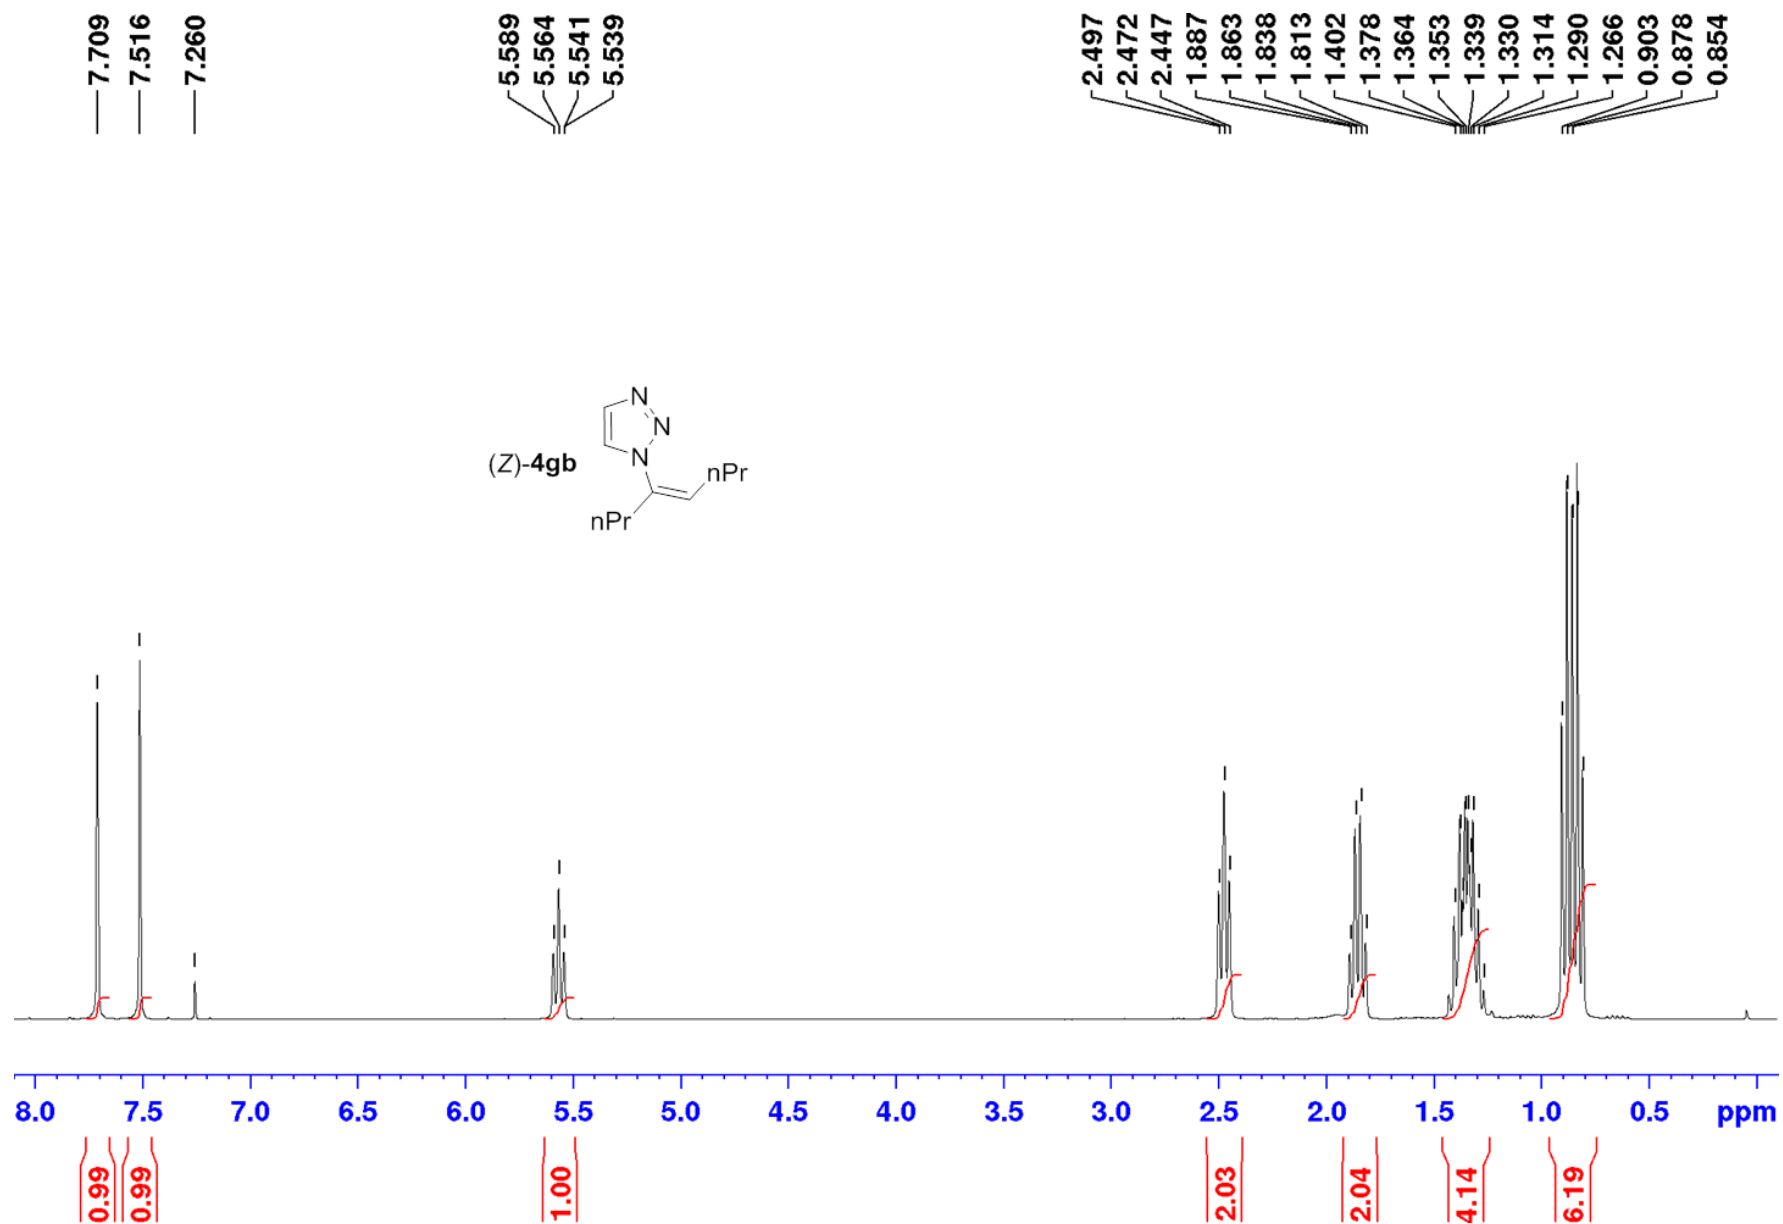



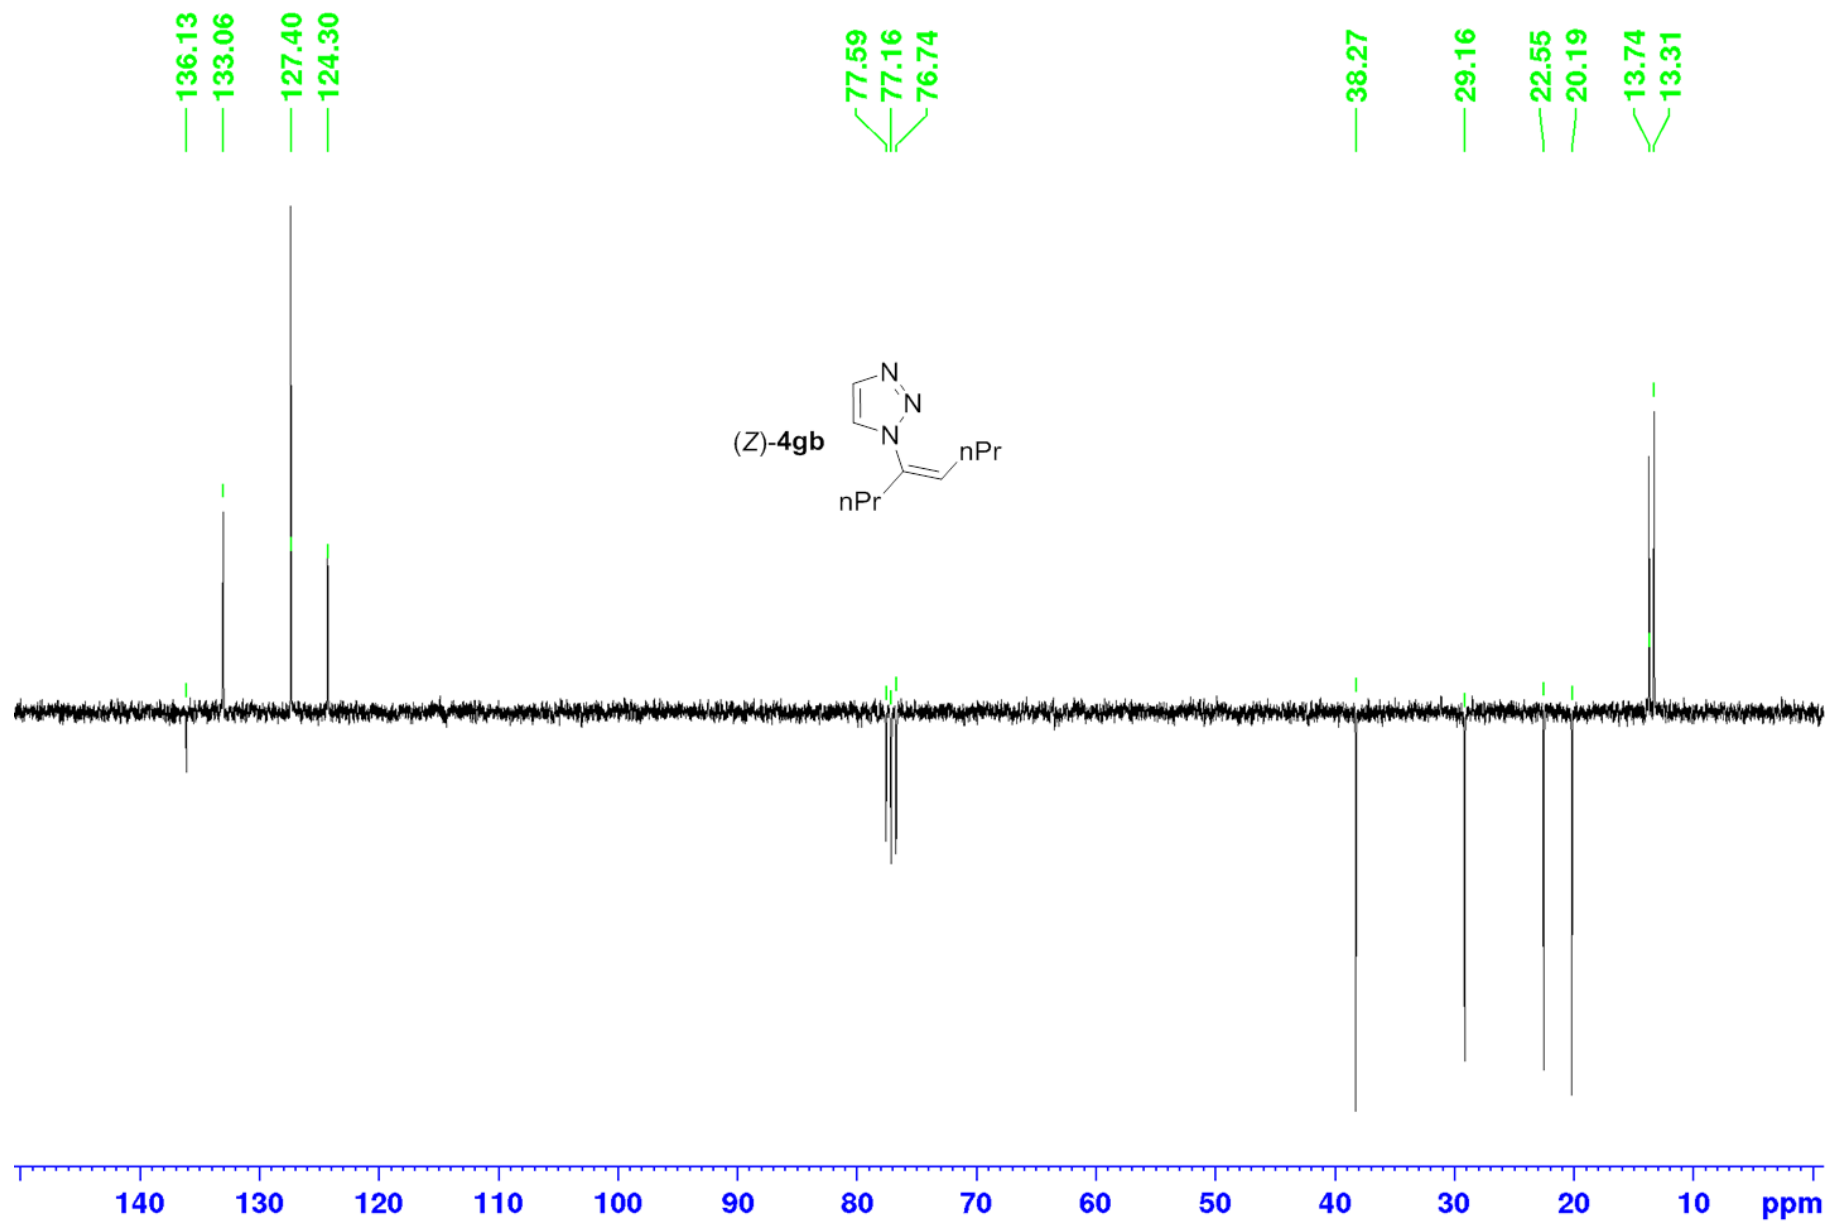

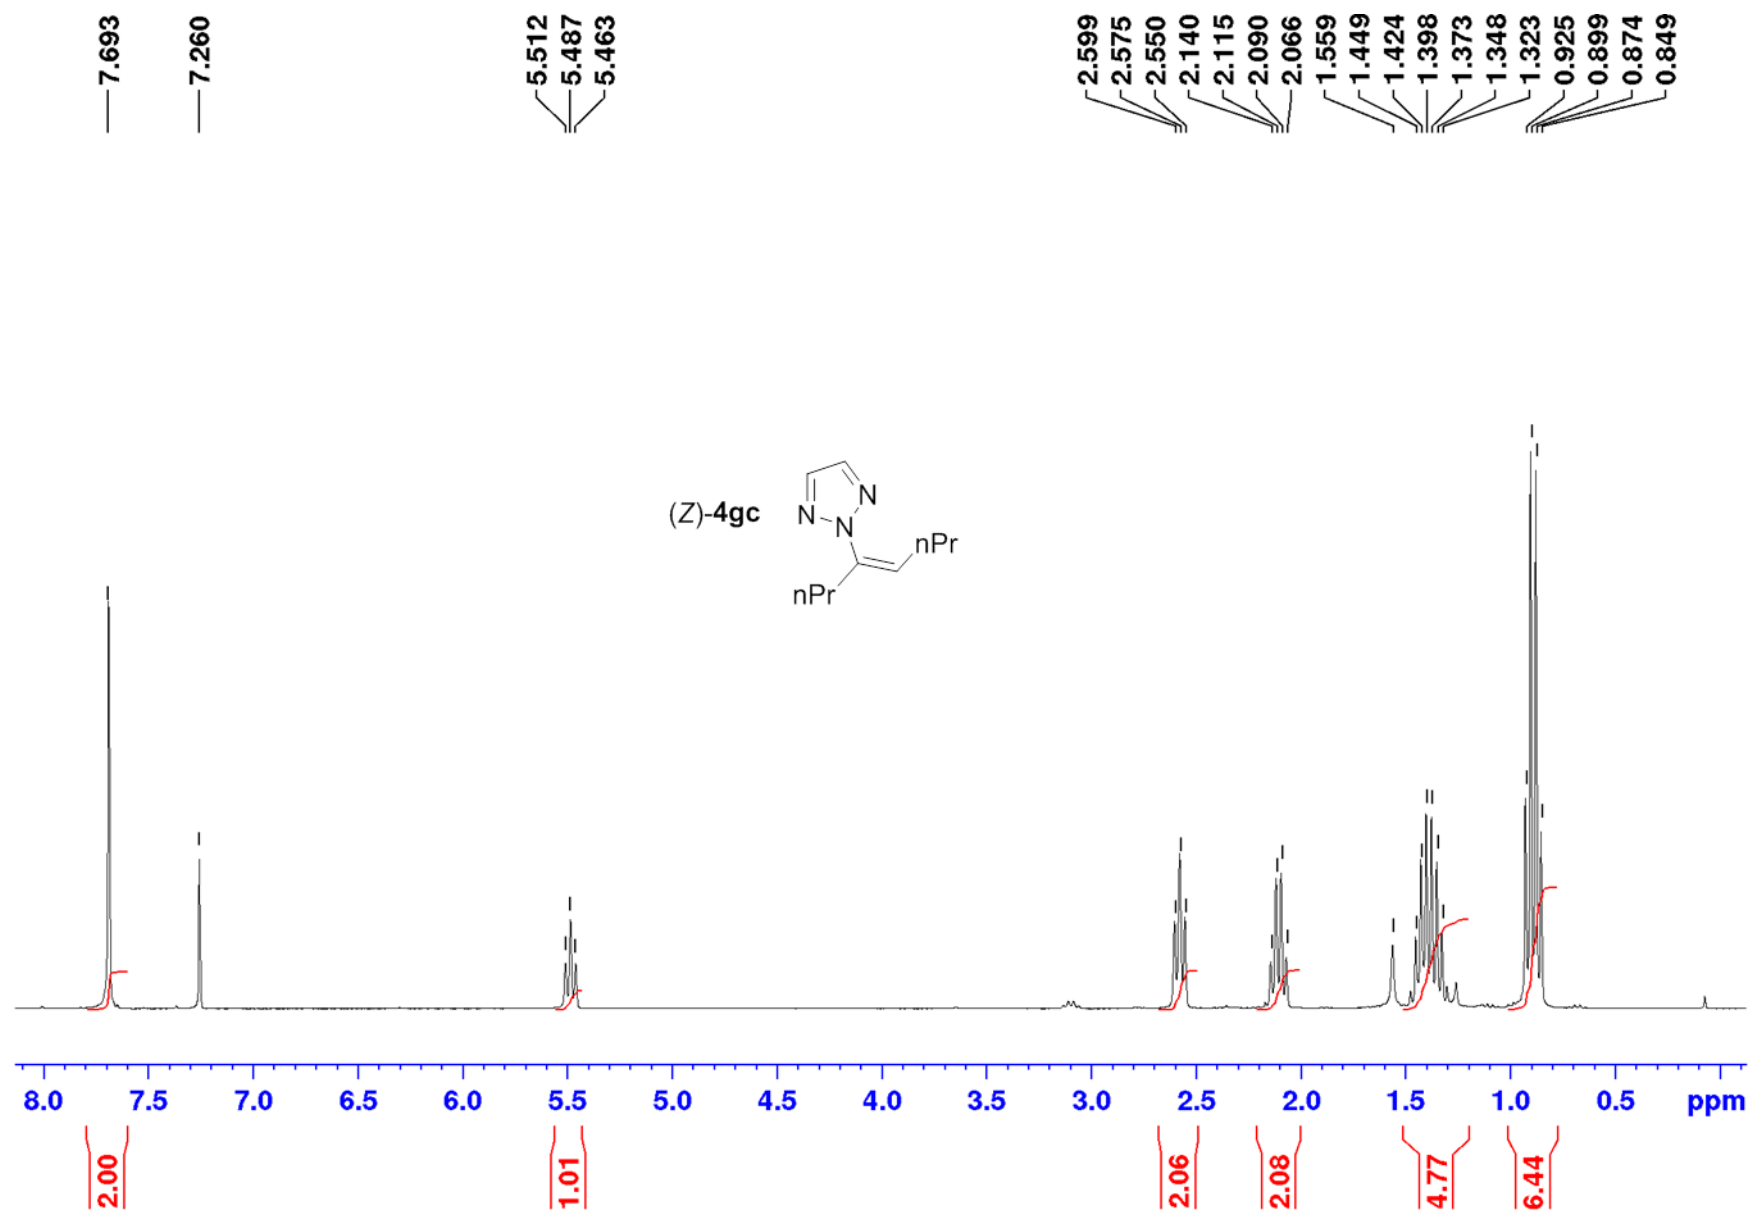

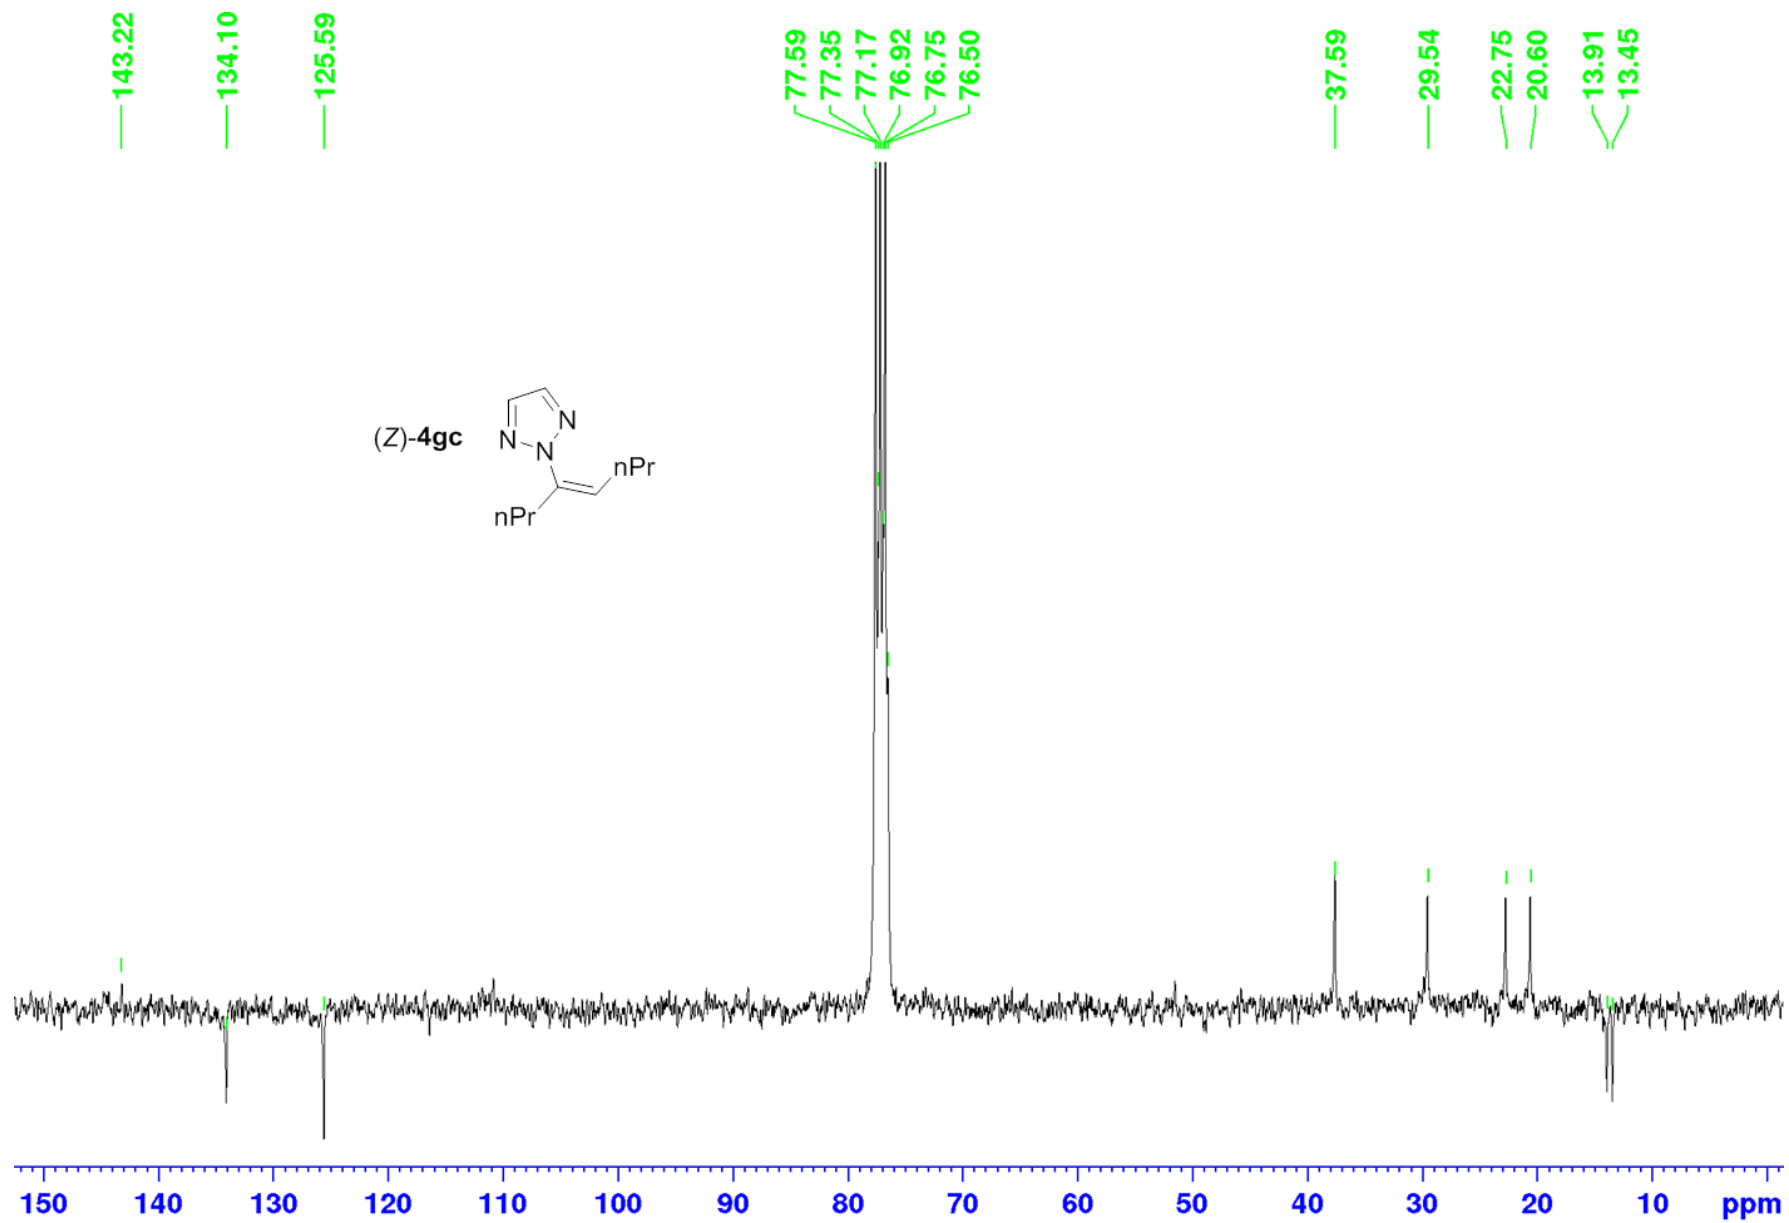

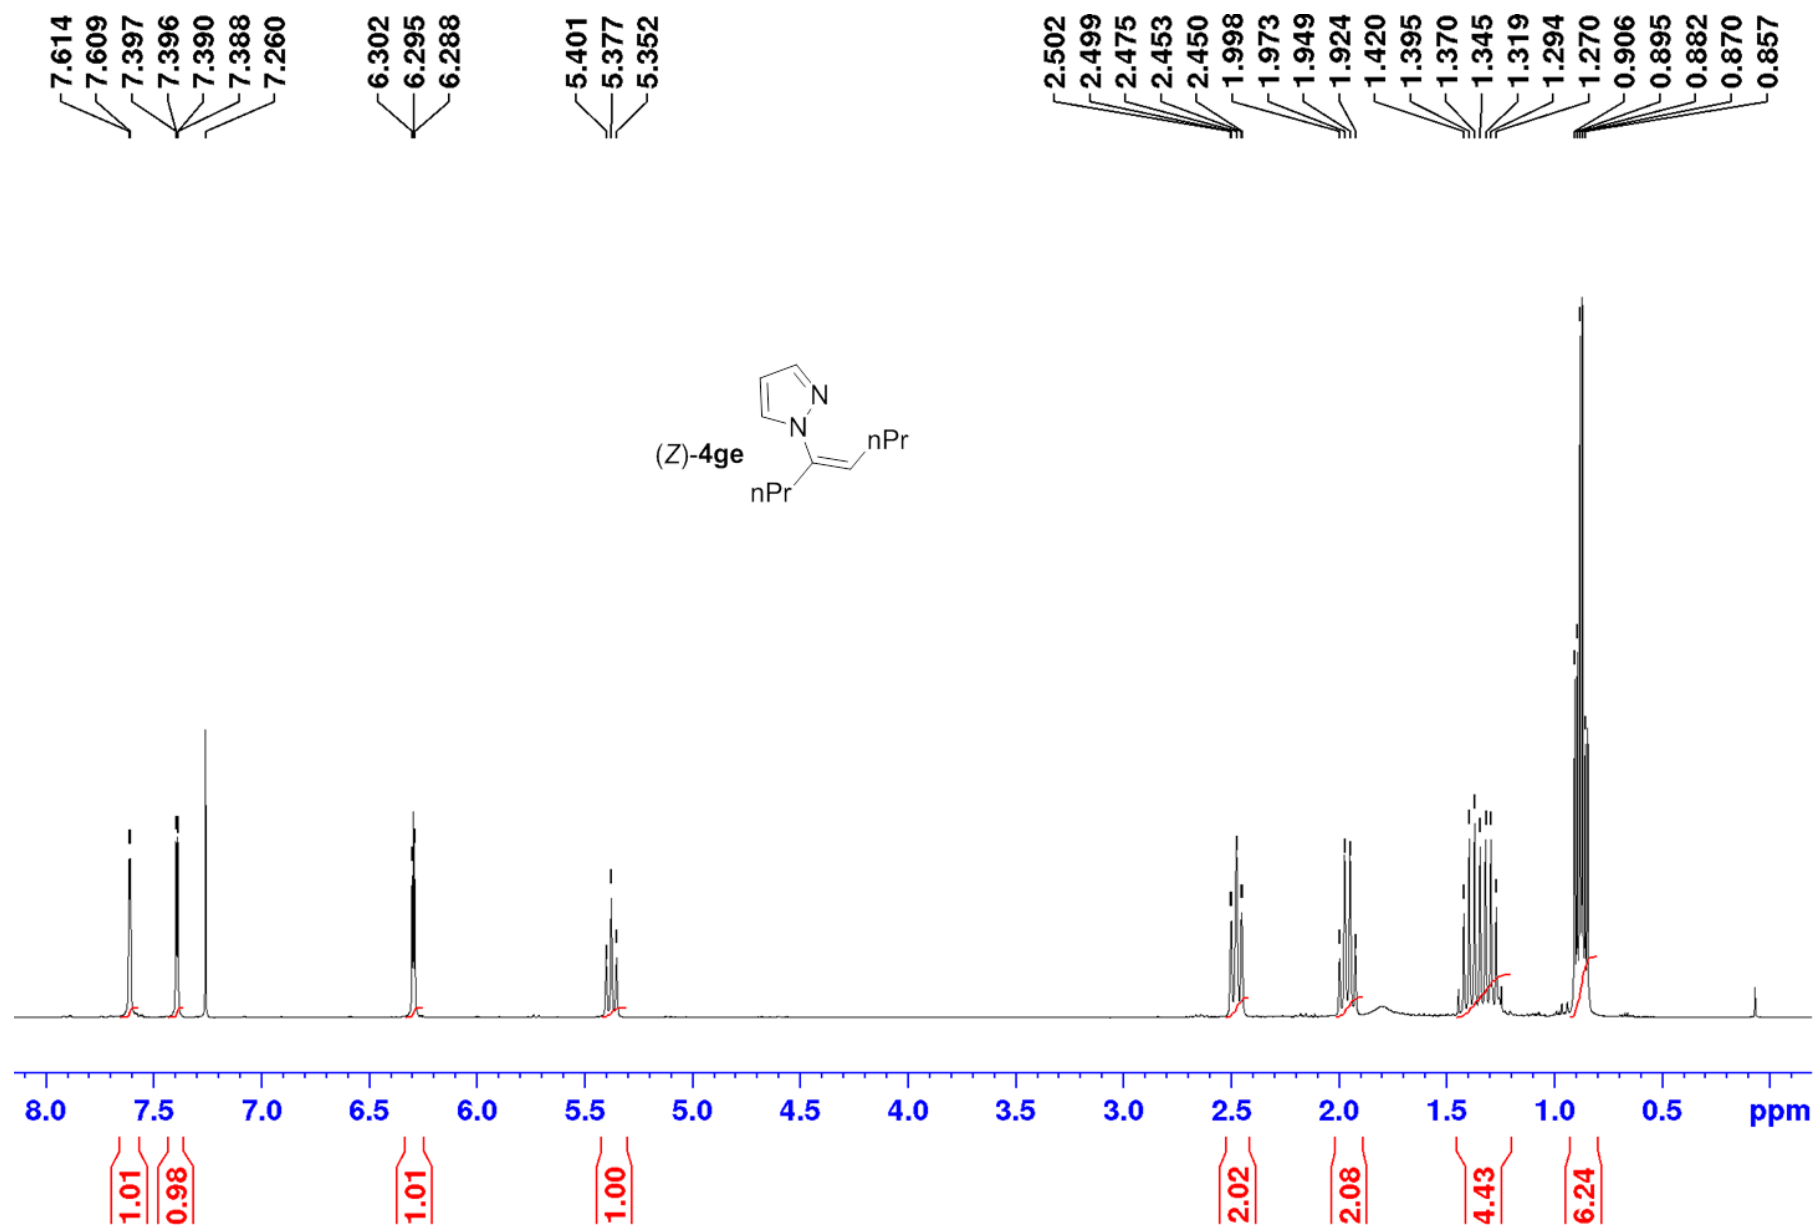

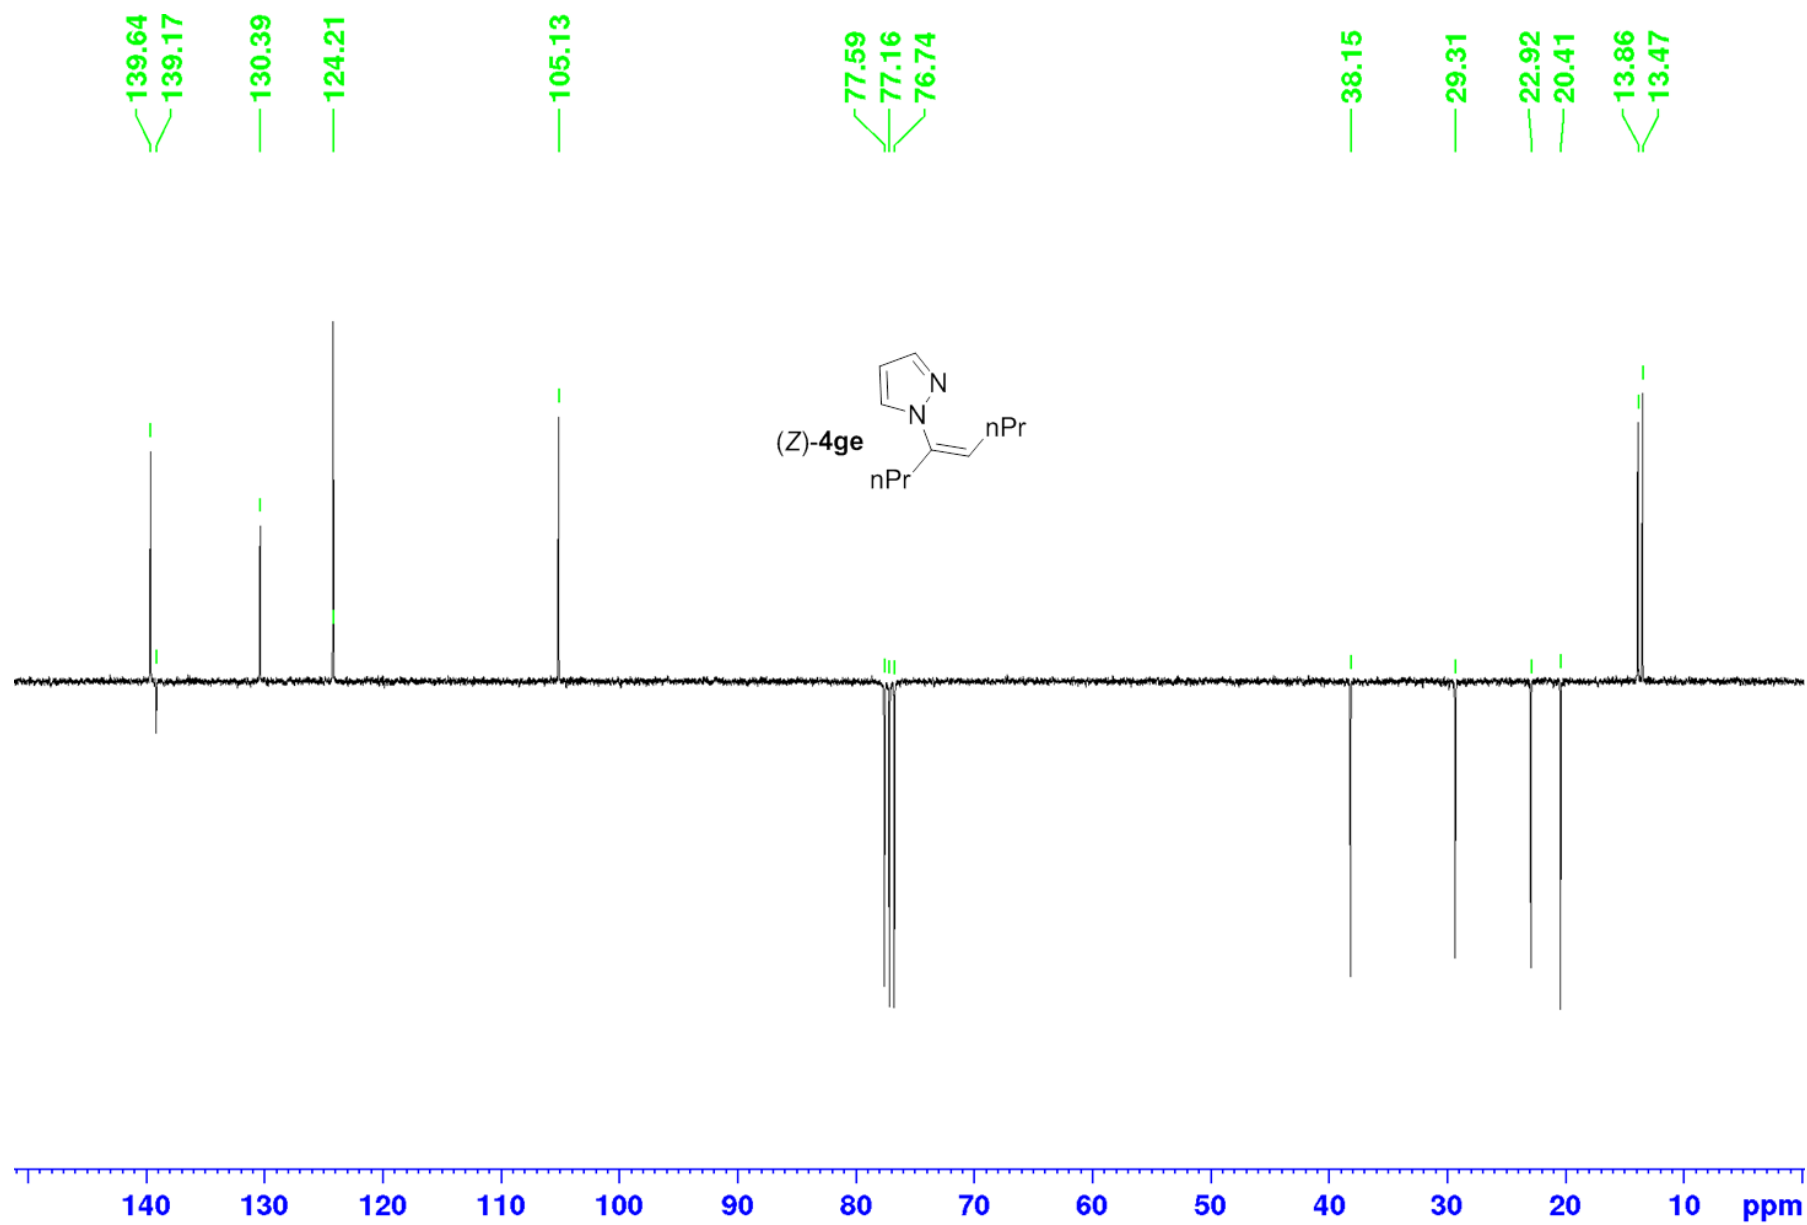

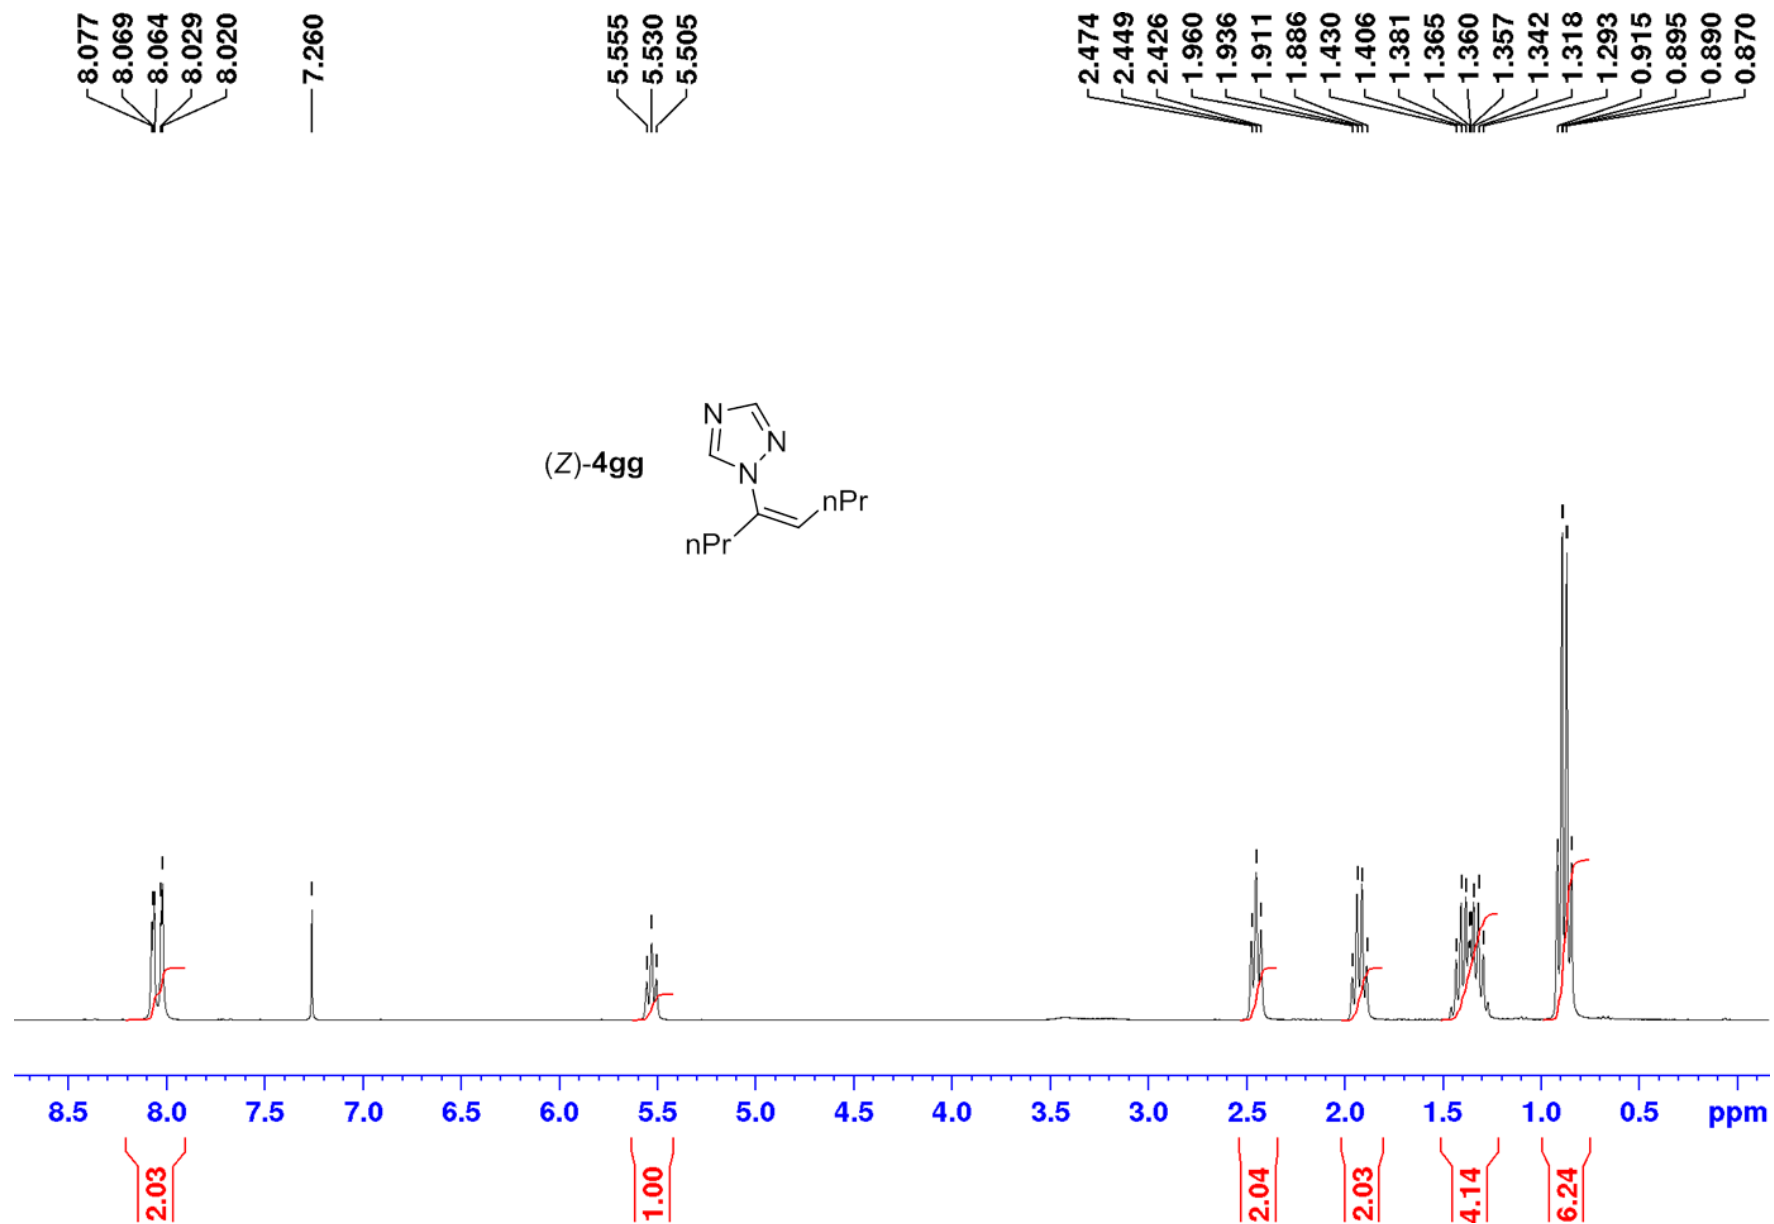

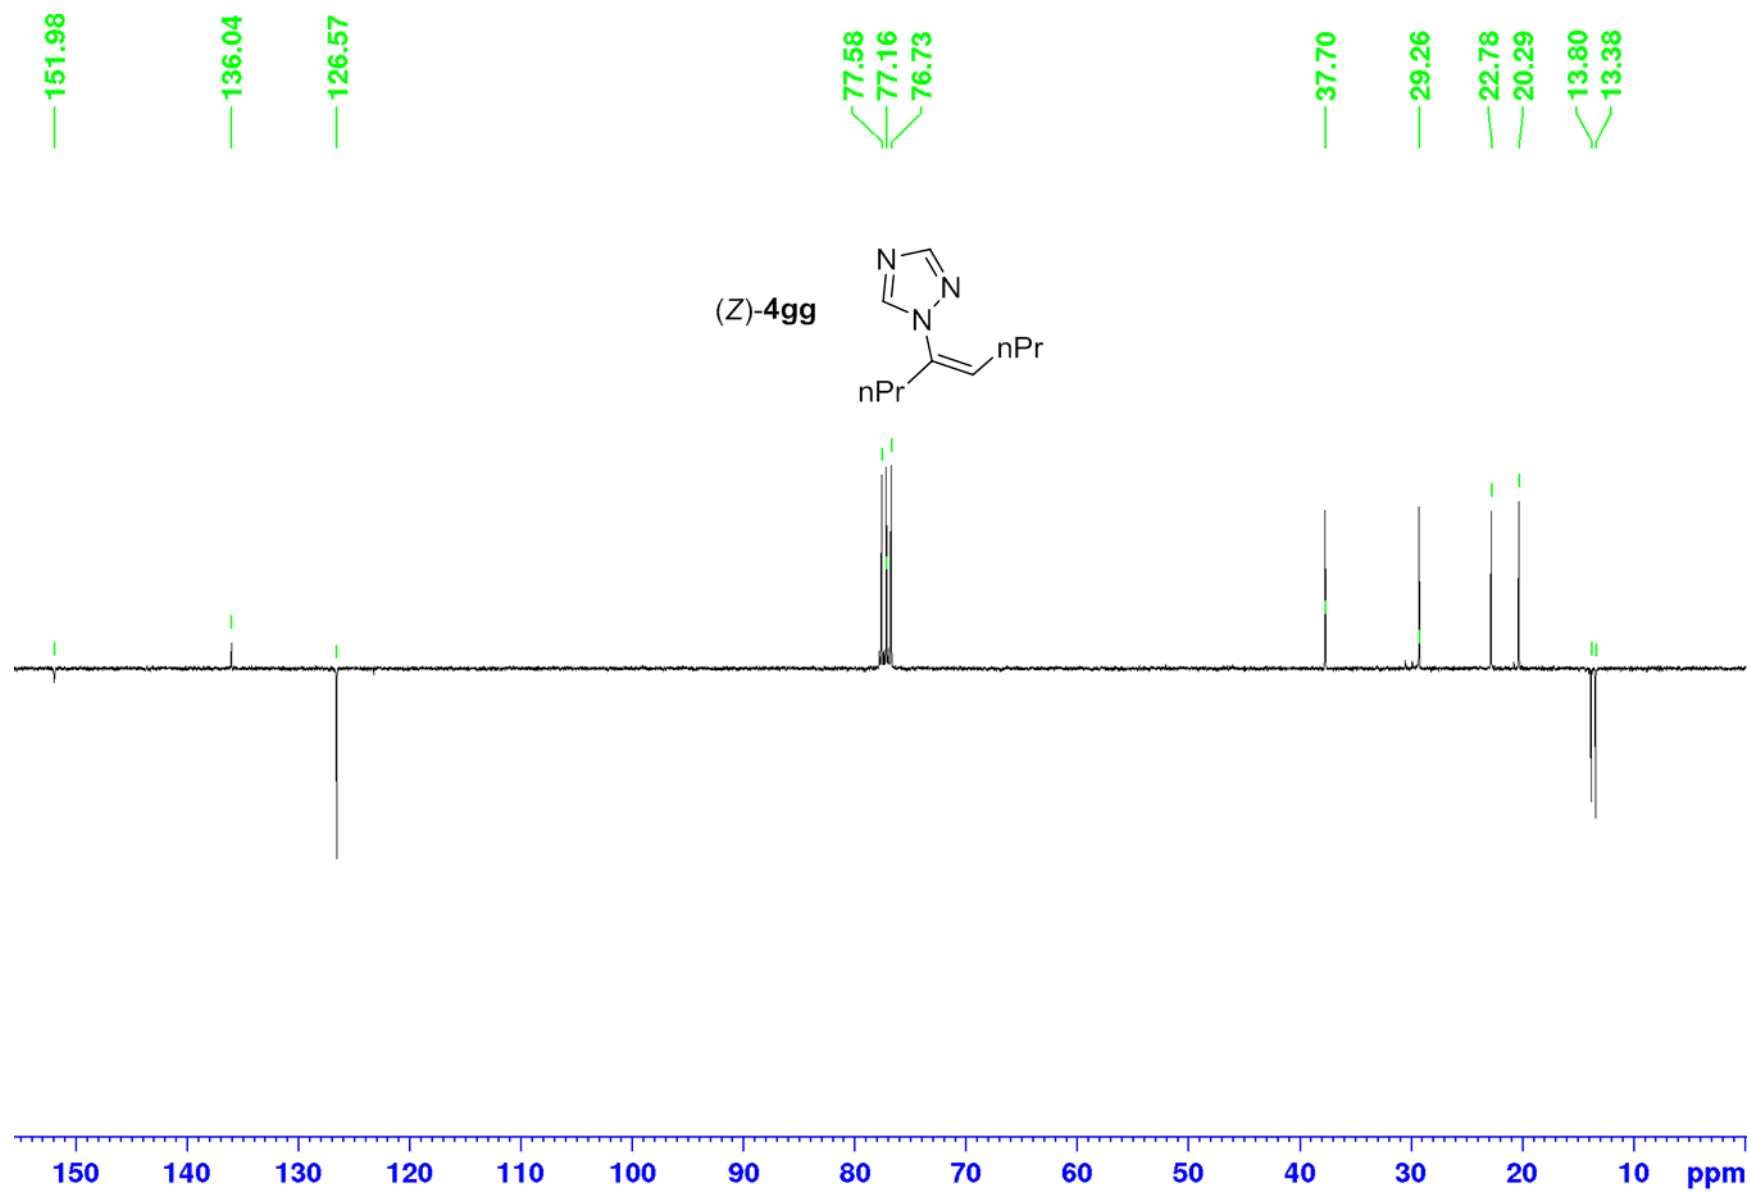

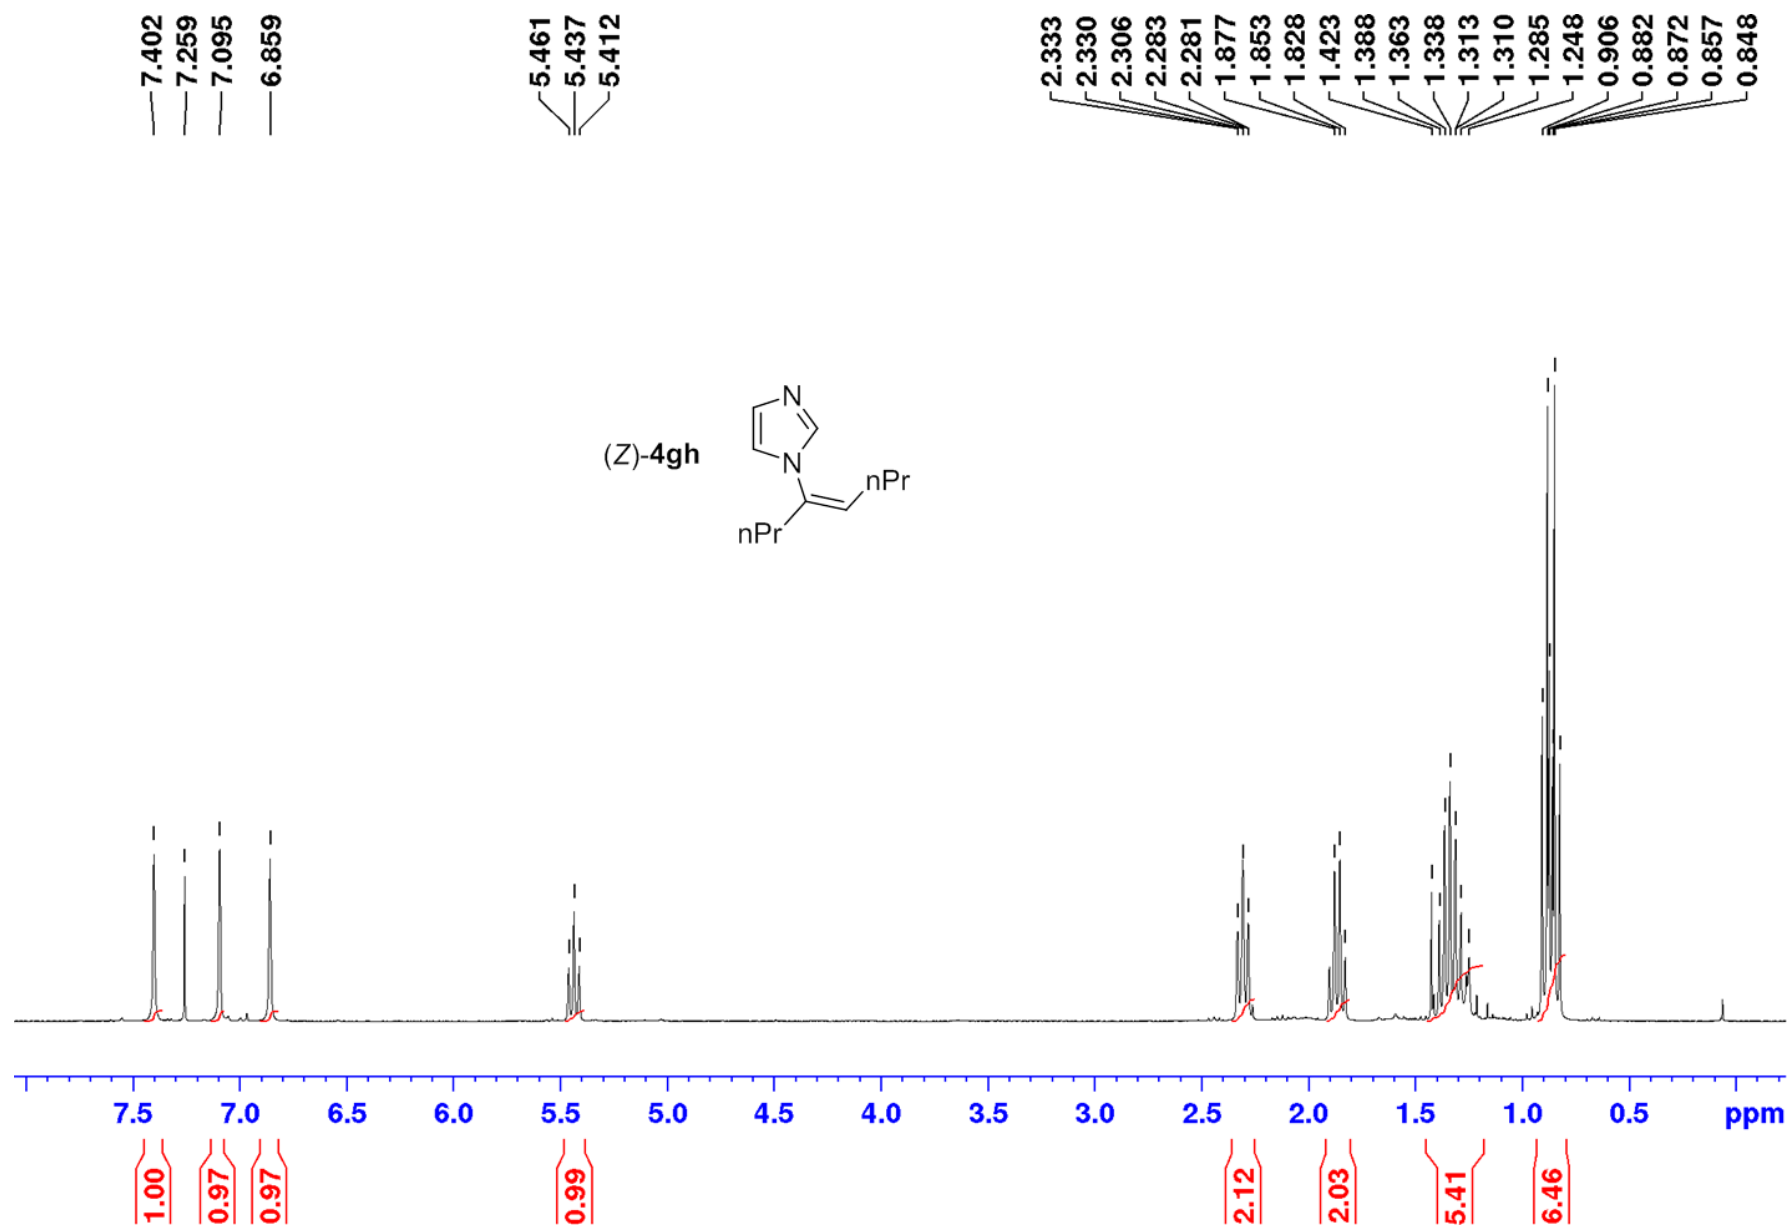



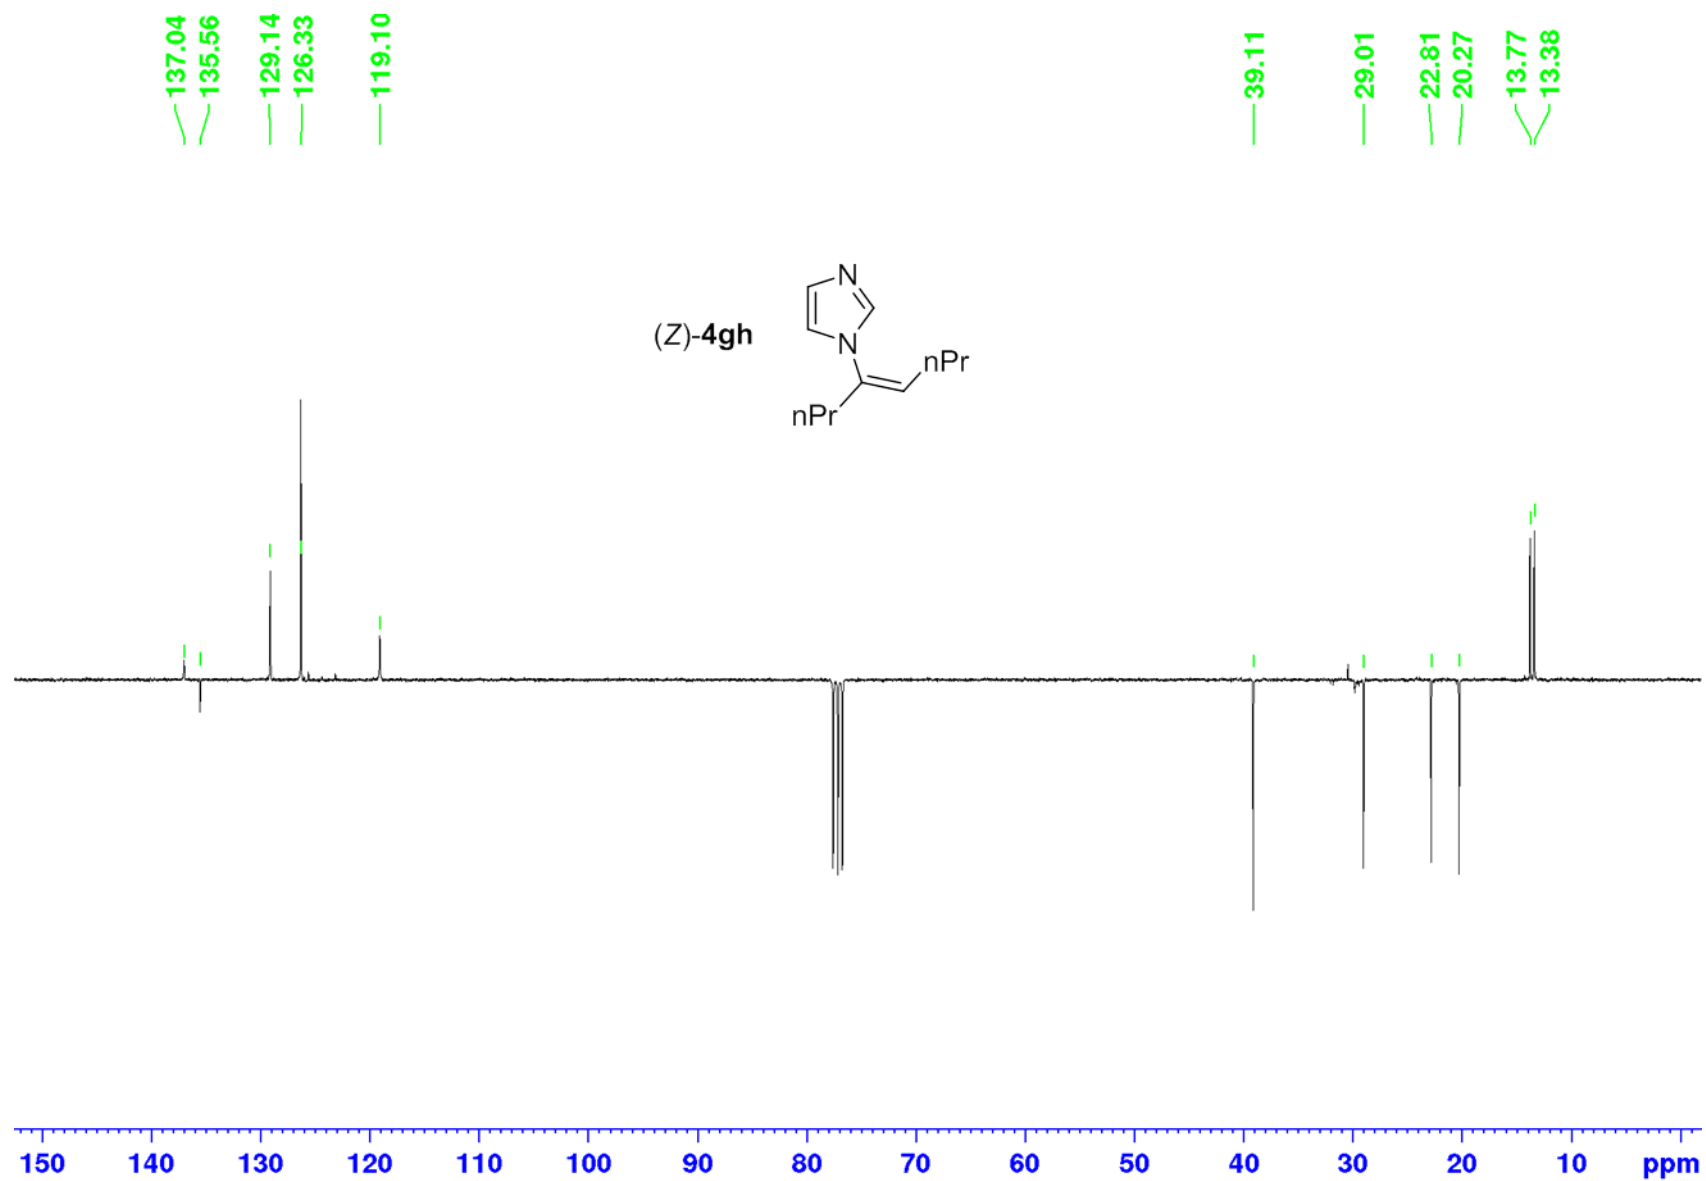

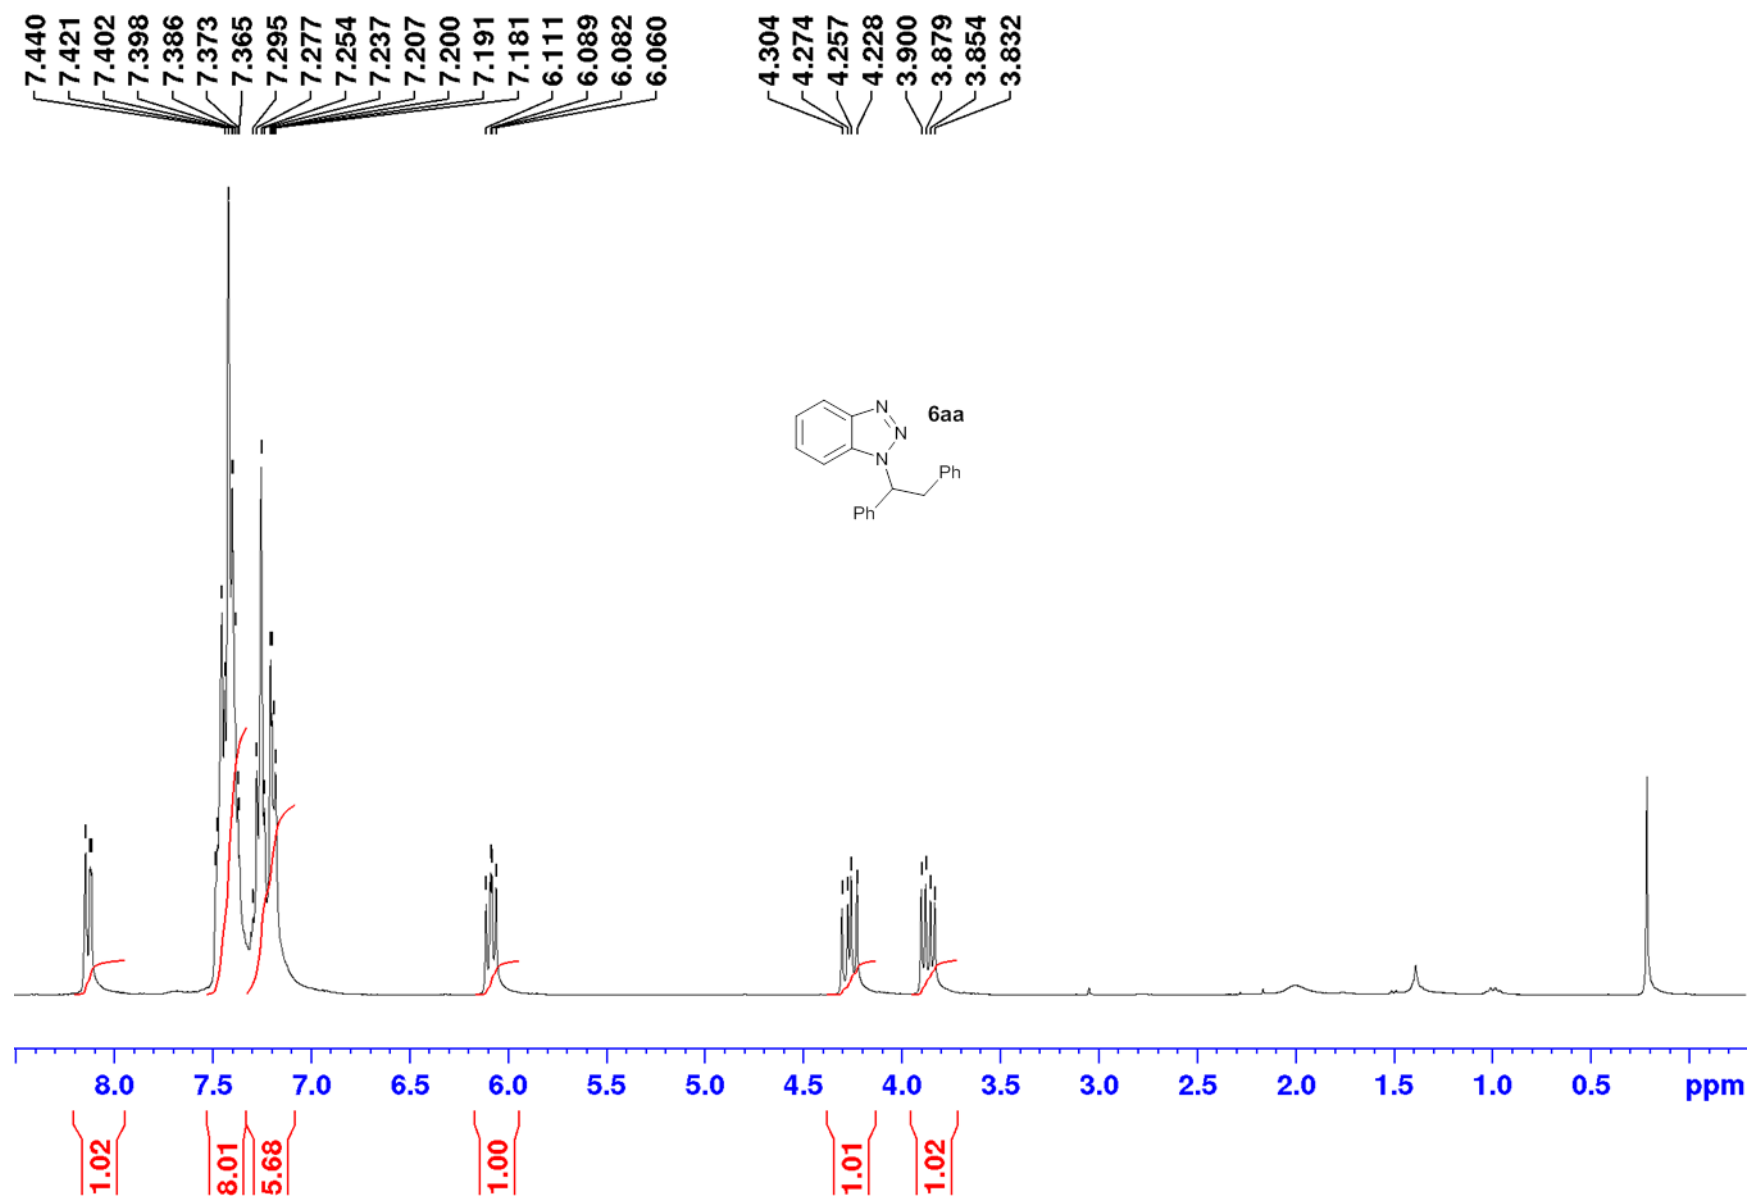

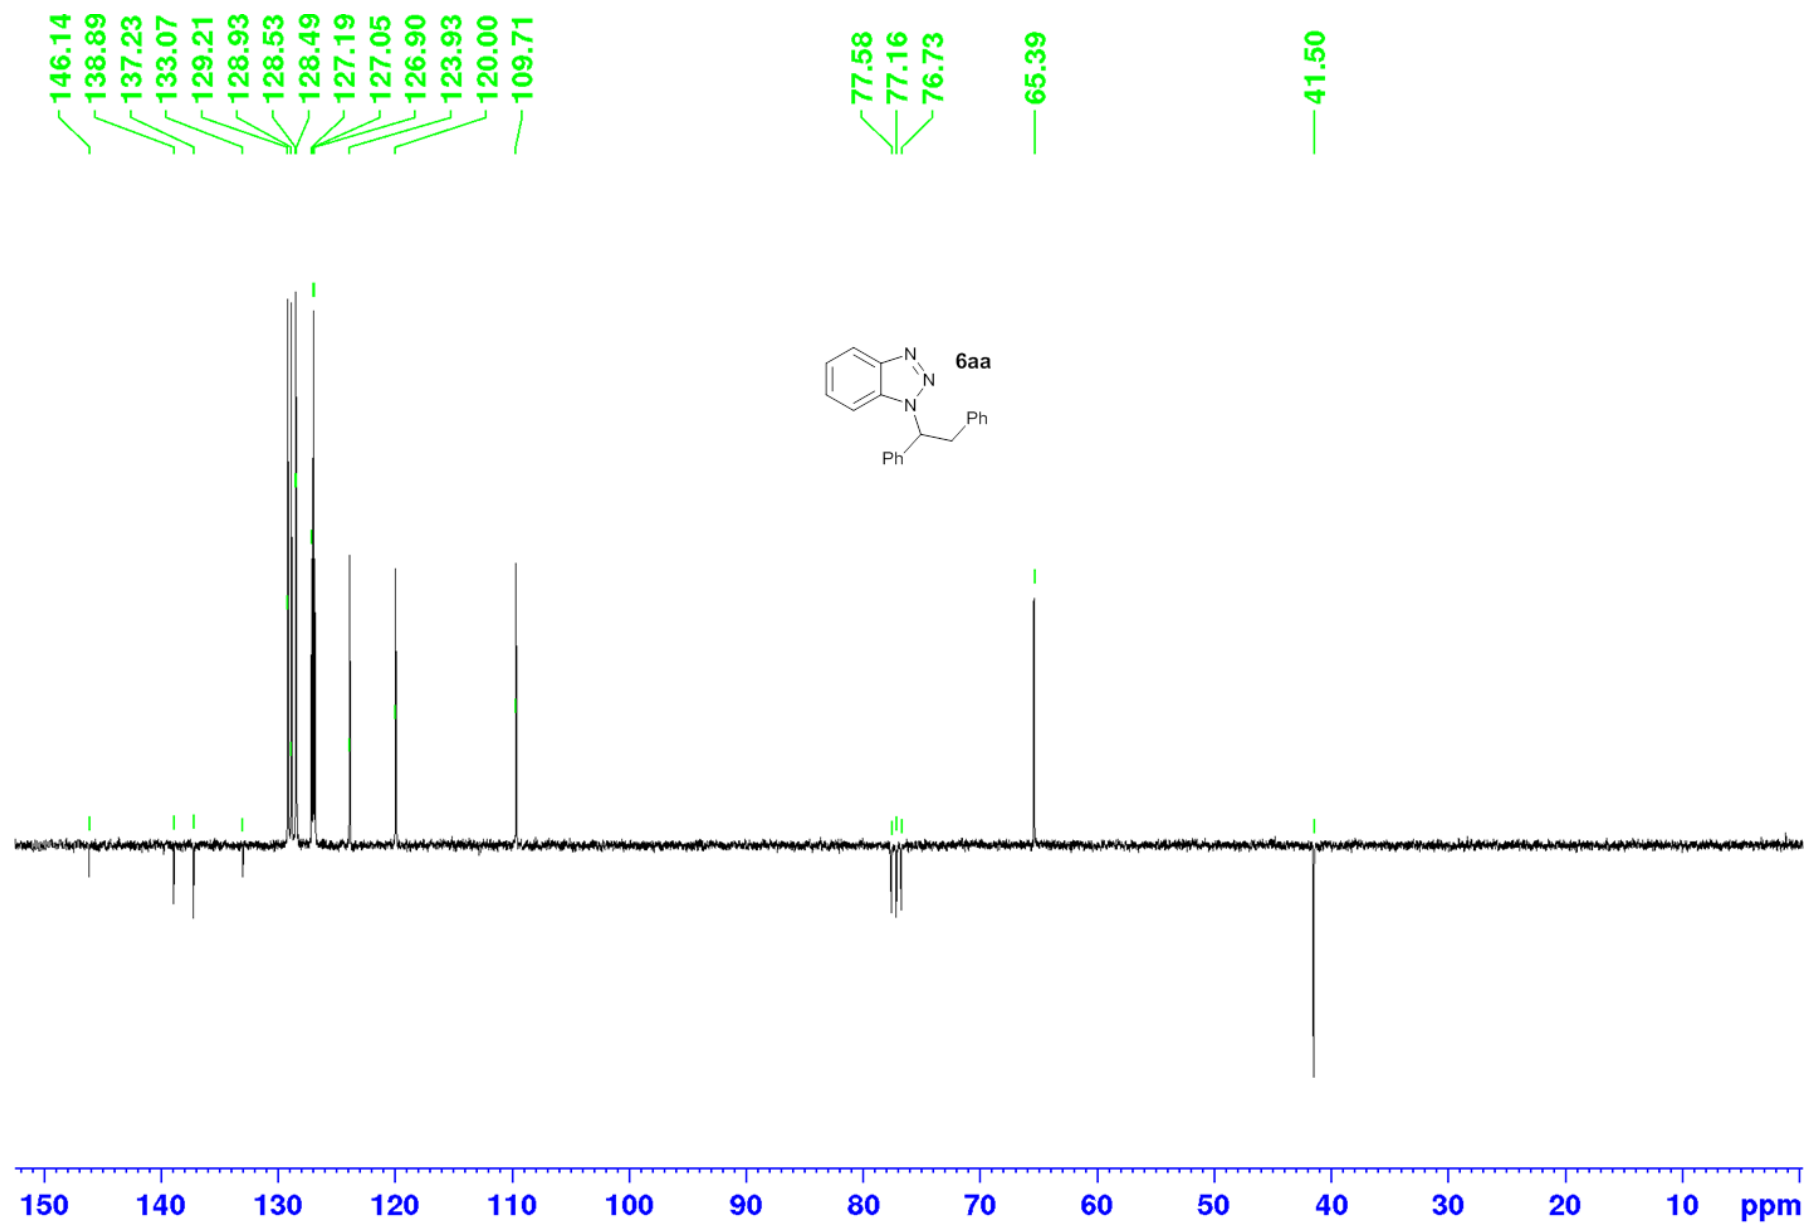

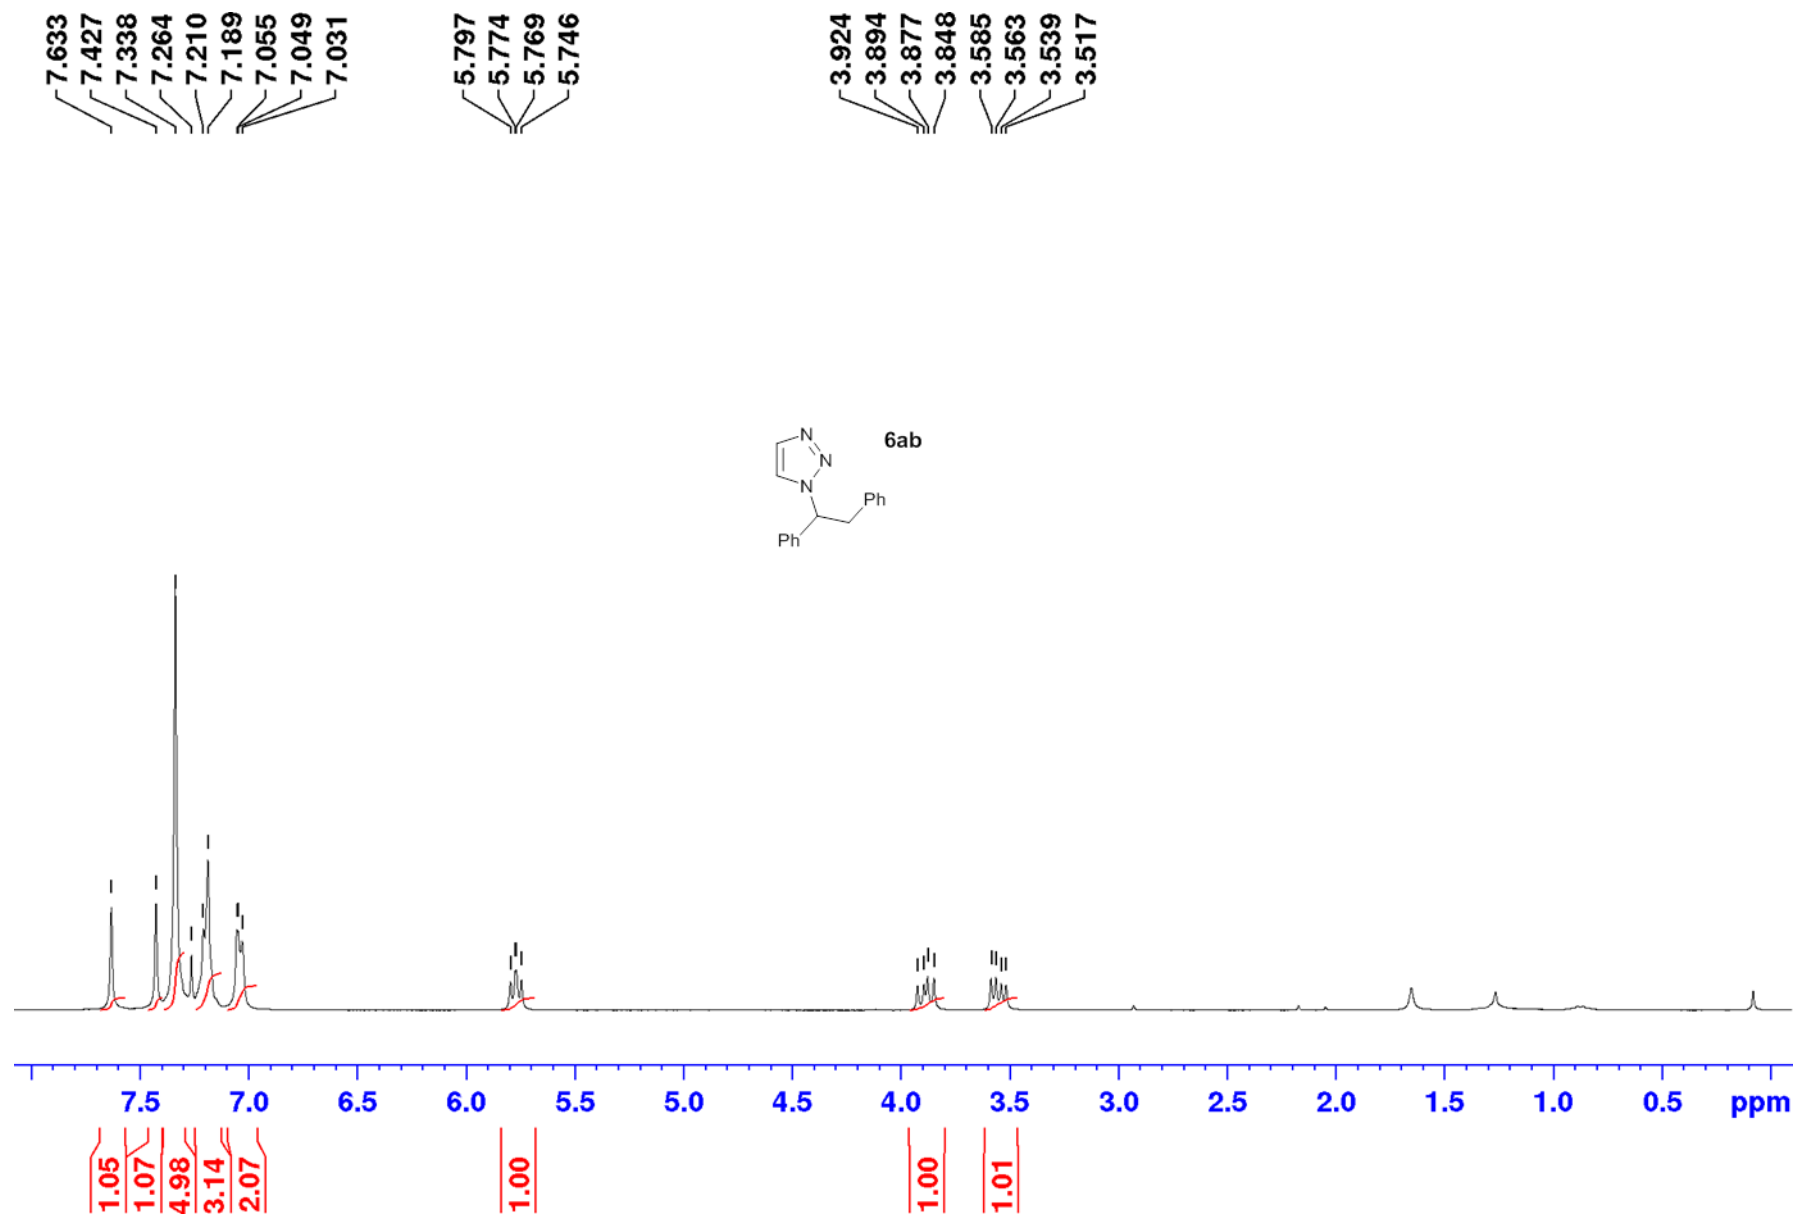

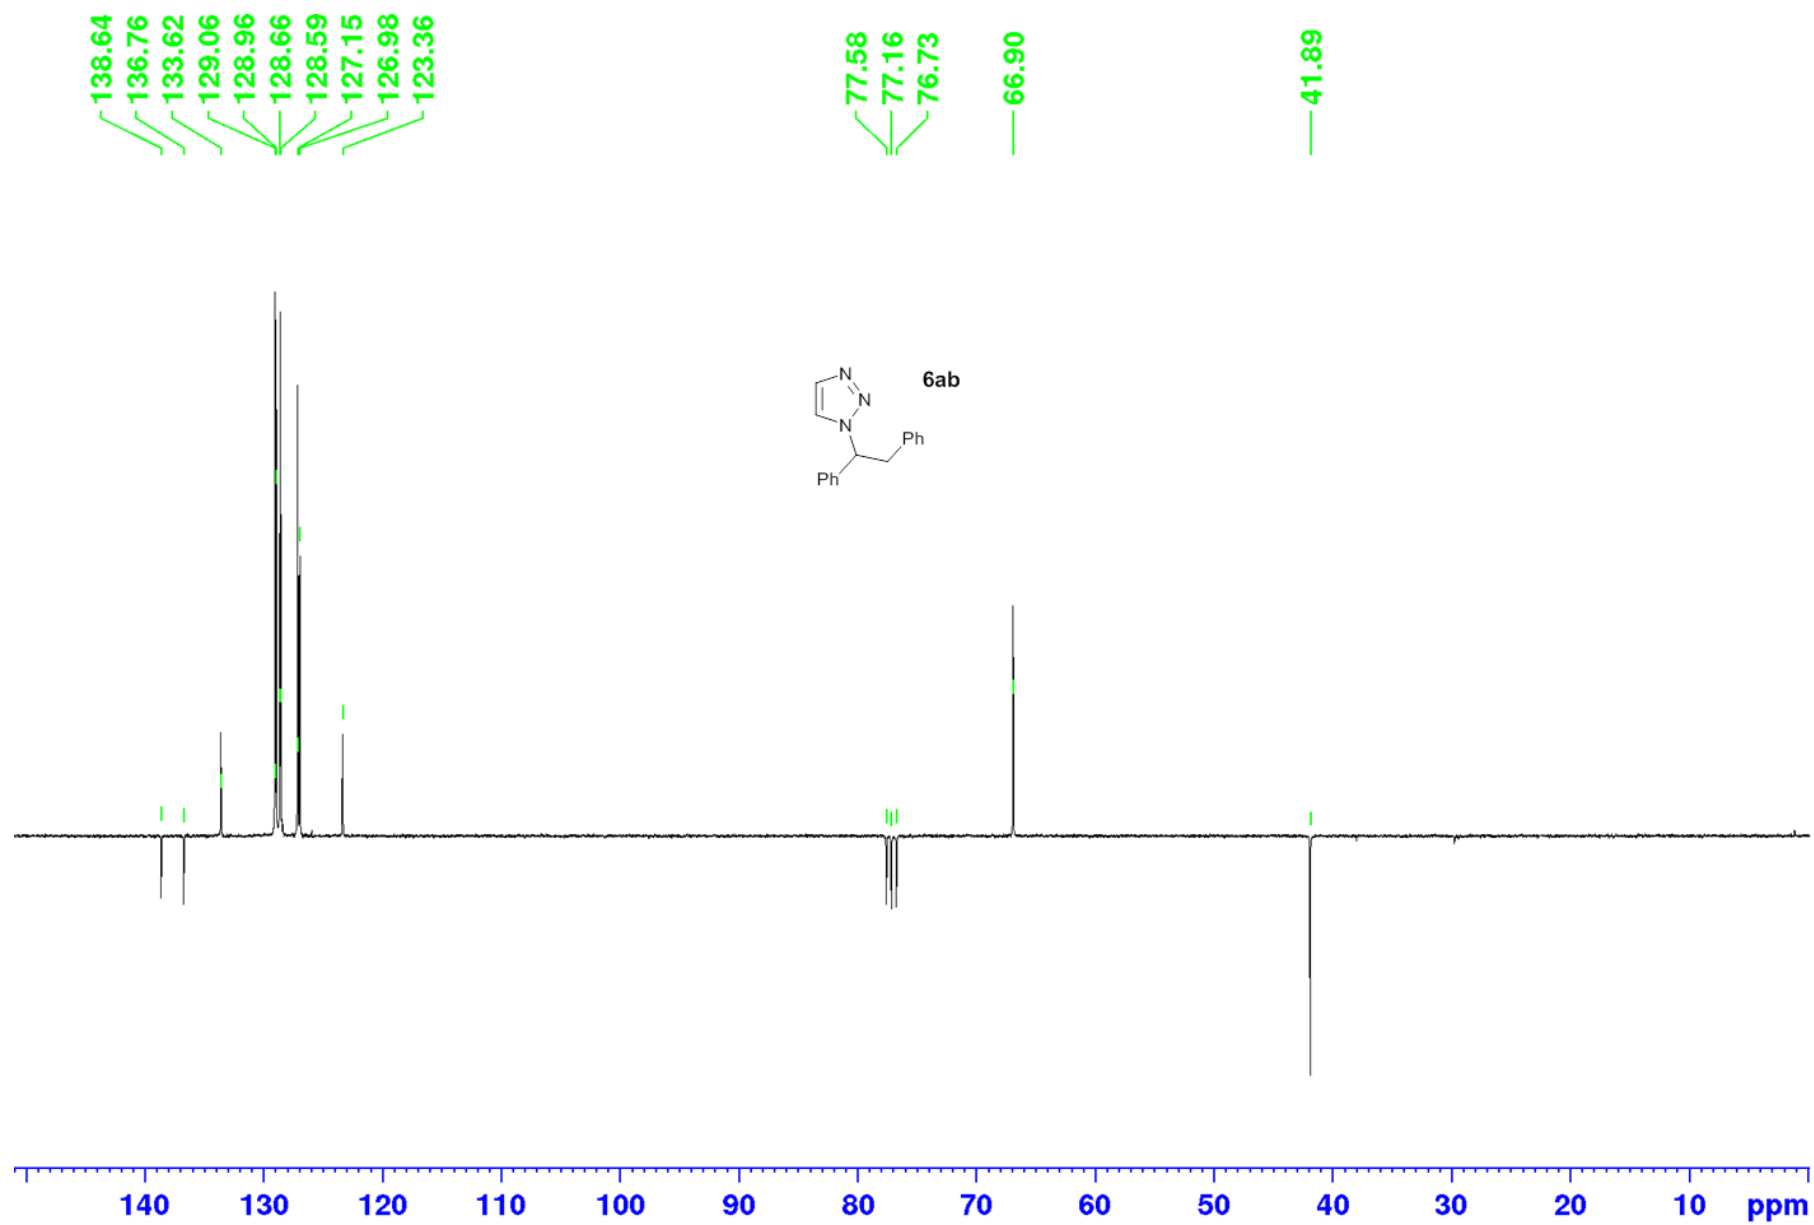

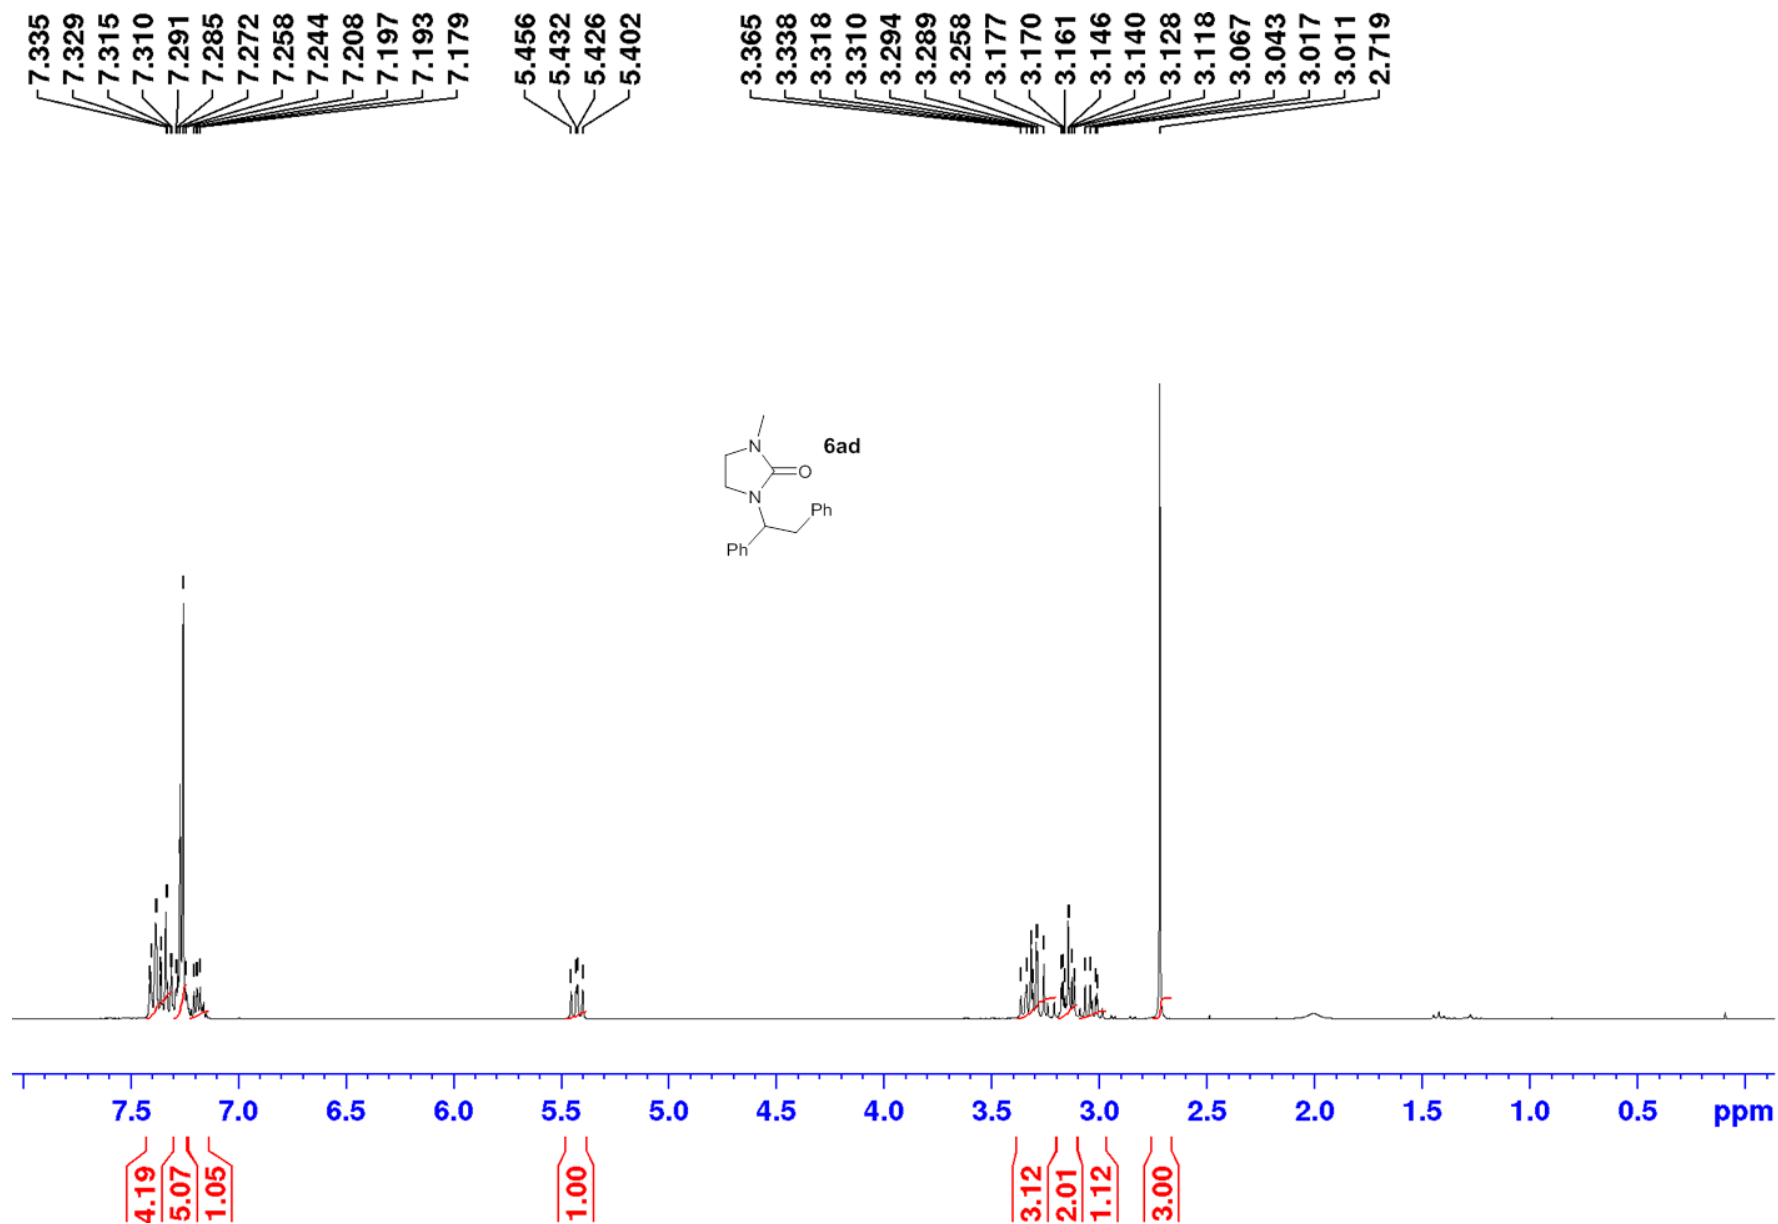

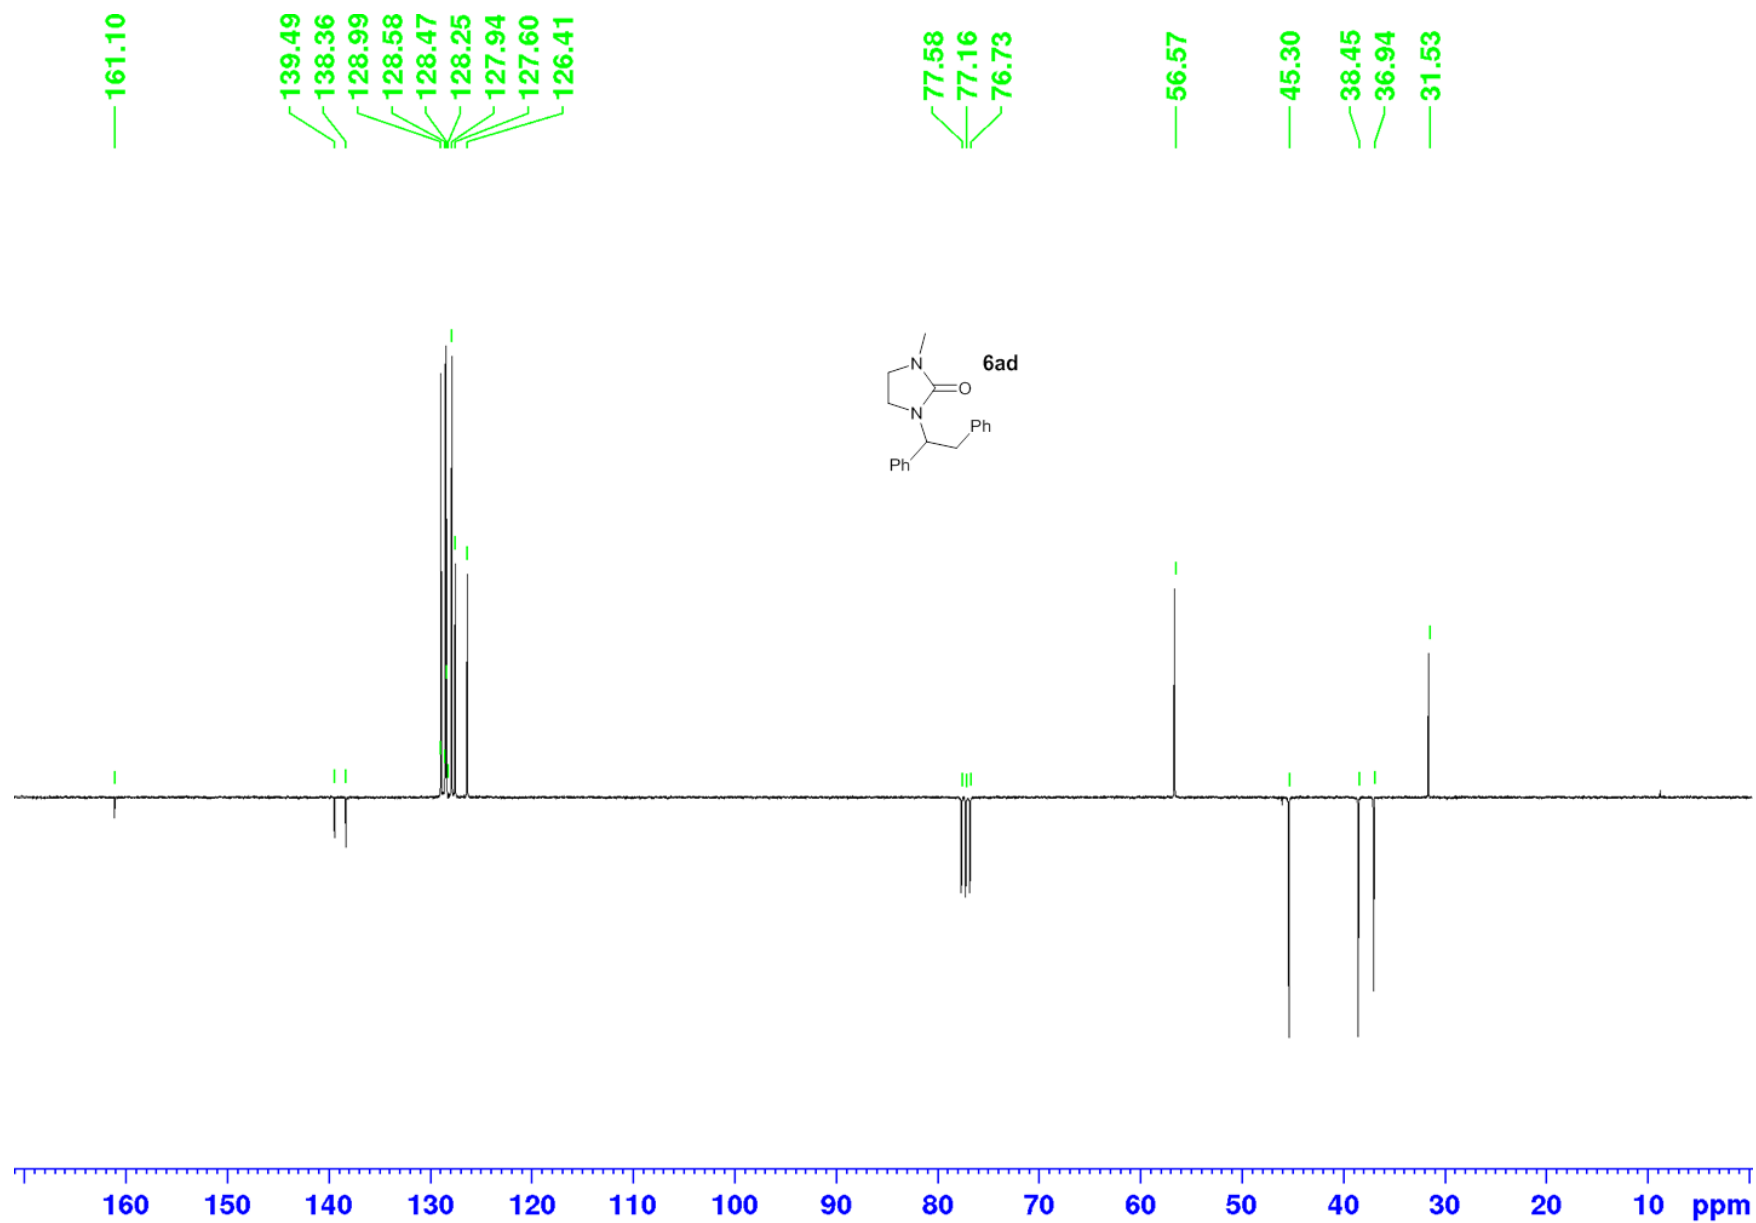

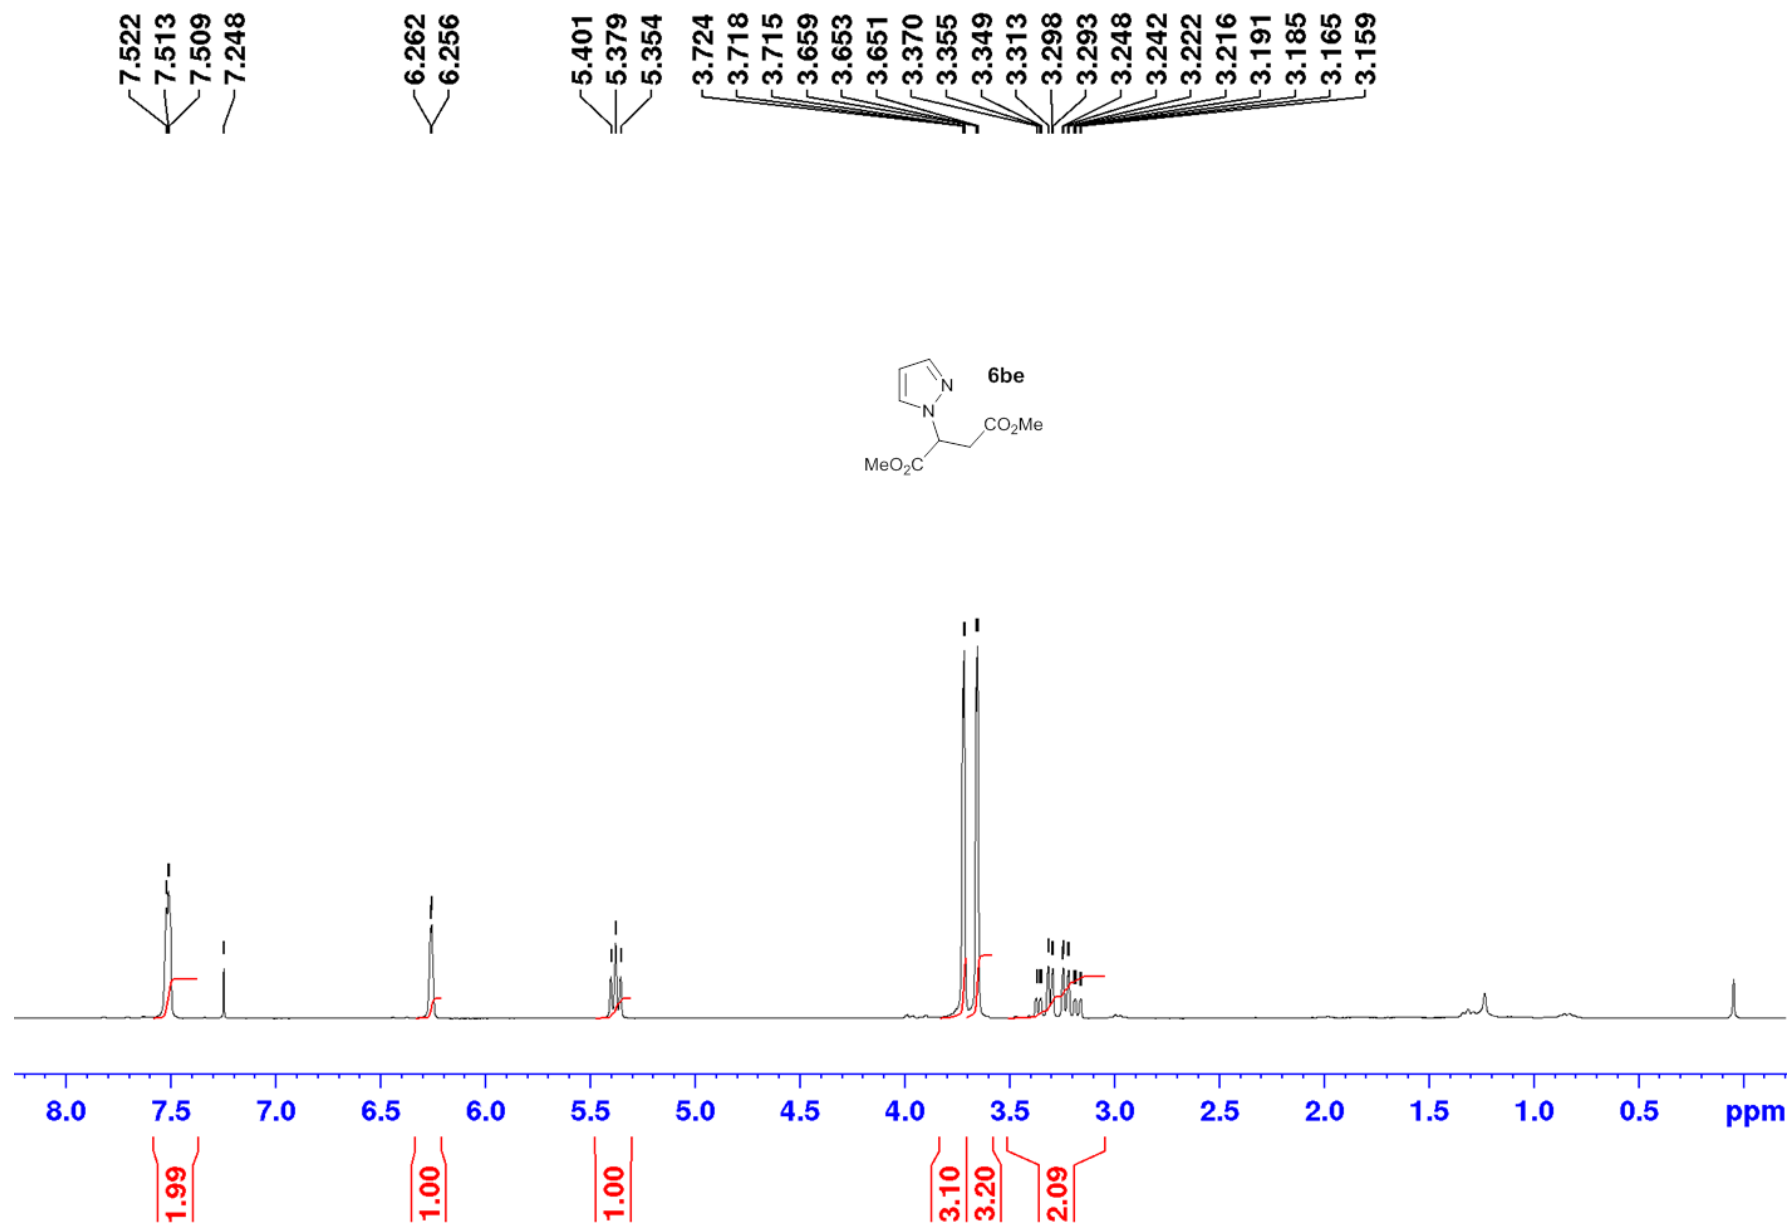



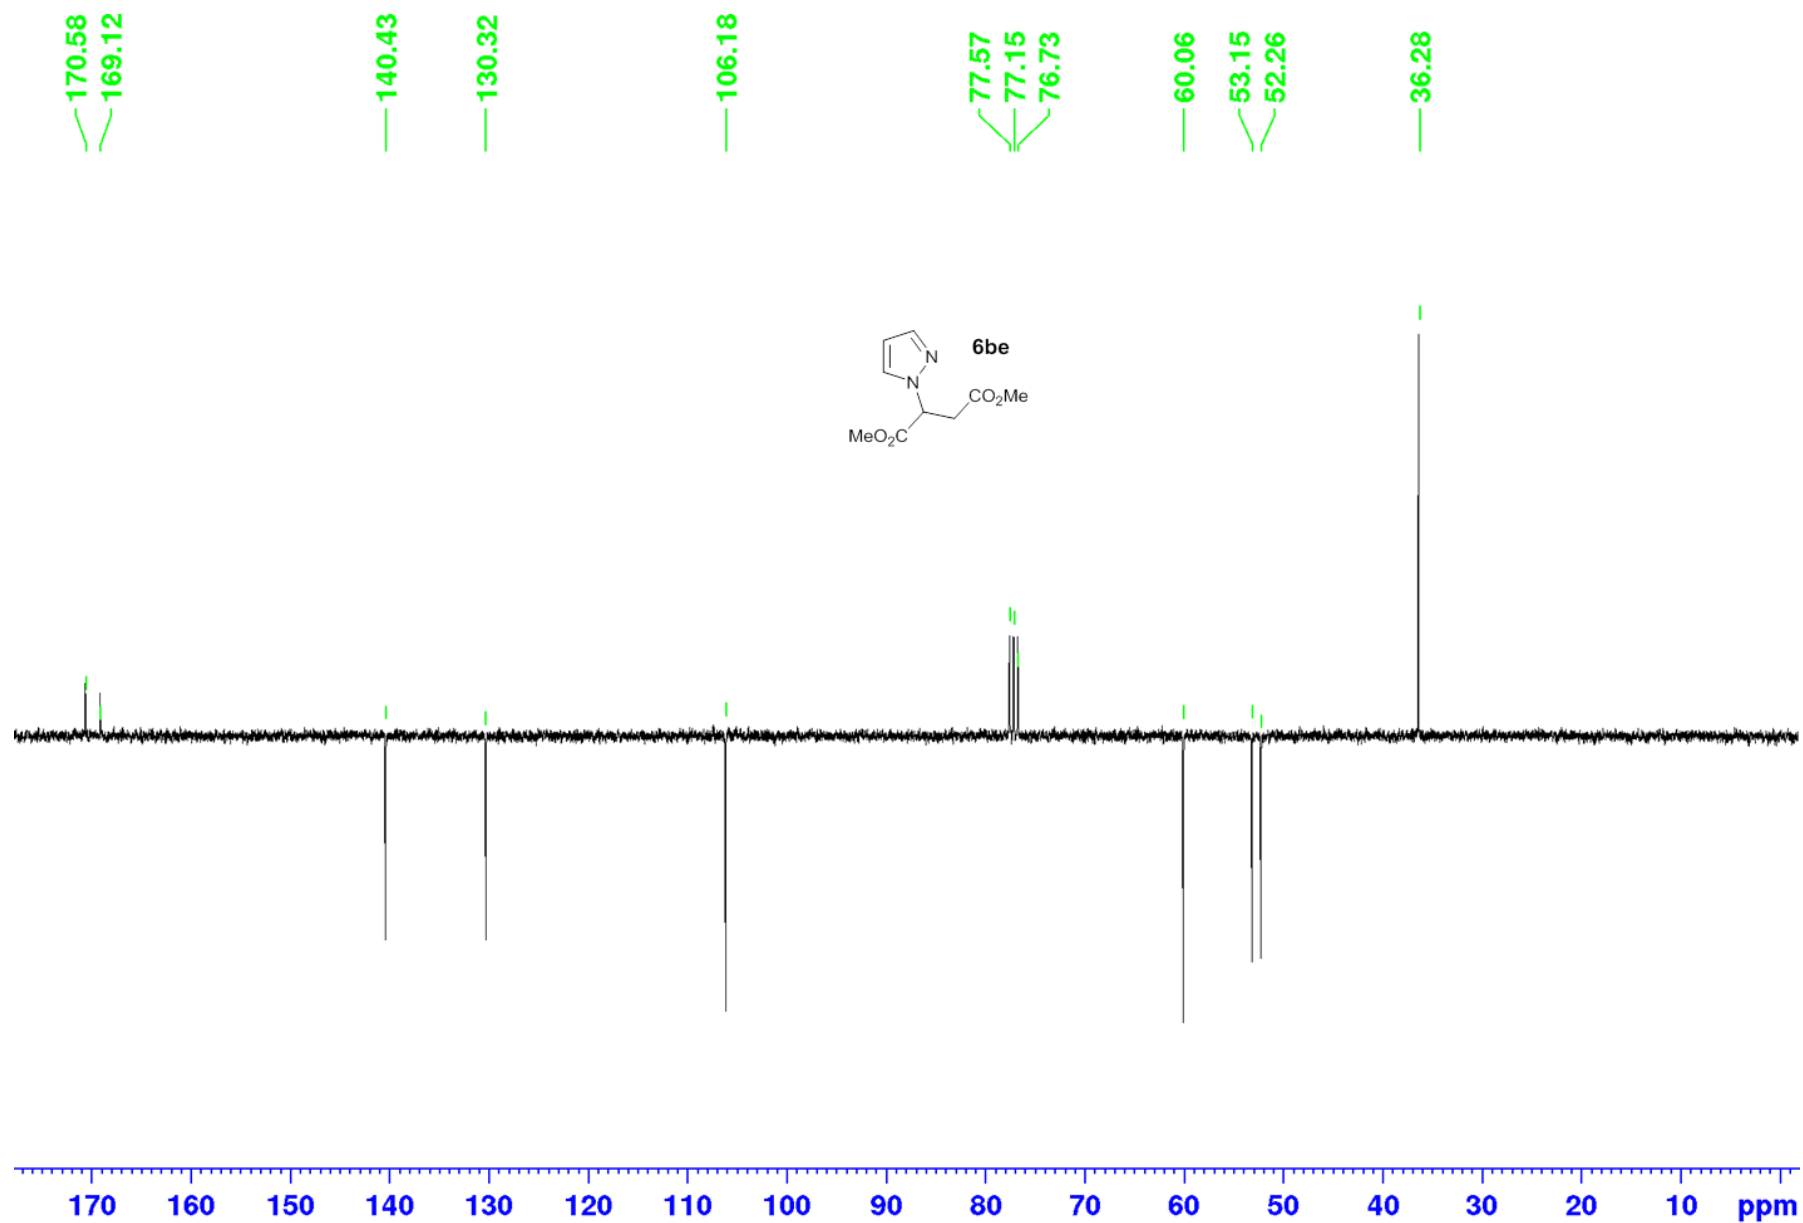

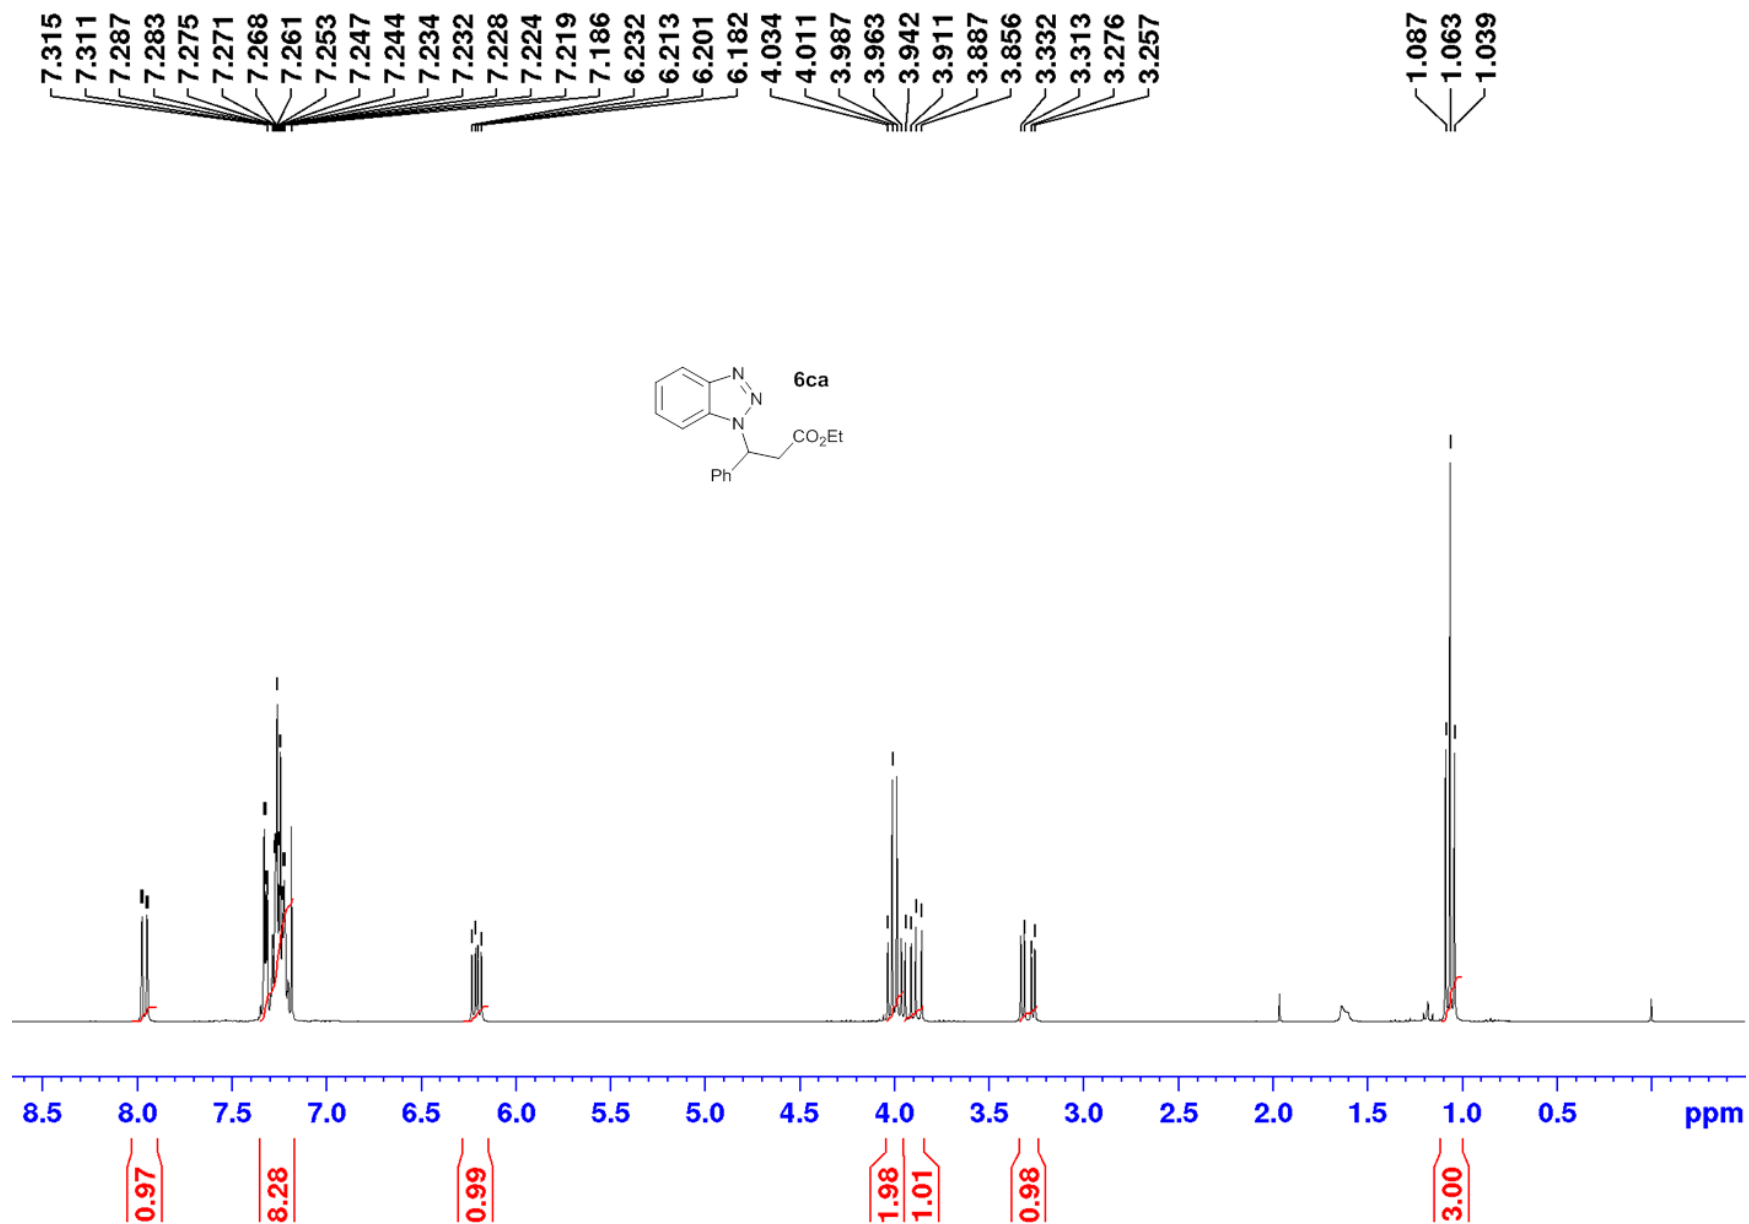

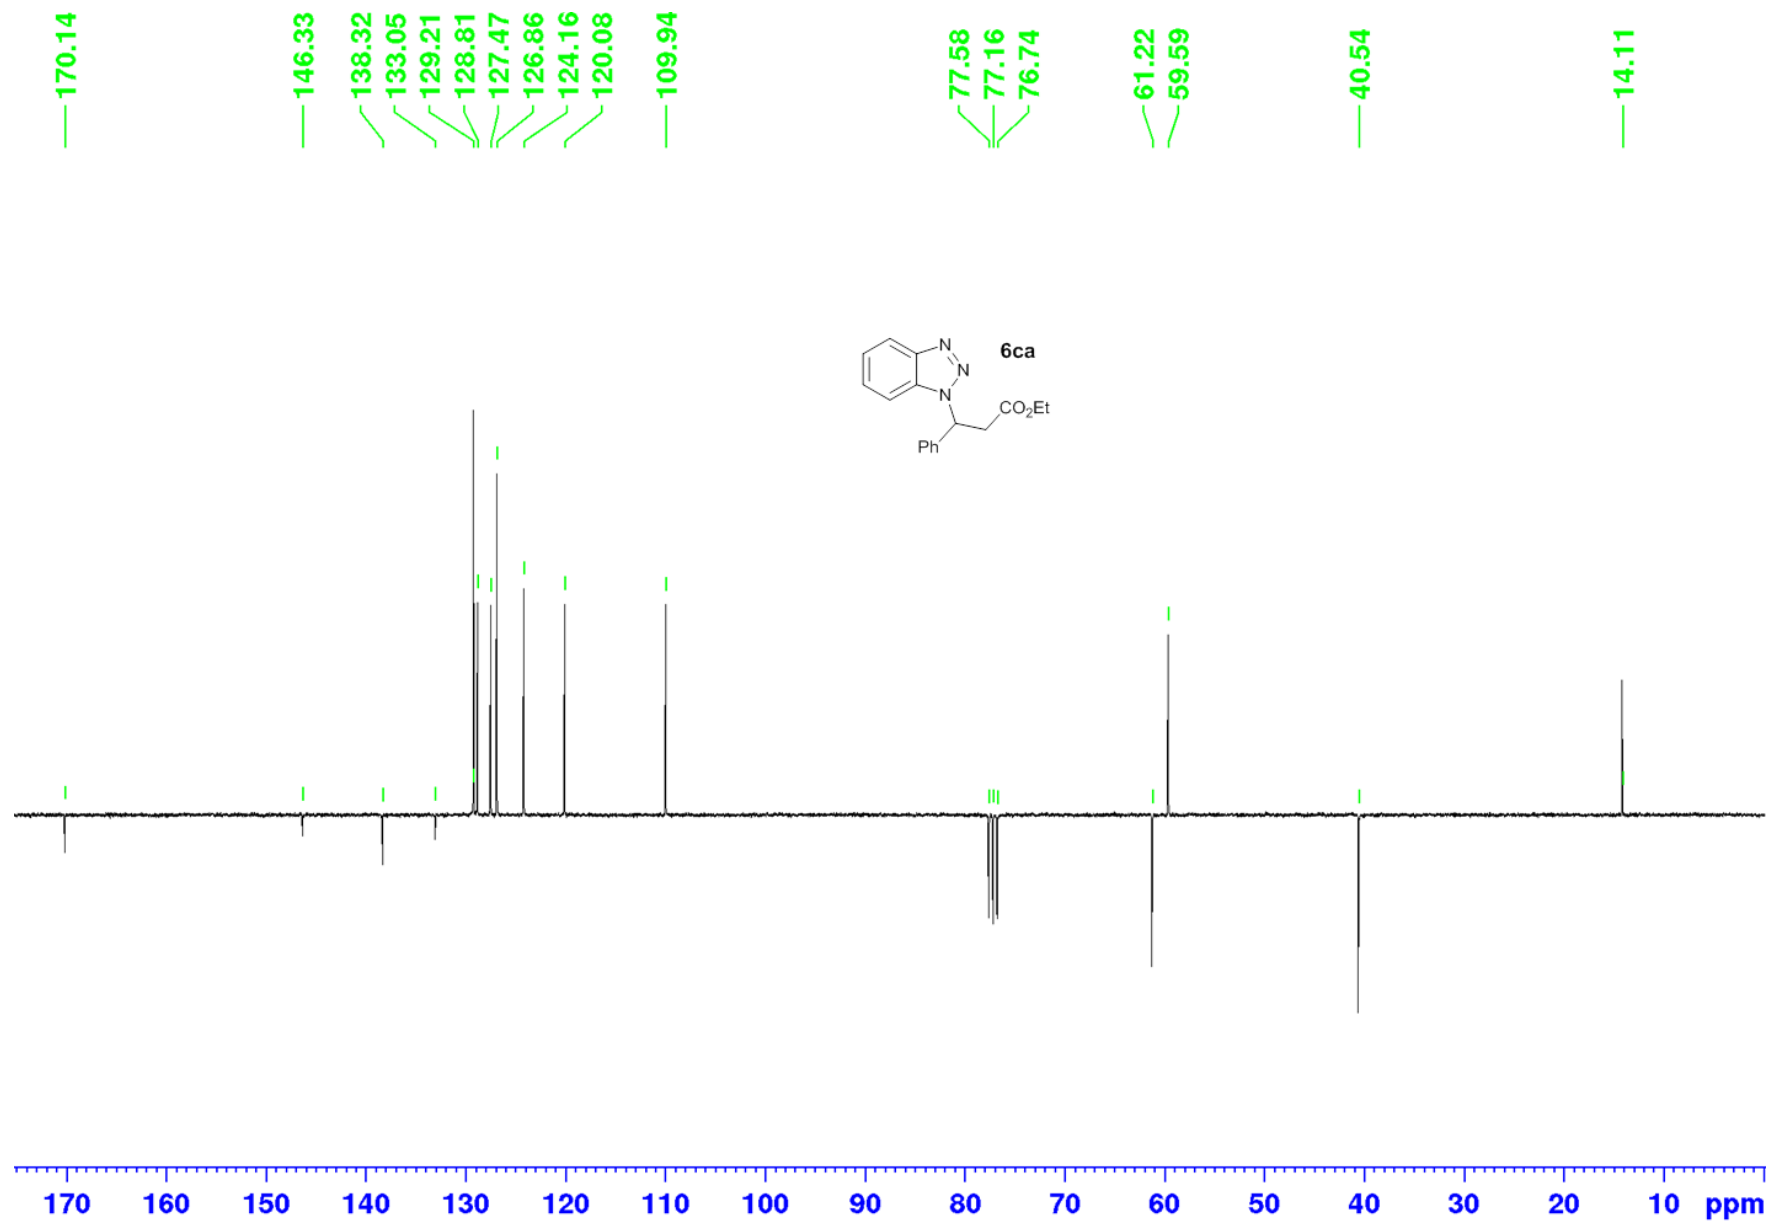

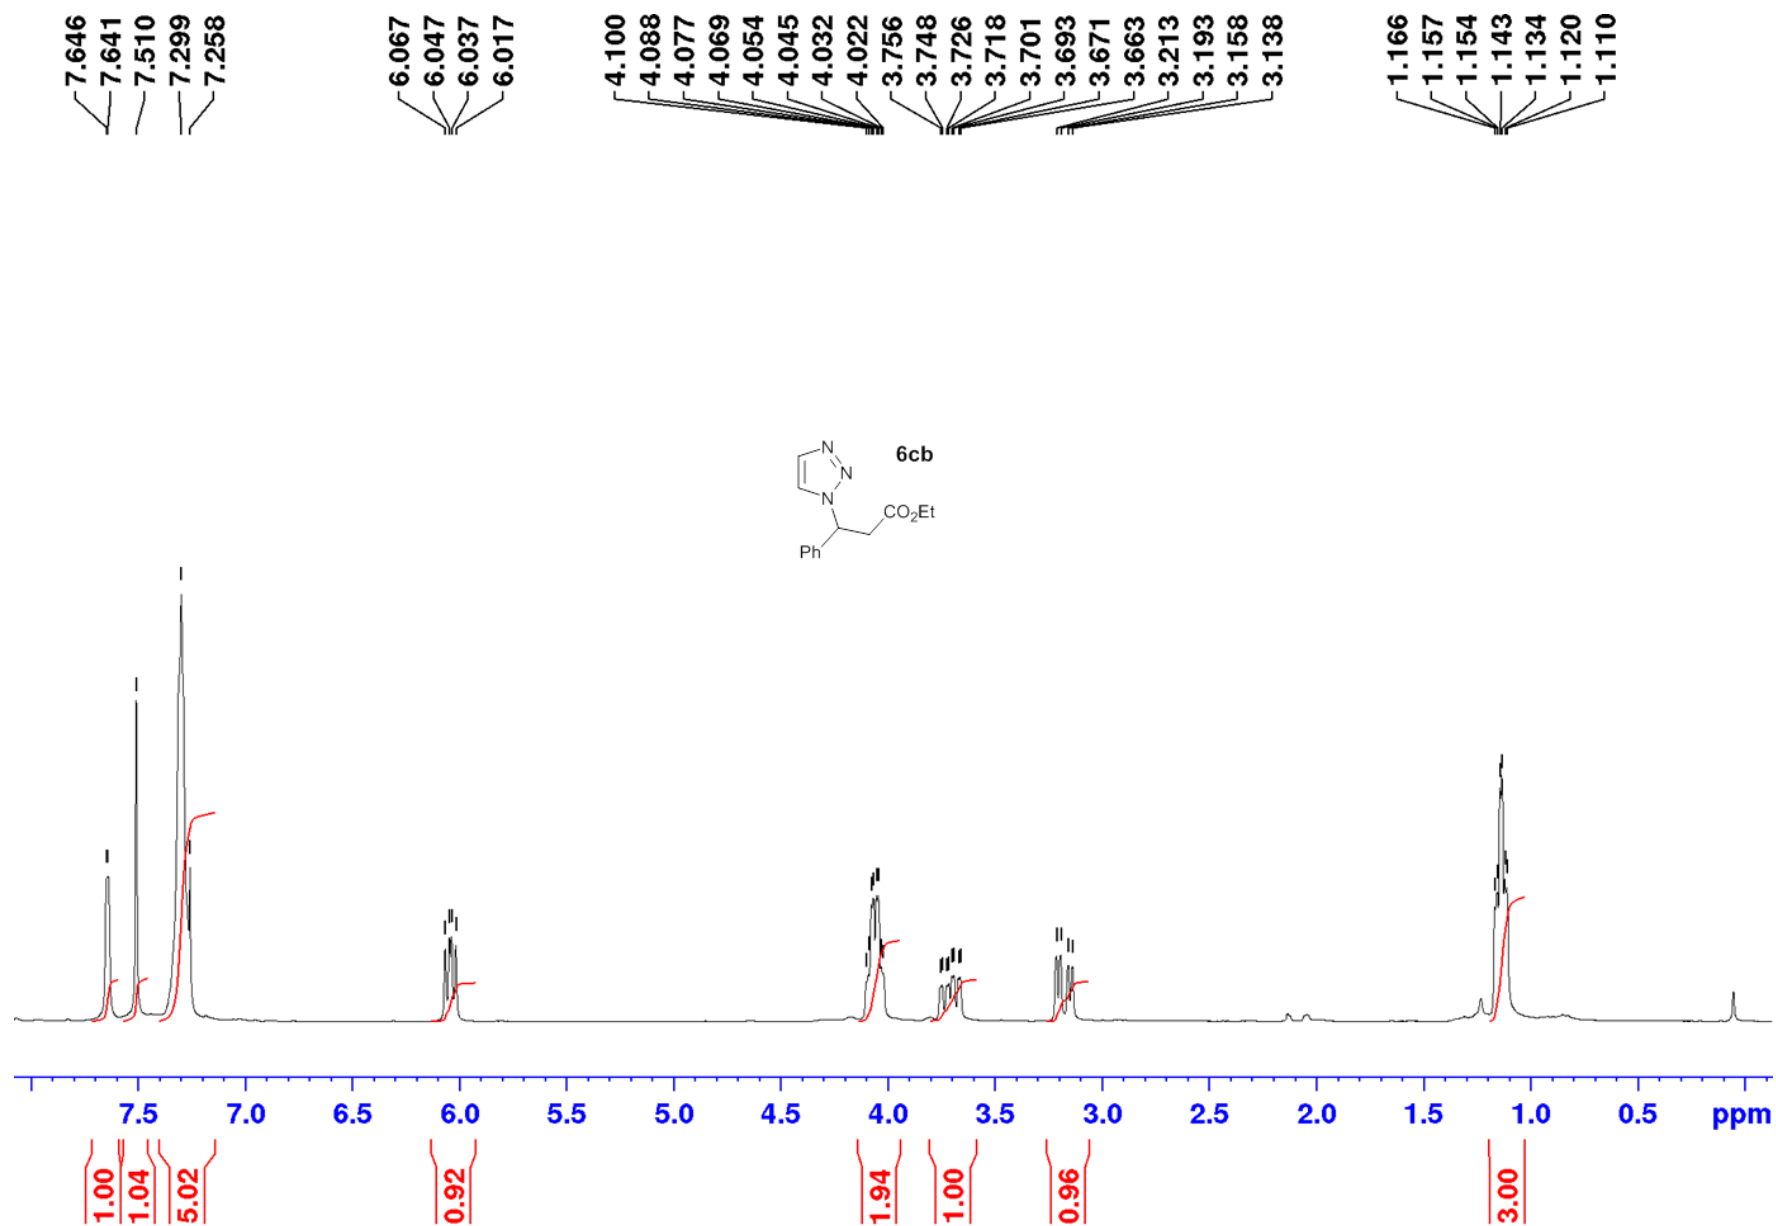

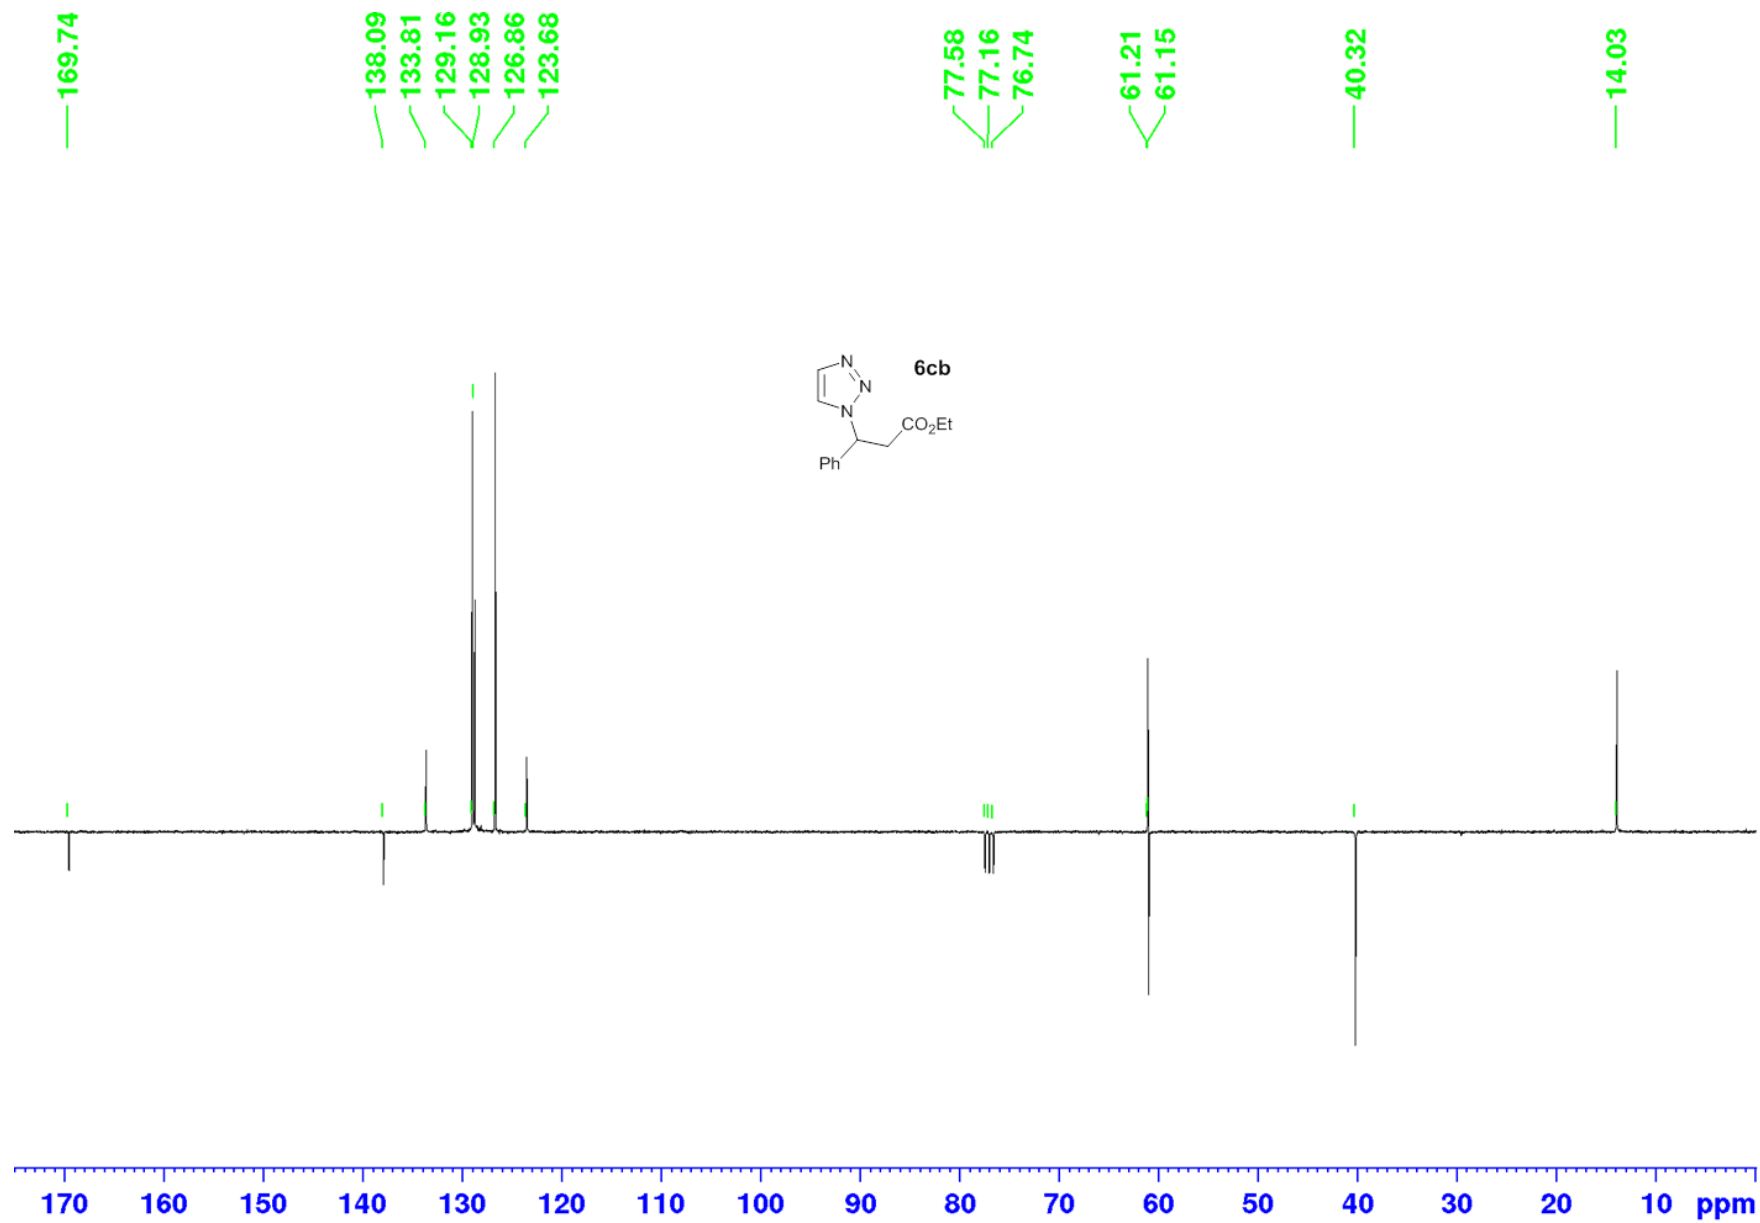

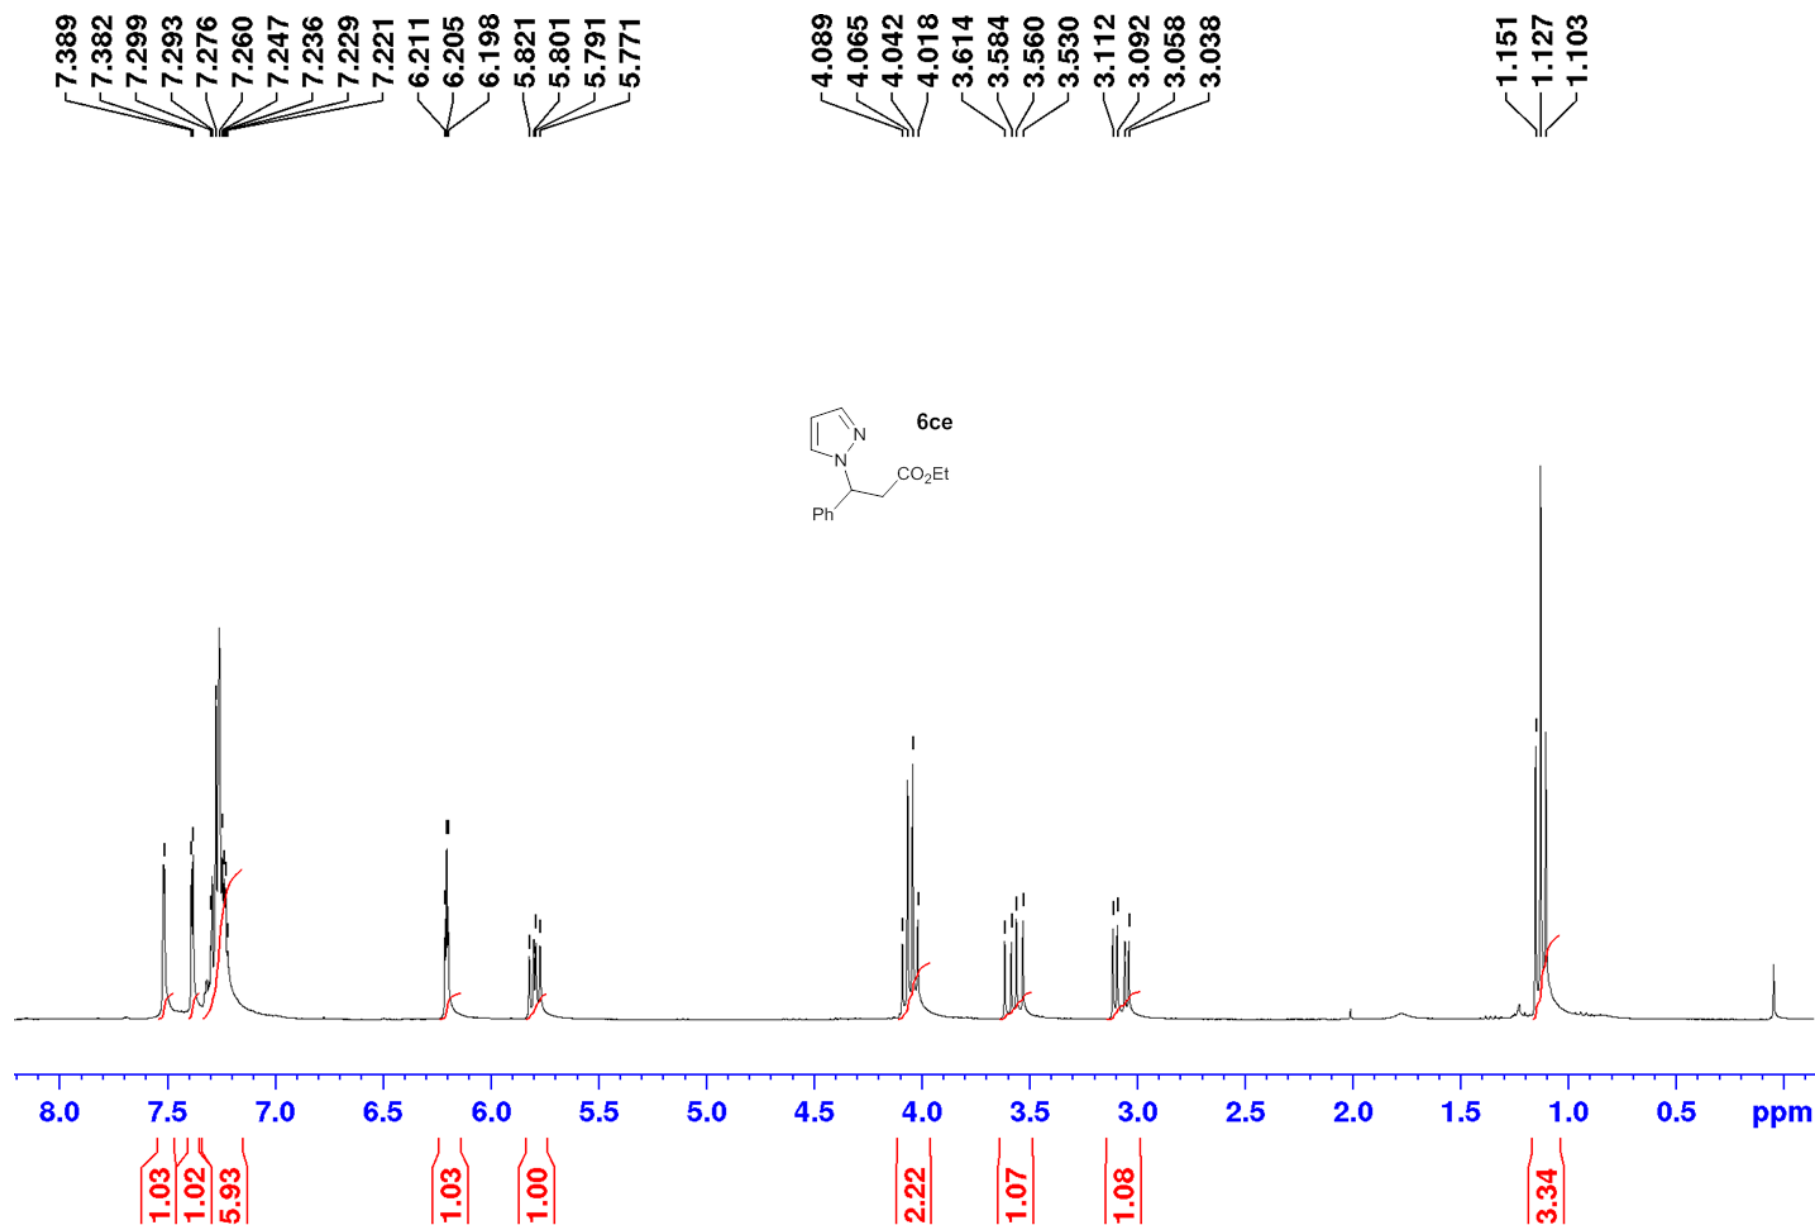

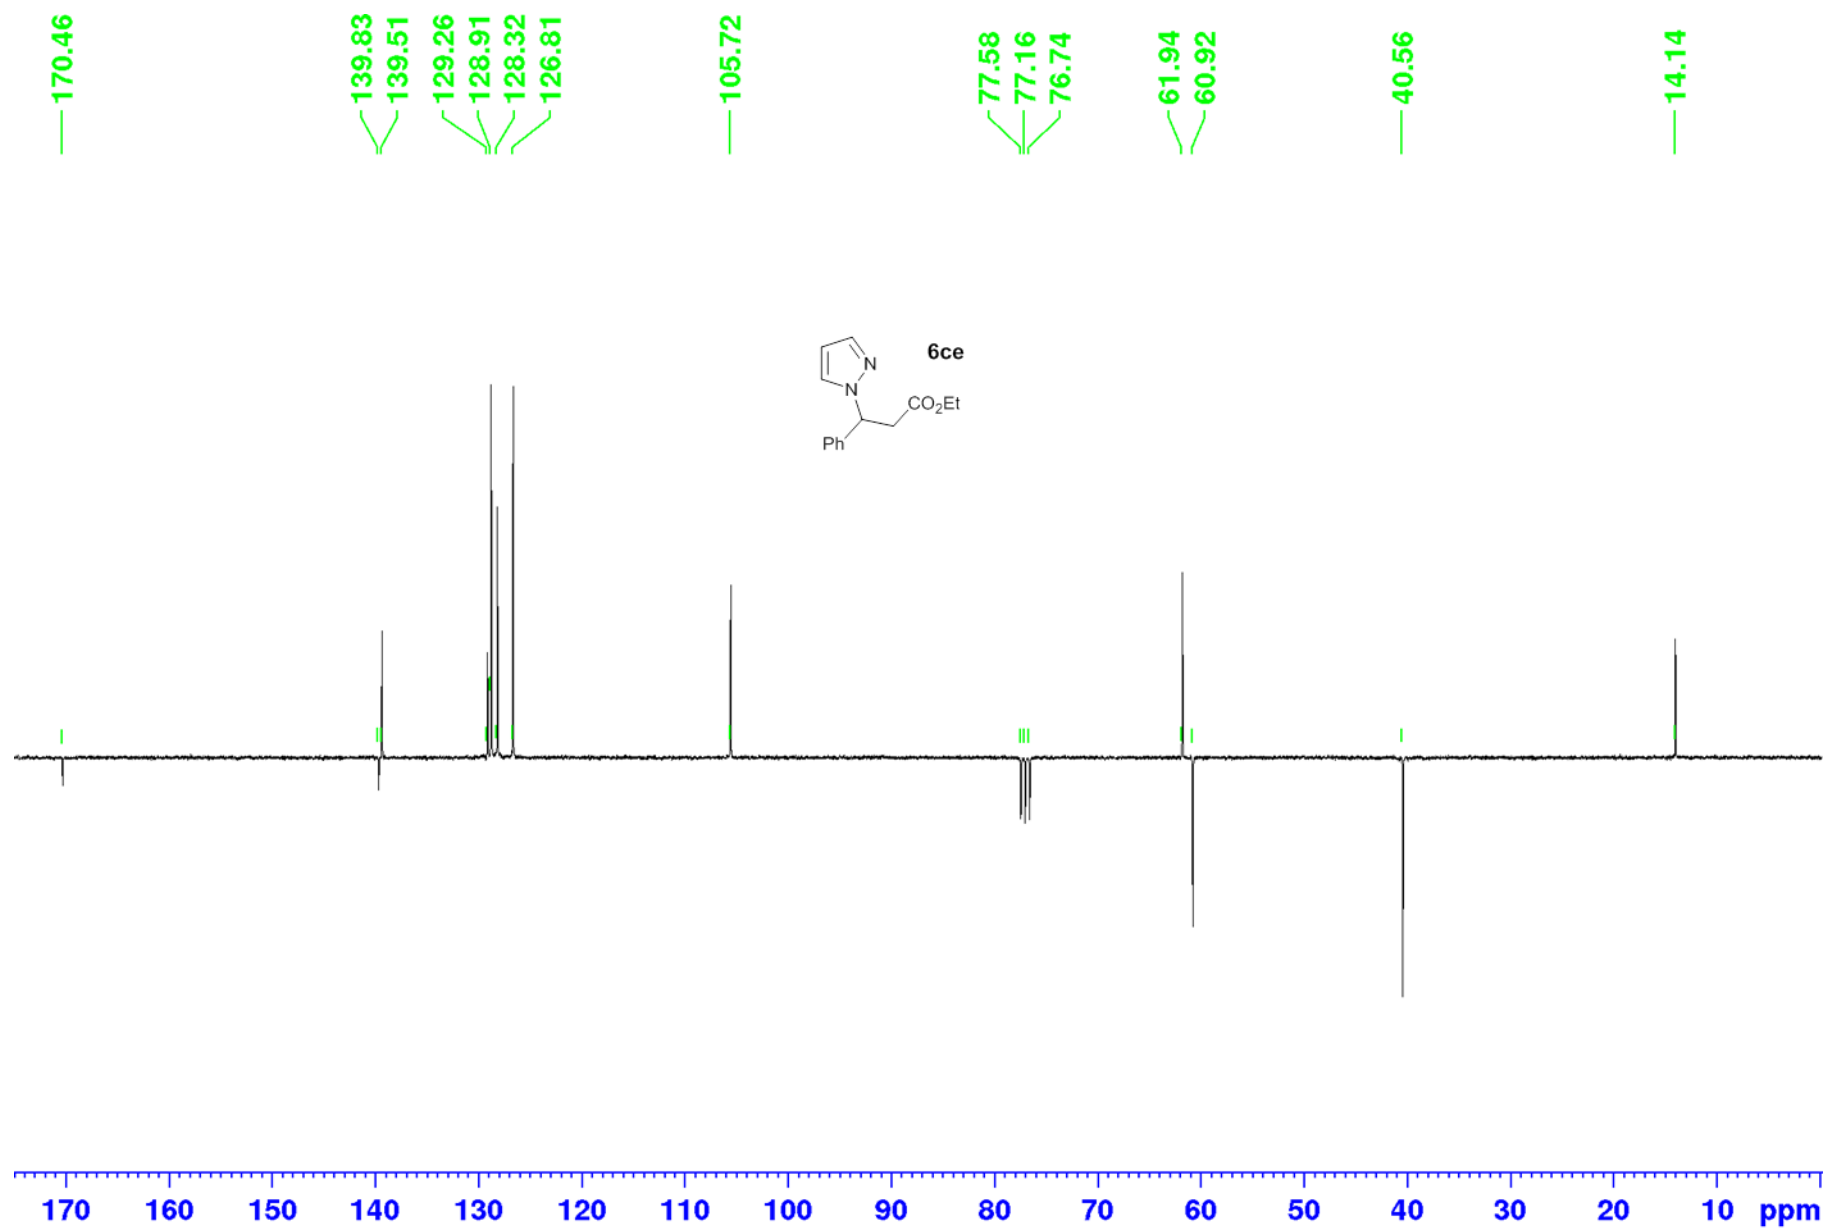

7.399  
7.392  
7.374  
7.369  
7.359  
7.316  
7.307  
7.301  
7.290  
7.284  
7.260  
6.309  
6.302  
6.295  
5.626  
5.602  
5.578

3.618  
3.592  
3.562  
3.536  
3.296  
3.274  
3.241  
3.218

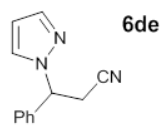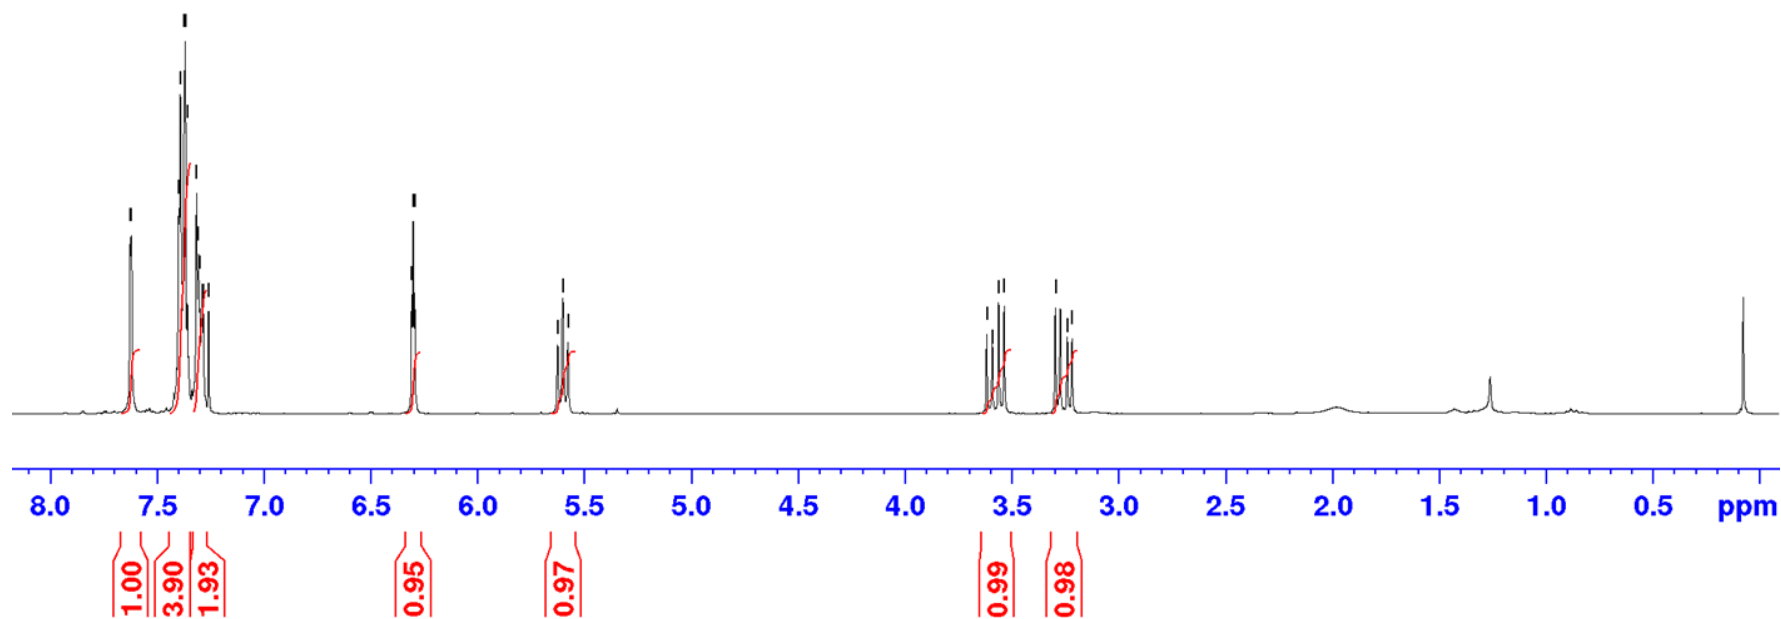



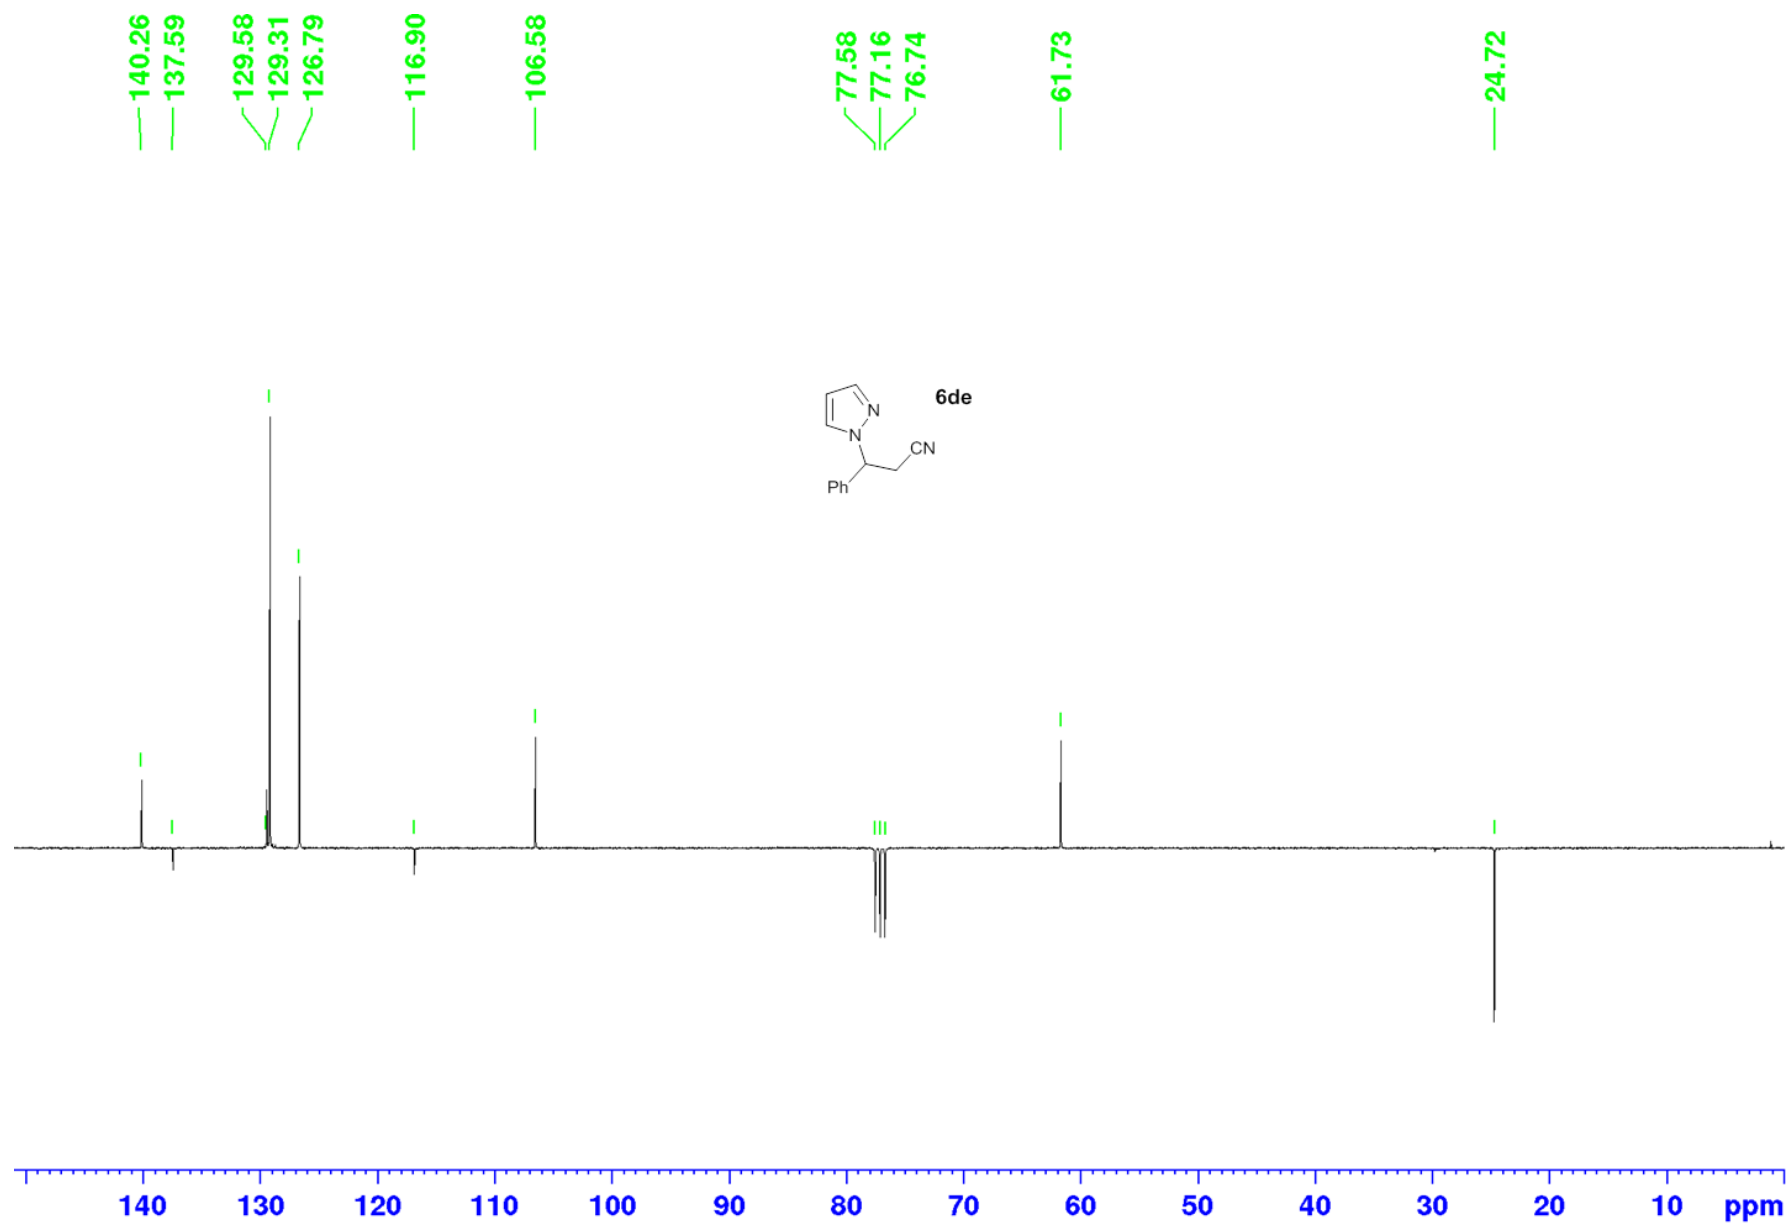

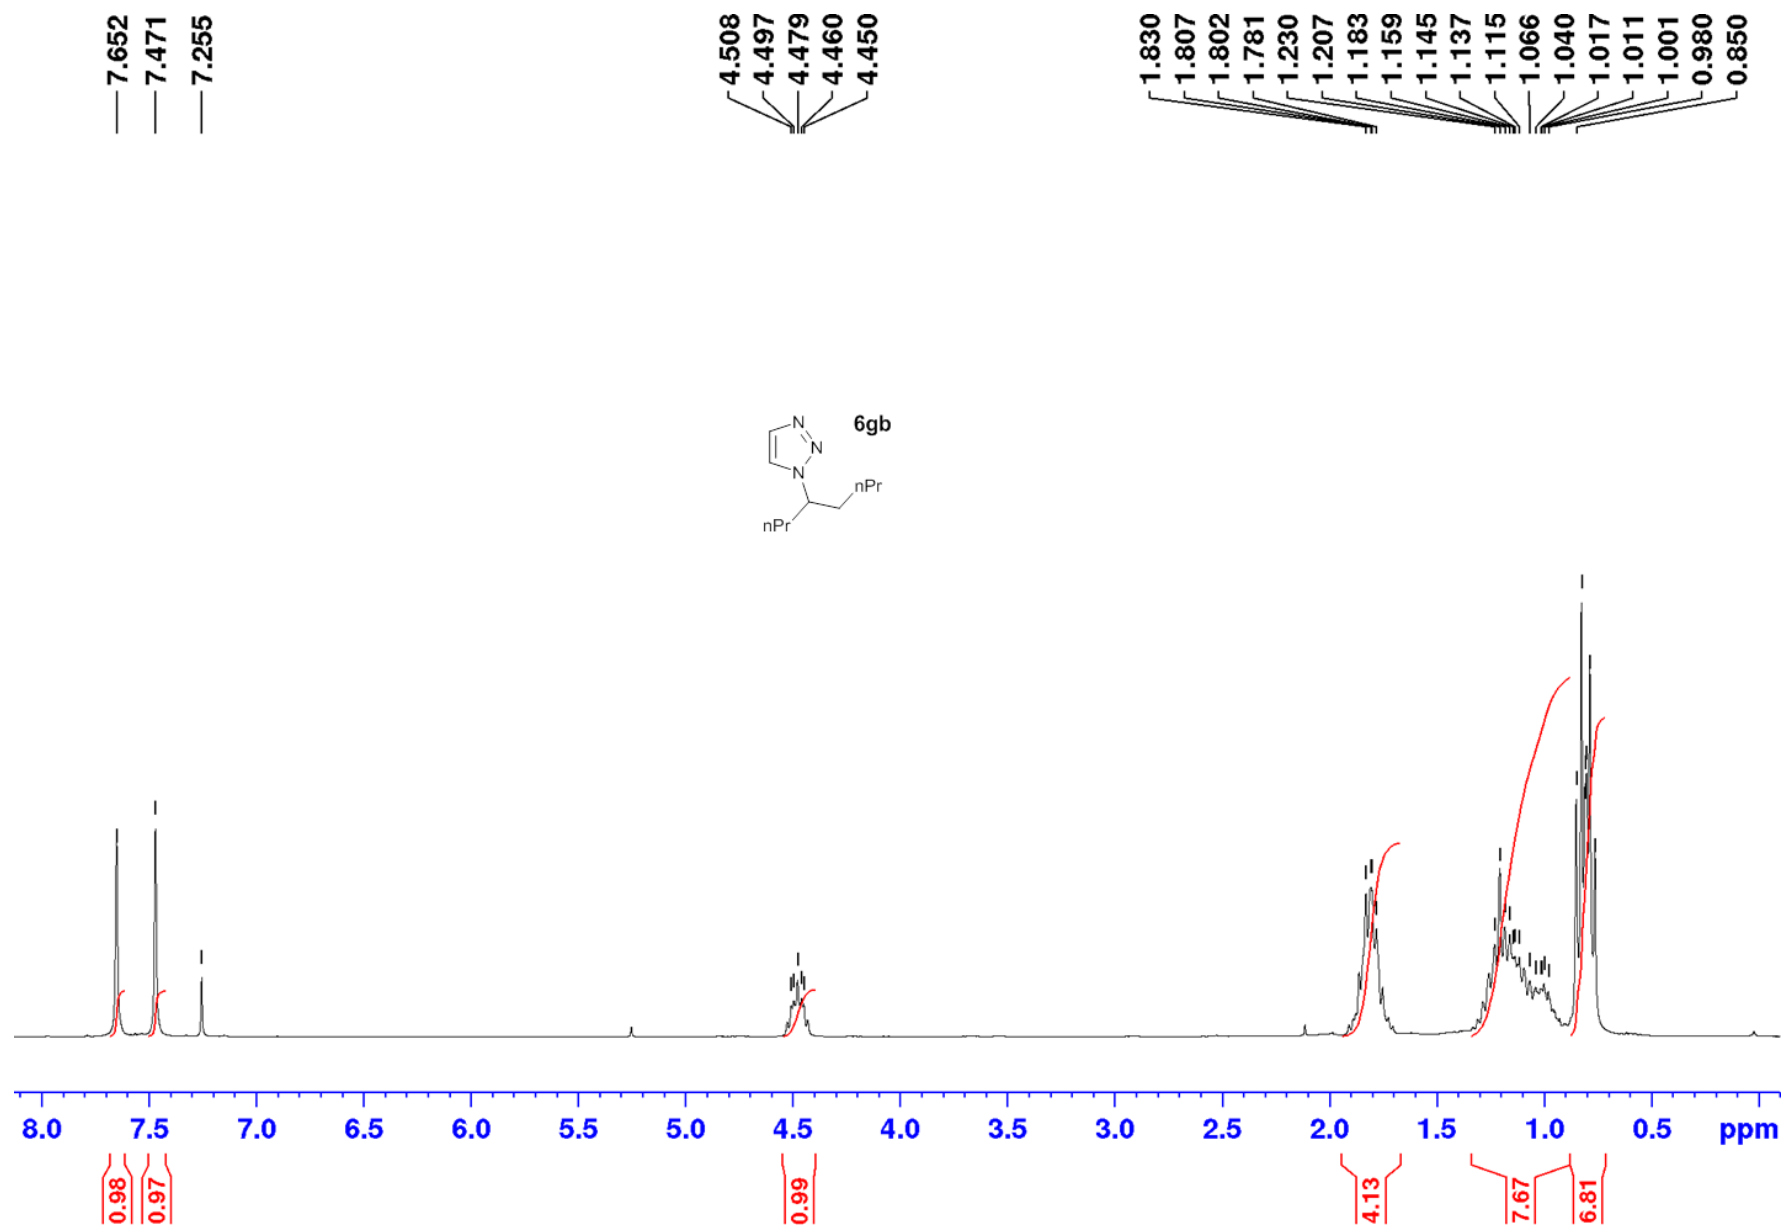

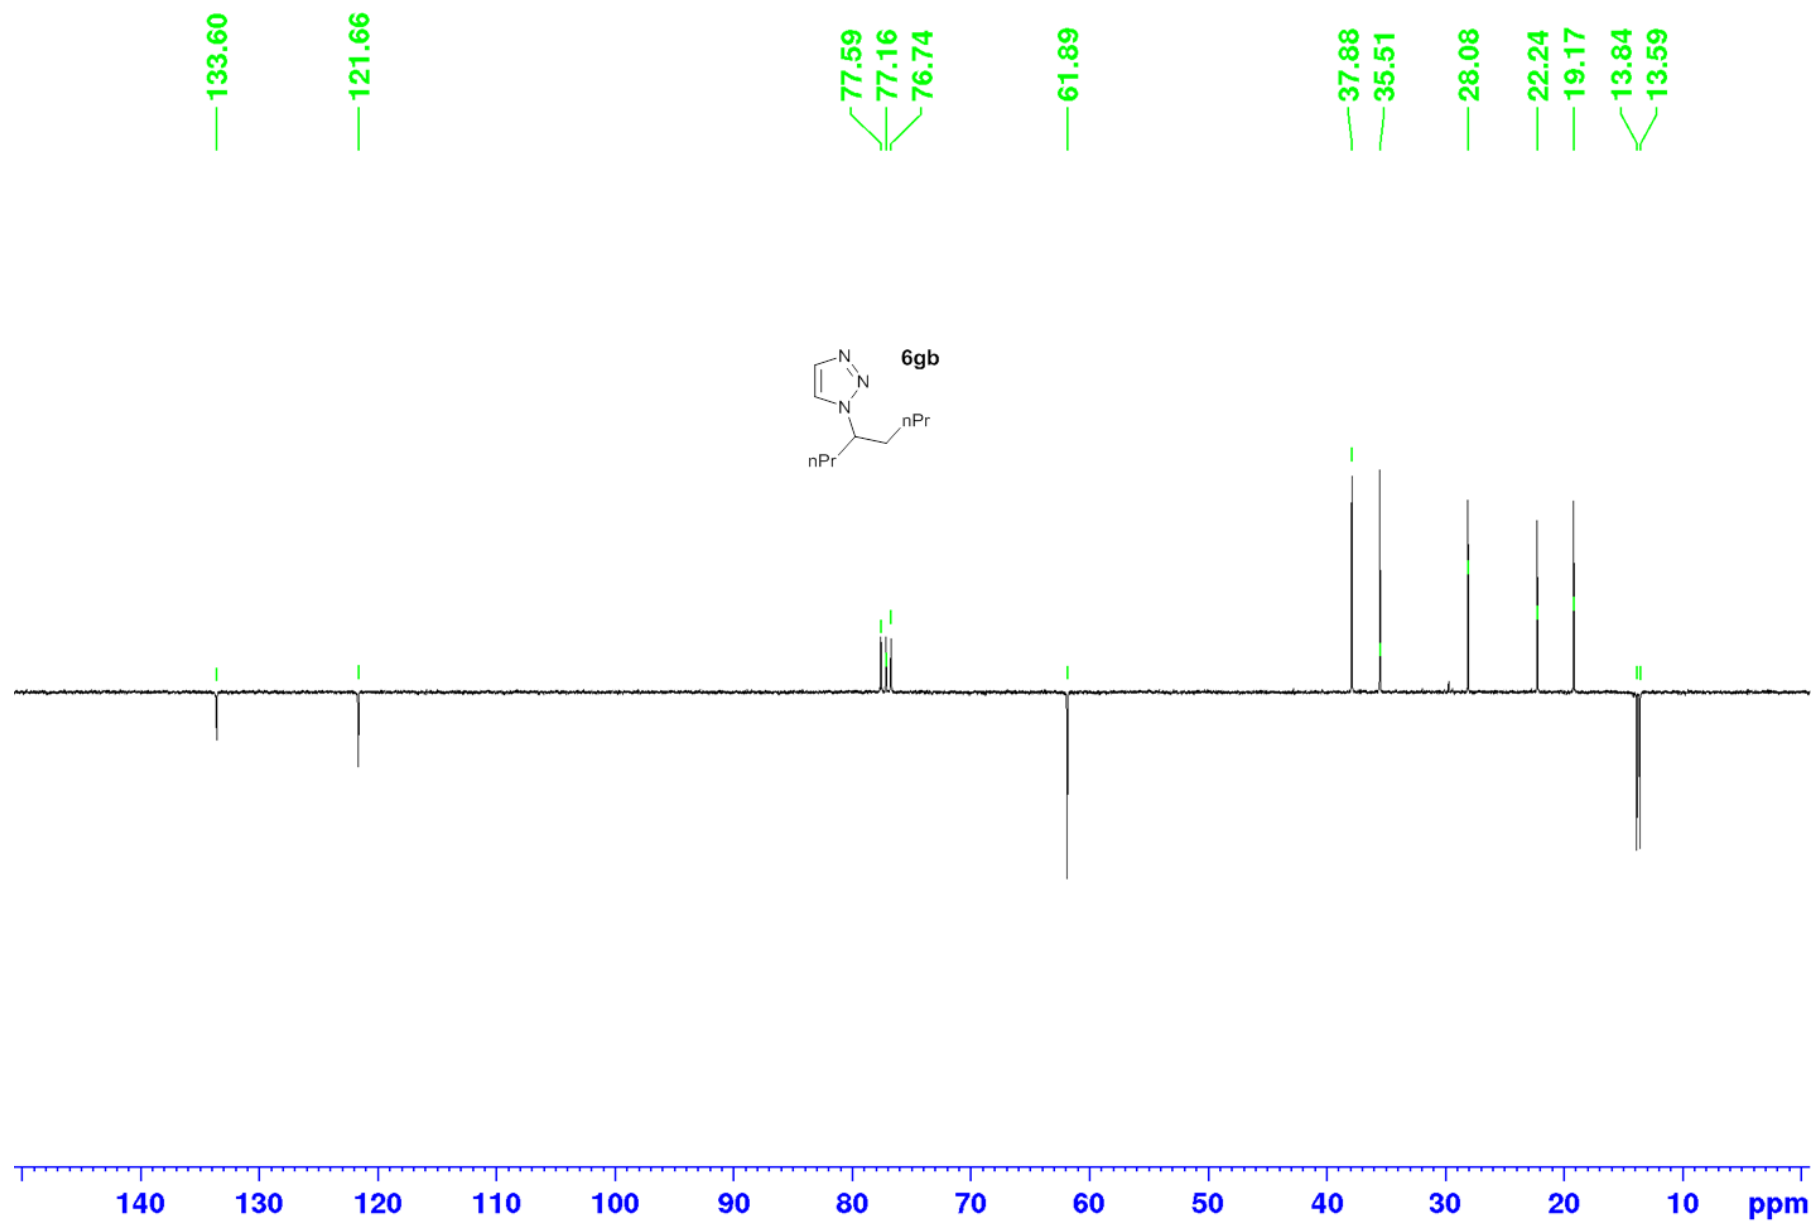

Supplement: c9ob00587k1.pdf [file c9ob00587k1.pdf]
